# Supplementary material for: Genetic Diversity and Characteristics of blaNDM-Positive Plasmids in Escherichia coli
Source: Front Microbiol. 2021 Nov 16;12:729952. doi: 10.3389/fmicb.2021.729952 (PMC8636099; doi:10.3389/fmicb.2021.729952)
Supplement: Supplementary file 3 [file Table_1.XLSX]

## Sheet: Length_GC_summary_3786
Plasmid_name	Length (bp)	GC (%)	Description
NC_002128	92721	47.6	Escherichia coli O157:H7 str. Sakai plasmid pO157, complete sequence.
NC_002127	3306	43.41	Escherichia coli O157:H7 str. Sakai plasmid pOSAK1, complete sequence.
NZ_CP033091	131333	49.33	Escherichia coli DSM 30083 = JCM 1649 = ATCC 11775 plasmid unnamed, complete sequence.
NZ_CP027600	120604	53.21	Escherichia coli strain 97-3250 plasmid unnamed1, complete sequence.
NZ_CP027601	92590	47.72	Escherichia coli strain 97-3250 plasmid unnamed2.
NZ_CP027391	98724	47.92	Escherichia coli strain 2015C-4944 plasmid unnamed, complete sequence.
NZ_CP028125	98899	47.85	Escherichia coli O26 str. RM10386 plasmid pRM10386-1, complete sequence.
NZ_CP028124	83012	48.72	Escherichia coli O26 str. RM10386 plasmid pRM10386-2, complete sequence.
NZ_CP016626	95598	48.04	Escherichia coli O157:H7 strain FRIK944 plasmid p0157, complete sequence.
NZ_CP062740	95229	48.05	Escherichia coli O157:H7 strain Z1723 plasmid pZ1723-1, complete sequence.
NZ_CP062741	3306	43.41	Escherichia coli O157:H7 strain Z1723 plasmid pZ1723-2, complete sequence.
NZ_CP058683	92578	47.77	Escherichia coli strain MBT-5 plasmid unnamed1, complete sequence.
NZ_CP058684	89589	47.55	Escherichia coli strain MBT-5 plasmid unnamed2, complete sequence.
NZ_CP058685	34196	39.69	Escherichia coli strain MBT-5 plasmid unnamed3, complete sequence.
NZ_CP058686	6715	45.58	Escherichia coli strain MBT-5 plasmid unnamed4, complete sequence.
NZ_CP058687	4742	41.16	Escherichia coli strain MBT-5 plasmid unnamed5, complete sequence.
NZ_CP058688	2784	42.17	Escherichia coli strain MBT-5 plasmid unnamed6, complete sequence.
NC_013369	85167	47.48	Escherichia coli O26:H11 str. 11368 plasmid pO26_1, complete sequence.
NC_013362	63365	52.5	Escherichia coli O26:H11 str. 11368 plasmid pO26_2, complete sequence.
NC_013363	5686	46.22	Escherichia coli O26:H11 str. 11368 plasmid pO26_3, complete sequence.
NC_014543	4073	44.12	Escherichia coli O26:H11 str. 11368 plasmid pO26_4, complete sequence.
NZ_CP031923	95298	47.98	Escherichia coli O26:H11 strain FWSEC0001 plasmid unnamed6, complete sequence.
NZ_CP031924	6715	45.58	Escherichia coli O26:H11 strain FWSEC0001 plasmid unnamed7, complete sequence.
NZ_CP031925	4148	42.55	Escherichia coli O26:H11 strain FWSEC0001 plasmid unnamed8, complete sequence.
NZ_CP031921	2031	55.59	Escherichia coli O145:NM strain FWSEC0002 plasmid unnamed10, complete sequence.
NZ_CP031920	92498	47.7	Escherichia coli O145:NM strain FWSEC0002 plasmid unnamed9, complete sequence.
NZ_CP037944	88848	47.49	Escherichia coli strain CFSAN027343 plasmid pCFSAN027343, complete sequence.
NZ_CP027583	88339	47.5	Escherichia coli strain 2013C-4538 plasmid unnamed.
NZ_AP018809	99498	46.92	Escherichia coli strain E2865 plasmid pE2865-1, complete sequence.
NZ_AP018810	92186	47.74	Escherichia coli strain E2865 plasmid pE2865-2, complete sequence.
NZ_AP018811	75799	53.07	Escherichia coli strain E2865 plasmid pE2865-3, complete sequence.
NZ_AP018812	62235	42.79	Escherichia coli strain E2865 plasmid pE2865-4, complete sequence.
NZ_CP062783	92745	47.83	Escherichia coli O157:H7 strain Z869 plasmid pZ869-1, complete sequence.
NZ_CP062784	39226	39.93	Escherichia coli O157:H7 strain Z869 plasmid pZ869-2, complete sequence.
NZ_CP062785	5091	46.47	Escherichia coli O157:H7 strain Z869 plasmid pZ869-3, complete sequence.
NZ_CP062786	3306	43.41	Escherichia coli O157:H7 strain Z869 plasmid pZ869-4, complete sequence.
NZ_CP027473	81624	47.02	Escherichia coli strain 2014C-3050 plasmid unnamed.
NZ_CP028115	90123	47.51	Escherichia coli O26 str. RM8426 plasmid pRM8426, complete sequence.
NZ_CP027353	20881	50.38	Escherichia coli strain 2012C-4606 plasmid unnamed1.
NZ_CP027354	57720	46.44	Escherichia coli strain 2012C-4606 plasmid unnamed2.
NZ_CP027578	87714	47.5	Escherichia coli strain 2013C-4225 plasmid unnamed.
NZ_CP027386	54452	45.2	Escherichia coli strain 2014C-3057 plasmid unnamed.
NZ_CP015845	34689	40.03	Escherichia coli O157:H7 strain FRIK2455 plasmid p35K, complete sequence.
NZ_CP015844	95598	48.04	Escherichia coli O157:H7 strain FRIK2455 plasmid pO157, complete sequence.
NZ_CP015847	95599	48.04	Escherichia coli O157:H7 strain FRIK2069 plasmid p0157, complete sequence.
NZ_CP022729	34689	40.03	Escherichia coli O157:H7 strain FRIK2533 plasmid p35K, complete sequence.
NZ_CP038304	96937	48.12	Escherichia coli O157:H7 strain SS TX 313-1 plasmid pTX313-1, complete sequence.
NZ_CP038303	37590	39.78	Escherichia coli O157:H7 strain SS TX 313-1 plasmid pTX313-2, complete sequence.
NZ_CP027443	95157	46.96	Escherichia coli strain 2013C-3252 plasmid unnamed1, complete sequence.
NZ_CP027444	91399	47.53	Escherichia coli strain 2013C-3252 plasmid unnamed2, complete sequence.
NZ_CP028113	94220	47.89	Escherichia coli O103 str. RM8385 plasmid pRM8385-1, complete sequence.
NZ_CP028114	6673	50.19	Escherichia coli O103 str. RM8385 plasmid pRM8385-2, complete sequence.
NZ_CP050499	76269	45.93	Escherichia coli strain RM13322 plasmid pRM13322, complete sequence.
NZ_CP047379	190219	47.1	Escherichia coli strain CAU16175 plasmid pCAU16175_1, complete sequence.
NZ_CP047380	161176	47.91	Escherichia coli strain CAU16175 plasmid pCAU16175_2, complete sequence.
NZ_CP047381	76633	51.35	Escherichia coli strain CAU16175 plasmid pCAU16175_3, complete sequence.
NZ_CP047382	10675	49.23	Escherichia coli strain CAU16175 plasmid pCAU16175_4, complete sequence.
NZ_CP047383	7098	50.52	Escherichia coli strain CAU16175 plasmid pCAU16175_5, complete sequence.
NZ_CP047384	6988	47.58	Escherichia coli strain CAU16175 plasmid pCAU16175_6, complete sequence.
NZ_CP038404	95604	48.04	Escherichia coli O157:H7 strain BB24-1 plasmid pBB24-1, complete sequence.
NZ_CP038403	6675	50.35	Escherichia coli O157:H7 strain BB24-1 plasmid pBB24-2, complete sequence.
NZ_CP038332	92495	47.82	Escherichia coli O157:H7 strain NE 1092-2 plasmid pNE1092-1, complete sequence.
NZ_CP038329	1538	51.89	Escherichia coli O157:H7 strain NE 1092-2 plasmid pNE1092-2, complete sequence.
NZ_CP038330	93970	52.84	Escherichia coli O157:H7 strain NE 1092-2 plasmid pNE1092-3, complete sequence.
NZ_CP038331	6675	50.23	Escherichia coli O157:H7 strain NE 1092-2 plasmid pNE1092-4, complete sequence.
NZ_CP028608	92745	47.6	Escherichia coli strain 143 plasmid pTA143, complete sequence.
NZ_AP018489	94391	48.08	Escherichia coli O157:H7 strain PV15-279 plasmid pO157pv15279, complete sequence.
NZ_CP027339	92644	47.54	Escherichia coli strain 2014C-3051 plasmid unnamed, complete sequence.
NZ_CP038312	93182	47.8	Escherichia coli O157:H7 strain Show KS 470-1 plasmid pKS470-1, complete sequence.
NZ_CP038310	6042	46.41	Escherichia coli O157:H7 strain Show KS 470-1 plasmid pKS470-2, complete sequence.
NZ_CP038311	43127	41.86	Escherichia coli O157:H7 strain Show KS 470-1 plasmid pKS470-3, complete sequence.
NZ_CP038373	92725	47.6	Escherichia coli O157:H7 strain F6294 plasmid pF6294-1, complete sequence.
NZ_CP037946	96016	47.71	Escherichia coli strain CFSAN027346 plasmid pCFSAN027346-1, complete sequence.
NZ_CP037947	73152	51.29	Escherichia coli strain CFSAN027346 plasmid pCFSAN027346-2, complete sequence.
NZ_CP062726	92762	47.83	Escherichia coli O157:H7 strain Z1813 plasmid pZ1813-1, complete sequence.
NZ_CP038291	98061	48.26	Escherichia coli O157:H7 strain TX 265-1 plasmid pTX265-1, complete sequence.
NZ_CP006028	87120	47.61	Escherichia coli O145:H28 str. RM13514 plasmid pO145-13514, complete sequence.
NZ_CP006029	64561	52.62	Escherichia coli O145:H28 str. RM13514 plasmid pRM13514, complete sequence.
NZ_CP007138	87120	47.61	Escherichia coli O145:H28 str. RM12581 plasmid pO145-12581, complete sequence.
NZ_CP007137	64562	52.62	Escherichia coli O145:H28 str. RM12581 plasmid pRM12581, complete sequence.
NZ_CP027554	70129	51.13	Escherichia coli strain 2013C-3513 plasmid unnamed1.
NZ_CP027556	91046	47.52	Escherichia coli strain 2013C-3513 plasmid unnamed2.
NZ_CP032809	92771	47.87	Escherichia coli strain ERL04-3476 plasmid pERL04-3476-1, complete sequence.
NZ_CP032810	61441	51.49	Escherichia coli strain ERL04-3476 plasmid pERL04-3476-2, complete sequence.
NZ_CP038426	92986	47.77	Escherichia coli O157:H7 strain 2571 plasmid p2571-1, complete sequence.
NZ_CP038427	2728	47.14	Escherichia coli O157:H7 strain 2571 plasmid p2571-2, complete sequence.
NC_011351	37452	39.71	Escherichia coli O157:H7 str. EC4115 plasmid pEC4115, complete sequence.
NC_011350	94644	47.89	Escherichia coli O157:H7 str. EC4115 plasmid pO157, complete sequence.
NZ_CP038385	80565	53.56	Escherichia coli O157:H7 strain DEC5E plasmid pDEC5E-2, complete sequence.
NZ_CP038384	69832	52.2	Escherichia coli O157:H7 strain DEC5E plasmid pDEC5E-3, complete sequence.
NZ_CP045828	100778	48.23	Escherichia coli strain AUSMDU00014361 plasmid pAUSMDU00014361_01, complete sequence.
NZ_CP045829	100217	46.97	Escherichia coli strain AUSMDU00014361 plasmid pAUSMDU00014361_02, complete sequence.
NZ_CP045830	2974	45.56	Escherichia coli strain AUSMDU00014361 plasmid pAUSMDU00014361_03, complete sequence.
NZ_CP038352	92209	47.63	Escherichia coli O157:H7 strain F8798 plasmid pF8798-1, complete sequence.
NZ_CP066754	89397	50.36	Escherichia coli O157:H7 strain ECP19-598 plasmid unnamed1, complete sequence.
NZ_CP066755	114710	46.53	Escherichia coli O157:H7 strain ECP19-598 plasmid unnamed2, complete sequence.
NZ_CP015854	92854	47.81	Escherichia coli strain ATCC 43889 plasmid unnamed, complete sequence.
NZ_CP038348	89216	47.48	Escherichia coli O157:H7 strain G5295 plasmid pG5295-1, complete sequence.
NZ_CP038347	89068	50.38	Escherichia coli O157:H7 strain G5295 plasmid pG5295-2, complete sequence.
NZ_CP015021	81401	48.15	Escherichia coli strain 28RC1 plasmid p28RC1, complete sequence.
NZ_CP062767	92793	47.83	Escherichia coli O157:H7 strain Z866 plasmid pZ866-1, complete sequence.
NZ_CP062768	3306	43.41	Escherichia coli O157:H7 strain Z866 plasmid pZ866-2, complete sequence.
NZ_CP062722	92718	47.83	Escherichia coli O157:H7 strain Z1815 plasmid pZ1815-1, complete sequence.
NZ_CP028595	95624	48.04	Escherichia coli strain 150 plasmid pTA150, complete sequence.
NZ_CP028594	40334	40.97	Escherichia coli strain 150 plasmid pTA150-2, complete sequence.
NZ_CP028593	2679	45.99	Escherichia coli strain 150 plasmid pTA150-3, complete sequence.
NZ_CP062720	92734	47.83	Escherichia coli O157:H7 strain Z1816 plasmid pZ1816-1, complete sequence.
NZ_CP044146	92722	47.6	Escherichia coli O157 strain AR-0428 plasmid pAR-0428-1, complete sequence.
NZ_CP044147	46899	47.23	Escherichia coli O157 strain AR-0428 plasmid pAR-0428-2.
NZ_CP034386	6673	50.19	Escherichia coli O157:H7 strain FRIK804 plasmid pFRIK804-01, complete sequence.
NZ_CP034387	4091	49.57	Escherichia coli O157:H7 strain FRIK804 plasmid pFRIK804-02, complete sequence.
NZ_CP034388	3305	43.42	Escherichia coli O157:H7 strain FRIK804 plasmid pFRIK804-03, complete sequence.
NZ_CP034385	92697	47.59	Escherichia coli O157:H7 strain FRIK804 plasmid pO157, complete sequence.
NZ_CP032804	91253	47.71	Escherichia coli strain ERL05-1306 plasmid pERL05-1306, complete sequence.
NZ_CP062772	92751	47.83	Escherichia coli O157:H7 strain Z570 plasmid pZ570-1, complete sequence.
NZ_CP062773	3306	43.41	Escherichia coli O157:H7 strain Z570 plasmid pZ570-2, complete sequence.
NZ_CP045976	94640	47.91	Escherichia coli strain AUSMDU00002545 plasmid pAUSMDU00002545_01, complete sequence.
NZ_CP038420	98042	48.25	Escherichia coli O157:H7 strain 2-6-2 plasmid pEX262-1, complete sequence.
NZ_CP022051	42641	41.74	Escherichia coli O157 strain FDAARGOS_293 plasmid unnamed1, complete sequence.
NZ_CP022052	95288	47.98	Escherichia coli O157 strain FDAARGOS_293 plasmid unnamed2, complete sequence.
NZ_CP008958	92076	47.64	Escherichia coli O157:H7 str. EDL933 plasmid unnamed, complete sequence.
NZ_CP032796	90978	47.77	Escherichia coli strain ERL06-2503 plasmid pERL06-2503, complete sequence.
NZ_CP038301	94294	47.96	Escherichia coli O157:H7 strain SS TX 754-1 plasmid pTX754-1, complete sequence.
NZ_CP038286	100480	48.46	Escherichia coli O157:H7 strain YB14-1 plasmid pYB14-1, complete sequence.
NZ_CP038285	2679	45.99	Escherichia coli O157:H7 strain YB14-1 plasmid pYB14-2, complete sequence.
NZ_CP038359	92704	47.6	Escherichia coli O157:H7 strain F7508 plasmid pF7508-1, complete sequence.
NZ_CP038358	3306	43.41	Escherichia coli O157:H7 strain F7508 plasmid pF7508-2, complete sequence.
NZ_CP062718	96507	48.13	Escherichia coli O157:H7 strain Z1825 plasmid pZ1825-1, complete sequence.
NZ_CP034807	91176	47.56	Escherichia coli strain 2010C-3347 plasmid p2010C-3347, complete sequence.
NZ_CP038415	92490	47.82	Escherichia coli O157:H7 strain 17B6-2 plasmid p17B6-1, complete sequence.
NZ_CP040306	95621	48.04	Escherichia coli strain HB6 plasmid pO157, complete sequence.
NZ_CP033632	147451	51.38	Escherichia coli isolate ECCNB12-2 plasmid pTB-nb1, complete sequence.
NZ_CP033633	139752	51.62	Escherichia coli isolate ECCNB12-2 plasmid pTB-nb2, complete sequence.
NZ_CP033634	82252	51.44	Escherichia coli isolate ECCNB12-2 plasmid pTB-nb3, complete sequence.
NZ_CP033636	253793	46.8	Escherichia coli isolate ECCNB12-2 plasmid pTB-nb4, complete sequence.
NZ_CP062779	90783	47.57	Escherichia coli O157:H7 strain Z1836 plasmid pZ1836-1, complete sequence.
NZ_CP062762	92756	47.83	Escherichia coli O157:H7 strain Z887 plasmid pZ887-1, complete sequence.
NZ_CP031917	95228	47.24	Escherichia coli O45:H2 strain FWSEC0003 plasmid unnamed11, complete sequence.
NZ_CP031918	52940	48.84	Escherichia coli O45:H2 strain FWSEC0003 plasmid unnamed12, complete sequence.
NZ_CP044149	74819	51.83	Escherichia coli O157 strain AR-0427 plasmid pAR-0427-1.
NZ_CP044150	85887	47.97	Escherichia coli O157 strain AR-0427 plasmid pAR-0427-2.
NZ_CP038371	92990	47.77	Escherichia coli O157:H7 strain F6321 plasmid pF6321-1, complete sequence.
NZ_CP038370	2731	47.24	Escherichia coli O157:H7 strain F6321 plasmid pF6321-2, complete sequence.
NZ_CP034809	94980	47.93	Escherichia coli strain 08-3914 plasmid p08-3914, complete sequence.
NZ_CP062764	92164	47.84	Escherichia coli O157:H7 strain Z885 plasmid pZ885-1, complete sequence.
NZ_CP062765	3306	43.41	Escherichia coli O157:H7 strain Z885 plasmid pZ885-2, complete sequence.
NC_013010	94601	47.89	Escherichia coli O157:H7 str. TW14359 plasmid pO157, complete sequence.
NZ_CP017670	92755	47.58	Escherichia coli strain PA20 plasmid pO157, complete sequence.
NZ_CP066749	95679	50.12	Escherichia coli O157:H7 strain ECP19-2498 plasmid unnamed1, complete sequence.
NZ_CP066750	95598	48.04	Escherichia coli O157:H7 strain ECP19-2498 plasmid unnamed2, complete sequence.
NZ_CP066751	8119	49.69	Escherichia coli O157:H7 strain ECP19-2498 plasmid unnamed3, complete sequence.
NZ_CP066752	6675	50.35	Escherichia coli O157:H7 strain ECP19-2498 plasmid unnamed4, complete sequence.
NZ_CP008806	94645	47.88	Escherichia coli O157:H7 str. SS17 plasmid p0157, complete sequence.
NZ_CP008807	37447	39.72	Escherichia coli O157:H7 str. SS17 plasmid pSS17, complete sequence.
NZ_CP038379	93180	47.81	Escherichia coli O157:H7 strain F1273 plasmid pF1273-1, complete sequence.
NZ_CP038377	7324	50.22	Escherichia coli O157:H7 strain F1273 plasmid pF1273-2, complete sequence.
NZ_CP038378	99810	47.77	Escherichia coli O157:H7 strain F1273 plasmid pF1273-3, complete sequence.
NZ_CP062716	96505	48.13	Escherichia coli O157:H7 strain Z1826 plasmid pZ1826-1, complete sequence.
NZ_CP038356	98062	48.25	Escherichia coli O157:H7 str. F8092B plasmid pF8092B-1, complete sequence.
NZ_CP062709	92743	47.83	Escherichia coli O157:H7 strain Z1832 plasmid pZ1832-1, complete sequence.
NZ_CP062710	35980	39.9	Escherichia coli O157:H7 strain Z1832 plasmid pZ1832-2, complete sequence.
NZ_CP062712	92741	47.83	Escherichia coli O157:H7 strain Z1831 plasmid pZ1831-1, complete sequence.
NZ_CP062706	92741	47.83	Escherichia coli O157:H7 strain Z1833 plasmid pZ1833-1, complete sequence.
NZ_CP062707	35988	39.89	Escherichia coli O157:H7 strain Z1833 plasmid pZ1833-2, complete sequence.
NZ_CP062724	92747	47.82	Escherichia coli O157:H7 strain Z1814 plasmid pZ1814-1, complete sequence.
NZ_CP038364	92700	47.6	Escherichia coli O157:H7 strain F7349 plasmid pF7349-1, complete sequence.
NZ_CP038365	3306	43.41	Escherichia coli O157:H7 strain F7349 plasmid pF7349-2, complete sequence.
NZ_CP032802	90995	47.76	Escherichia coli strain ERL06-2442 plasmid pERL06-2442, complete sequence.
NZ_CP062714	92742	47.83	Escherichia coli O157:H7 strain Z1830 plasmid pZ1830-1, complete sequence.
NZ_CP040108	93190	47.81	Escherichia coli O157:H7 strain MB9-1 plasmid pMB9_1, complete sequence.
NZ_CP040109	6042	46.41	Escherichia coli O157:H7 strain MB9-1 plasmid pMB9_2, complete sequence.
NZ_CP040110	37889	40.05	Escherichia coli O157:H7 strain MB9-1 plasmid pMB9_3, complete sequence.
NZ_CP062756	92759	47.83	Escherichia coli O157:H7 strain Z903 plasmid pZ903-1, complete sequence.
NZ_CP062757	3306	43.41	Escherichia coli O157:H7 strain Z903 plasmid pZ903-2, complete sequence.
NZ_CP062743	92746	47.83	Escherichia coli O157:H7 strain Z1626 plasmid pZ1626-1, complete sequence.
NZ_CP018253	95229	48.05	Escherichia coli strain 9000 plasmid pO157, complete sequence.
NZ_CP062750	94070	47.91	Escherichia coli O157:H7 strain Z1486 plasmid pZ1486-1, complete sequence.
NZ_CP062751	3306	43.41	Escherichia coli O157:H7 strain Z1486 plasmid pZ1486-2, complete sequence.
NZ_CP062745	95227	48.05	Escherichia coli O157:H7 strain Z1615 plasmid pZ1615-1, complete sequence.
NZ_CP038368	93665	47.85	Escherichia coli O157:H7 strain F6667 plasmid pF6667-1, complete sequence.
NZ_CP038367	39233	40.45	Escherichia coli O157:H7 strain F6667 plasmid pF6667-2, complete sequence.
NZ_CP062737	95229	48.05	Escherichia coli O157:H7 strain Z1766 plasmid pZ1766-1, complete sequence.
NZ_CP062738	3306	43.41	Escherichia coli O157:H7 strain Z1766 plasmid pZ1766-2, complete sequence.
NZ_CP062732	95229	48.05	Escherichia coli O157:H7 strain Z1768 plasmid pZ1768-1, complete sequence.
NZ_CP062781	95224	48.06	Escherichia coli O157:H7 strain Z1769 plasmid pZ1769-1, complete sequence.
NZ_CP062734	95227	48.05	Escherichia coli O157:H7 strain Z1767 plasmid pZ1767-1, complete sequence.
NZ_CP062735	3306	43.41	Escherichia coli O157:H7 strain Z1767 plasmid pZ1767-2, complete sequence.
NZ_CP062728	92757	47.83	Escherichia coli O157:H7 strain Z1812 plasmid pZ1812-1, complete sequence.
NZ_CP018246	95341	47.99	Escherichia coli strain 472 plasmid pO157, complete sequence.
NZ_CP038327	92704	47.6	Escherichia coli O157:H7 strain NE 1169-1 plasmid pNE1169-1, complete sequence.
NZ_CP038325	6673	50.19	Escherichia coli O157:H7 strain NE 1169-1 plasmid pNE1169-2, complete sequence.
NZ_CP038326	145329	52.27	Escherichia coli O157:H7 strain NE 1169-1 plasmid pNE1169-3, complete sequence.
NZ_CP038323	92701	47.6	Escherichia coli O157:H7 strain NE1127 plasmid pNE1127-1, complete sequence.
NZ_CP038322	145329	52.27	Escherichia coli O157:H7 strain NE1127 plasmid pNE1127-2, complete sequence.
NZ_CP018238	91420	47.73	Escherichia coli strain 155 plasmid pO157, complete sequence.
NZ_CP038283	93247	47.81	Escherichia coli O157:H7 strain F8492 plasmid pF8492-1, complete sequence.
NZ_CP038338	119161	49.71	Escherichia coli O157:H7 strain LSU61 plasmid pLSU61-1, complete sequence.
NZ_CP038337	37777	39.91	Escherichia coli O157:H7 strain LSU61 plasmid pLSU61-2, complete sequence.
NZ_CP062730	92757	47.83	Escherichia coli O157:H7 strain Z1811 plasmid pZ1811-1, complete sequence.
NZ_CP046526	98304	47.66	Escherichia coli strain RM19259 plasmid pRM19259, complete sequence.
NZ_CP027547	95367	47.76	Escherichia coli strain 2013C-4187 plasmid unnamed, complete sequence.
NZ_CP015833	240662	46.65	Escherichia coli O157 strain 180-PT54 plasmid unnamed, complete sequence.
NZ_CP028684	92725	47.6	Escherichia coli strain 112 plasmid pTA112, complete sequence.
NZ_CP028686	92724	47.6	Escherichia coli strain 111 plasmid pTA111, complete sequence.
NZ_CP039835	93704	47.88	Escherichia coli O157:H7 strain MB41-1 plasmid pMB41_1, complete sequence.
NZ_CP039836	3306	43.44	Escherichia coli O157:H7 strain MB41-1 plasmid pMB41_2, complete sequence.
NZ_CP062759	92766	47.83	Escherichia coli O157:H7 strain Z892 plasmid pZ892-1, complete sequence.
NZ_CP062760	3306	43.41	Escherichia coli O157:H7 strain Z892 plasmid pZ892-2, complete sequence.
NZ_CP015022	95170	47.76	Escherichia coli strain SRCC 1675 plasmid pSRCC 1675, complete sequence.
NZ_CP028606	95648	48.03	Escherichia coli strain 144 plasmid pTA144, complete sequence.
NZ_CP028605	40350	40.98	Escherichia coli strain 144 plasmid pTA144-2, complete sequence.
NZ_CP028604	2678	45.97	Escherichia coli strain 144 plasmid pTA144-3, complete sequence.
NZ_CP038335	94694	47.98	Escherichia coli O157:H7 strain N8B7-2 plasmid pN8B7-1, complete sequence.
NZ_CP038334	58668	42.56	Escherichia coli O157:H7 strain N8B7-2 plasmid pN8B7-2.
NZ_CP032798	92743	47.6	Escherichia coli strain ERL06-2497 plasmid pERL06-2497-1, complete sequence.
NZ_CP032799	63089	51.99	Escherichia coli strain ERL06-2497 plasmid pERL06-2497-2, complete sequence.
NZ_CP032800	3306	43.41	Escherichia coli strain ERL06-2497 plasmid pERL06-2497-3, complete sequence.
NZ_CP062753	92772	47.83	Escherichia coli O157:H7 strain Z910 plasmid pZ910-1, complete sequence.
NZ_CP062754	3306	43.41	Escherichia coli O157:H7 strain Z910 plasmid pZ910-2, complete sequence.
NZ_CP062747	92765	47.83	Escherichia coli O157:H7 strain Z1504 plasmid pZ1504-1, complete sequence.
NZ_CP062748	3306	43.41	Escherichia coli O157:H7 strain Z1504 plasmid pZ1504-2, complete sequence.
NZ_CP032790	93284	47.82	Escherichia coli strain NZRM4169 plasmid pNZRM4169, complete sequence.
NZ_CP062775	92772	47.83	Escherichia coli O157:H7 strain Z563 plasmid pZ563-1, complete sequence.
NZ_CP062776	35476	40.17	Escherichia coli O157:H7 strain Z563 plasmid pZ563-2, complete sequence.
NZ_CP062777	3306	43.41	Escherichia coli O157:H7 strain Z563 plasmid pZ563-3, complete sequence.
NZ_CP038497	92710	47.6	Escherichia coli O157:H7 strain TT12A plasmid pO157, complete sequence.
NZ_CP027220	94104	47.75	Escherichia coli strain 2015C-3163 plasmid unnamed, complete sequence.
NZ_CP038293	95611	48.04	Escherichia coli O157:H7 strain TB21-1 plasmid pTB21-1, complete sequence.
NZ_CP038294	3171	46.8	Escherichia coli O157:H7 strain TB21-1 plasmid pTB21-2, complete sequence.
NZ_CP062161	104844	47.72	Escherichia coli strain 20R2R plasmid punnamed1, complete sequence.
CP012497	136480	49.44	Escherichia coli strain 06-00048 plasmid pCFSAN004178P_01, complete sequence.
NZ_CP012498	213847	45.82	Escherichia coli strain 06-00048 isolate CFSAN004178 plasmid pCFSAN004178P_02, complete sequence.
NZ_CP044137	88229	50.28	Escherichia coli O157 strain AR-0430 plasmid pAR-0430-1, complete sequence.
NZ_CP044138	34677	41.19	Escherichia coli O157 strain AR-0430 plasmid pAR-0430-2, complete sequence.
NZ_CP044139	92728	47.59	Escherichia coli O157 strain AR-0430 plasmid pAR-0430-3, complete sequence.
NZ_CP044141	50155	49.66	Escherichia coli O157 strain AR-0430 plasmid pAR-0430-4.
NZ_CP034804	83424	50.19	Escherichia coli strain 2009C-3554 plasmid p2009C-3554-1, complete sequence.
NZ_CP034805	94014	47.69	Escherichia coli strain 2009C-3554 plasmid p2009C-3554-2, complete sequence.
NZ_CP038343	92743	47.59	Escherichia coli O157:H7 strain H2495 plasmid pH2495-1, complete sequence.
NZ_CP040308	95642	48.04	Escherichia coli strain F1 E4 plasmid pO157, complete sequence.
NZ_CP038424	96931	48.1	Escherichia coli O157:H7 strain 7409 plasmid p7409-1, complete sequence.
NZ_CP026724	129627	48.19	Escherichia coli strain 266917_2 plasmid p266917_2_01, complete sequence.
NZ_CP026725	97124	47.74	Escherichia coli strain 266917_2 plasmid p266917_2_02, complete sequence.
NZ_CP026726	83010	49.87	Escherichia coli strain 266917_2 plasmid p266917_2_03, complete sequence.
NZ_CP026727	51479	46.37	Escherichia coli strain 266917_2 plasmid p266917_2_04, complete sequence.
NZ_CP026728	33288	41.77	Escherichia coli strain 266917_2 plasmid p266917_2_05, complete sequence.
NZ_CP044142	152532	52.48	Escherichia coli O157 strain AR-0429 plasmid pAR-0429-1, complete sequence.
NZ_CP044144	92690	47.6	Escherichia coli O157 strain AR-0429 plasmid pAR-0429-2, complete sequence.
NZ_CP038308	93167	47.81	Escherichia coli O157:H7 strain SS NE 1040-1 plasmid pNE1040-1, complete sequence.
NZ_CP038306	6042	46.41	Escherichia coli O157:H7 strain SS NE 1040-1 plasmid pNE1040-2, complete sequence.
NZ_CP038307	38515	40.96	Escherichia coli O157:H7 strain SS NE 1040-1 plasmid pNE1040-3, complete sequence.
NZ_CP062701	90792	47.57	Escherichia coli O157:H7 strain Z1835 plasmid pZ1835-1, complete sequence.
NZ_CP027767	66545	50.83	Escherichia coli strain 2013C-3342 plasmid unnamed, complete sequence.
NZ_CP010305	94730	47.87	Escherichia coli O157:H7 str. SS52 plasmid p0157, complete sequence.
NZ_CP064168	3306	43.41	Escherichia coli O157:H7 strain Wll001 plasmid unnamed1, complete sequence.
NZ_CP064169	95164	47.76	Escherichia coli O157:H7 strain Wll001 plasmid unnamed2.
NZ_CP027545	101089	49.01	Escherichia coli strain 2013C-3264 plasmid unnamed, complete sequence.
NZ_CP038413	121214	49.7	Escherichia coli O157:H7 strain 493/89 plasmid p493-89-1, complete sequence.
NZ_CP018625	111755	51.06	Escherichia coli strain FORC_044 plasmid pFORC44_1, complete sequence.
NZ_CP018626	107692	47.62	Escherichia coli strain FORC_044 plasmid pFORC44_2, complete sequence.
NZ_CP062703	95141	48	Escherichia coli O157:H7 strain Z1834 plasmid pZ1834-1, complete sequence.
NZ_CP062704	55197	50.37	Escherichia coli O157:H7 strain Z1834 plasmid pZ1834-2, complete sequence.
NZ_CP035546	94581	47.89	Escherichia coli strain FSIS11705876 plasmid pO157, complete sequence.
NZ_CP034800	94606	47.89	Escherichia coli strain 2009C-4687 plasmid p2009C-4687, complete sequence.
NZ_CP034802	94586	47.89	Escherichia coli strain 2010C-3142 plasmid p2010C-3142, complete sequence.
NZ_CP038354	91510	47.76	Escherichia coli O157:H7 strain F8797 plasmid pF8797-1, complete sequence.
NZ_CP015816	95910	47.97	Escherichia coli O157:H7 strain JEONG-1266 plasmid p0157, complete sequence.
NZ_CP038341	92839	47.82	Escherichia coli O157:H7 strain H6437 plasmid pH6437-1, complete sequence.
NZ_CP038340	56083	42.2	Escherichia coli O157:H7 strain H6437 plasmid pH6437-2.
NZ_CP038429	92703	47.6	Escherichia coli O157:H7 strain 611 plasmid p611-1, complete sequence.
NZ_CP038430	3306	43.41	Escherichia coli O157:H7 strain 611 plasmid p611-2, complete sequence.
NZ_CP040573	94177	47.9	Escherichia coli O157:H7 strain ECP17-46 plasmid pCFSAN059540, complete sequence.
NZ_CP038418	94184	47.9	Escherichia coli O157:H7 strain 3-5-1 plasmid pGM351-1, complete sequence.
NZ_CP038417	89216	50.01	Escherichia coli O157:H7 strain 3-5-1 plasmid pGM351-2, complete sequence.
NZ_CP018242	92495	47.82	Escherichia coli strain 319 plasmid pO157, complete sequence.
NZ_CP018240	94170	47.9	Escherichia coli strain 272 plasmid pO157, complete sequence.
NZ_CP031344	90831	47.67	Escherichia coli O145 strain RM12367-C1 plasmid pRM12367-C1, complete sequence.
NZ_CP038382	91912	47.79	Escherichia coli O157:H7 strain E32511 plasmid pE32511-1, complete sequence.
NZ_CP038381	58509	42.19	Escherichia coli O157:H7 strain E32511 plasmid pE32511-2.
NZ_AP018797	125200	53.23	Escherichia coli strain E2855 plasmid pE2855-1, complete sequence.
NZ_AP018798	94446	46.77	Escherichia coli strain E2855 plasmid pE2855-2, complete sequence.
NZ_AP018799	92697	53.06	Escherichia coli strain E2855 plasmid pE2855-3, complete sequence.
NZ_AP018800	81004	50.14	Escherichia coli strain E2855 plasmid pE2855-4, complete sequence.
NZ_AP018801	71289	51.02	Escherichia coli strain E2855 plasmid pE2855-5, complete sequence.
NZ_CP021340	86917	47.76	Escherichia coli strain 95NR1 plasmid p95NR1A, complete sequence.
NZ_CP021341	81853	50.27	Escherichia coli strain 95NR1 plasmid p95NR1B, complete sequence.
NZ_CP038410	92693	47.6	Escherichia coli O157:H7 strain 86-24 plasmid p86-24-1, complete sequence.
NZ_CP038409	30925	39.87	Escherichia coli O157:H7 strain 86-24 plasmid p86-24-2, complete sequence.
NZ_CP038411	3306	43.41	Escherichia coli O157:H7 strain 86-24 plasmid p86-24-3, complete sequence.
NZ_CP017250	92690	47.6	Escherichia coli strain NADC 5570/86-24/6565 isolate mutant plasmid pO157, complete sequence.
NZ_CP017252	92691	47.6	Escherichia coli strain NADC 5570/86-24/6564 isolate wild type plasmid pO157, complete sequence.
NZ_CP028694	92730	47.6	Escherichia coli strain 108 plasmid pTA108, complete sequence.
NZ_CP066760	118266	46.65	Escherichia coli O157:H7 strain ECP19-198 plasmid unnamed1, complete sequence.
NZ_CP066761	3306	43.41	Escherichia coli O157:H7 strain ECP19-198 plasmid unnamed2, complete sequence.
NZ_CP040315	95631	48.04	Escherichia coli strain MA11 plasmid pO157, complete sequence.
NZ_CP038314	97630	48.06	Escherichia coli O157:H7 strain OK1 plasmid pOK1-1, complete sequence.
NZ_CP038315	3306	43.41	Escherichia coli O157:H7 strain OK1 plasmid pOK1-2, complete sequence.
NZ_CP028701	92738	47.6	Escherichia coli strain 105 plasmid pTA105, complete sequence.
NZ_CP038406	92740	47.6	Escherichia coli O157:H7 strain ATCC 35150 plasmid pATCC35150-1, complete sequence.
NZ_CP038407	3306	43.41	Escherichia coli O157:H7 strain ATCC 35150 plasmid pATCC35150-2, complete sequence.
NZ_CP062770	95208	48.05	Escherichia coli O157:H7 strain Z852 plasmid pZ852-1, complete sequence.
NZ_CP028653	92739	47.6	Escherichia coli strain 123 plasmid pTA123, complete sequence.
NZ_CP038422	94959	48.06	Escherichia coli O157:H7 strain 7636 plasmid p7636-1, complete sequence.
NZ_CP035773	88752	47.74	Escherichia coli O145 strain RM8843-C1 plasmid pRM8843-C1, complete sequence.
NZ_CP035771	88752	47.74	Escherichia coli O145 strain RM8988-C1 plasmid pRM8988-C1, complete sequence.
NZ_CP031354	88747	47.74	Escherichia coli O145 strain RM8995-C1 plasmid pRM8995-C1, complete sequence.
NZ_CP040571	92763	47.59	Escherichia coli O157:H7 strain ECP17-1298 plasmid pCFSAN059541, complete sequence.
NZ_CP028651	94057	47.68	Escherichia coli strain 124 plasmid pTA124, complete sequence.
NZ_CP038289	96920	48.12	Escherichia coli O157:H7 strain TX 376-2 plasmid pTX376-1, complete sequence.
NZ_CP038288	99810	47.79	Escherichia coli O157:H7 strain TX 376-2 plasmid pTX376-2, complete sequence.
NZ_CP028631	94492	47.89	Escherichia coli strain 136 plasmid pTA136, complete sequence.
NZ_CP028630	6078	46.36	Escherichia coli strain 136 plasmid pTA136-2, complete sequence.
NZ_CP028619	94487	47.89	Escherichia coli strain 140 plasmid pTA140, complete sequence.
NZ_CP028618	6078	46.36	Escherichia coli strain 140 plasmid pTA140-2, complete sequence.
NZ_CP028670	94491	47.89	Escherichia coli strain 117 plasmid pTA117, complete sequence.
NZ_CP028669	6078	46.36	Escherichia coli strain 117 plasmid pTA117-2, complete sequence.
NZ_CP028661	94493	47.89	Escherichia coli strain 120 plasmid pTA120, complete sequence.
NZ_CP028660	6078	46.36	Escherichia coli strain 120 plasmid pTA120-2, complete sequence.
NZ_CP028625	94493	47.89	Escherichia coli strain 138 plasmid pTA138, complete sequence.
NZ_CP028624	6078	46.36	Escherichia coli strain 138 plasmid pTA138-2, complete sequence.
NZ_CP028658	94491	47.89	Escherichia coli strain 121 plasmid pTA121, complete sequence.
NZ_CP028657	6078	46.36	Escherichia coli strain 121 plasmid pTA121-2, complete sequence.
NZ_CP028628	94492	47.89	Escherichia coli strain 137 plasmid pTA137, complete sequence.
NZ_CP028627	6078	46.36	Escherichia coli strain 137 plasmid pTA137-2, complete sequence.
NZ_CP066757	127648	47.34	Escherichia coli O157:H7 strain ECP19-798 plasmid unnamed1, complete sequence.
NZ_CP066758	3306	43.38	Escherichia coli O157:H7 strain ECP19-798 plasmid unnamed2, complete sequence.
NZ_CP028616	94495	47.89	Escherichia coli strain 141 plasmid pTA141, complete sequence.
NZ_CP028615	6078	46.36	Escherichia coli strain 141 plasmid pTA141-2, complete sequence.
NZ_CP038375	91076	47.8	Escherichia coli O157:H7 strain F3113 plasmid pF3113-1, complete sequence.
NZ_CP028655	92732	47.6	Escherichia coli strain 122 plasmid pTA122, complete sequence.
NZ_CP028649	93179	47.8	Escherichia coli strain 130 plasmid pTA130, complete sequence.
NZ_CP028648	6078	46.35	Escherichia coli strain 130 plasmid pTA130-2, complete sequence.
NZ_CP028646	93179	47.8	Escherichia coli strain 131 plasmid pTA131, complete sequence.
NZ_CP028645	6078	46.35	Escherichia coli strain 131 plasmid pTA131-2, complete sequence.
NZ_CP028673	93184	47.8	Escherichia coli strain 116 plasmid pTA116, complete sequence.
NZ_CP028672	6078	46.35	Escherichia coli strain 116 plasmid pTA116-2, complete sequence.
NZ_CP028634	93186	47.8	Escherichia coli strain 135 plasmid pTA135, complete sequence.
NZ_CP028633	6078	46.35	Escherichia coli strain 135 plasmid pTA135-2, complete sequence.
NZ_CP028643	93185	47.8	Escherichia coli strain 132 plasmid pTA132, complete sequence.
NZ_CP028642	6078	46.35	Escherichia coli strain 132 plasmid pTA132-2, complete sequence.
NZ_CP028637	93181	47.8	Escherichia coli strain 134 plasmid pTA134, complete sequence.
NZ_CP028636	6078	46.35	Escherichia coli strain 134 plasmid pTA134-2, complete sequence.
NZ_CP028679	93182	47.8	Escherichia coli strain 114 plasmid pTA114, complete sequence.
NZ_CP028678	6078	46.35	Escherichia coli strain 114 plasmid pTA114-2, complete sequence.
NZ_CP028640	93179	47.8	Escherichia coli strain 133 plasmid pTA133, complete sequence.
NZ_CP028639	6078	46.35	Escherichia coli strain 133 plasmid pTA133-2, complete sequence.
NZ_CP028622	93171	47.81	Escherichia coli strain 139 plasmid pTA139, complete sequence.
NZ_CP028621	6078	46.35	Escherichia coli strain 139 plasmid pTA139-2, complete sequence.
NZ_CP028667	93175	47.8	Escherichia coli strain 118 plasmid pTA118, complete sequence.
NZ_CP028666	6078	46.35	Escherichia coli strain 118 plasmid pTA118-2, complete sequence.
NZ_CP028664	93176	47.8	Escherichia coli strain 119 plasmid pTA118, complete sequence.
NZ_CP028663	6078	46.35	Escherichia coli strain 119 plasmid pTA118-2, complete sequence.
NZ_CP038320	95338	48.05	Escherichia coli O157:H7 strain NE122 plasmid pNE122-1, complete sequence.
NZ_CP035367	97494	48.14	Escherichia coli O157:H7 strain C1-057 plasmid pC1-057, complete sequence.
NZ_CP028682	93180	47.8	Escherichia coli strain 113 plasmid pTA113, complete sequence.
NZ_CP028681	6078	46.35	Escherichia coli strain 113 plasmid pTA113-2, complete sequence.
NZ_CP034795	94987	47.93	Escherichia coli strain 06-3462 plasmid p06-3462, complete sequence.
NC_013354	75546	49.11	Escherichia coli O103:H2 str. 12009 plasmid pO103, complete sequence.
NZ_CP040317	93331	47.82	Escherichia coli strain CV261 plasmid pO157, complete sequence.
NZ_CP051657	74390	49.07	Escherichia coli strain SJ7 plasmid pSJ7-1.
NZ_CP051658	53543	49.19	Escherichia coli strain SJ7 plasmid pSJ7-2.
NZ_CP028697	92718	47.59	Escherichia coli strain 107 plasmid pTA107, complete sequence.
NZ_CP028696	6676	50.4	Escherichia coli strain 107 plasmid pTA107-2, complete sequence.
NZ_CP028692	92714	47.6	Escherichia coli strain 109 plasmid pTA109, complete sequence.
NZ_CP028691	6676	50.4	Escherichia coli strain 109 plasmid pTA109-2, complete sequence.
NZ_CP028689.1	92718	47.59	Escherichia coli strain 110 plasmid pTA110, complete sequence
NZ_CP028688	6676	50.4	Escherichia coli strain 110 plasmid pTA110-2, complete sequence.
NZ_CP027350	97117	46.84	Escherichia coli strain 2014C-3655 plasmid unnamed.
NZ_CP027389	68062	49.18	Escherichia coli strain 2011C-4251 plasmid unnamed.
NZ_CP027332	20839	53.33	Escherichia coli strain 2013C-3277 plasmid unnamed1.
NZ_CP027333	46866	48.71	Escherichia coli strain 2013C-3277 plasmid unnamed2.
NZ_CP027334	181066	49.15	Escherichia coli strain 2013C-3277 plasmid unnamed3.
NZ_CP028699	92729	47.6	Escherichia coli strain 106 plasmid pTA106, complete sequence.
NZ_CP017441	92729	47.6	Escherichia coli O157:H7 strain 3384 plasmid pO157, complete sequence.
NZ_CP017445	92726	47.6	Escherichia coli O157:H7 strain 8368 plasmid pO157, complete sequence.
NZ_CP037942	157534	48.43	Escherichia coli strain CFSAN027350 plasmid pCFSAN027350, complete sequence.
NZ_CP018990	150994	52.71	Escherichia coli strain Ecol_AZ146 plasmid pECAZ146_1, complete sequence.
NZ_CP018988	34532	48.54	Escherichia coli strain Ecol_AZ146 plasmid pECAZ146_3, complete sequence.
NZ_CP018987	6994	47.53	Escherichia coli strain Ecol_AZ146 plasmid pECAZ146_4, complete sequence.
NZ_CP018986	6075	49.32	Escherichia coli strain Ecol_AZ146 plasmid pECAZ146_5, complete sequence.
NZ_CP018985	5631	47.38	Escherichia coli strain Ecol_AZ146 plasmid pECAZ146_6, complete sequence.
NZ_CP018984	2571	44.42	Escherichia coli strain Ecol_AZ146 plasmid pECAZ146_7, complete sequence.
NZ_CP018989	85865	54.45	Escherichia coli strain Ecol_AZ146 plasmid pECAZ146_KPC, complete sequence.
NZ_CP027553	67055	50.75	Escherichia coli strain 2015C-4498 plasmid unnamed, complete sequence.
NZ_CP039843	95647	48.16	Escherichia coli O157:H7 strain USDA5905 plasmid pUSDA5905_1.
NZ_CP039842	62787	48.9	Escherichia coli O157:H7 strain USDA5905 plasmid pUSDA5905_2, complete sequence.
NZ_CP039841	6200	52.56	Escherichia coli O157:H7 strain USDA5905 plasmid pUSDA5905_3, complete sequence.
NZ_CP039840	6265	44.63	Escherichia coli O157:H7 strain USDA5905 plasmid pUSDA5905_4, complete sequence.
NZ_CP039839	4656	42.93	Escherichia coli O157:H7 strain USDA5905 plasmid pUSDA5905_5.
NZ_CP039838	3371	55.03	Escherichia coli O157:H7 strain USDA5905 plasmid pUSDA5905_6, complete sequence.
NZ_CP015242	66029	48.94	Escherichia coli strain 2013C-4465 plasmid unnamed1, complete sequence.
NZ_CP018251	91789	47.91	Escherichia coli strain 10671 plasmid pO157, complete sequence.
NZ_CP034796	94189	47.9	Escherichia coli strain 08-3918 plasmid p08-3918-1, complete sequence.
NZ_CP034798	42137	42.63	Escherichia coli strain 08-3918 plasmid p08-3918-2.
NZ_CP028612	92725	47.6	Escherichia coli strain 142 plasmid pTA142, complete sequence.
NZ_CP028611	88018	52.43	Escherichia coli strain 142 plasmid pTA142-2, complete sequence.
NZ_CP028610	67786	50.97	Escherichia coli strain 142 plasmid pTA142-3, complete sequence.
NZ_CP028613	3306	43.41	Escherichia coli strain 142 plasmid pTA142-4.
NZ_CP032812	90979	47.76	Escherichia coli strain ERL03-1416 plasmid pERL03-1416-1, complete sequence.
NZ_CP032813	62779	51.81	Escherichia coli strain ERL03-1416 plasmid pERL03-1416-2, complete sequence.
NZ_CP027324	127667	50.69	Escherichia coli strain 2013C-3033 plasmid unnamed, complete sequence.
NZ_CP025574	129195	49.05	Escherichia coli strain E-1246 plasmid pE1246_1, complete sequence.
NZ_CP025575	5878	46.53	Escherichia coli strain E-1246 plasmid pE1246_2, complete sequence.
NZ_CP028602	94611	47.89	Escherichia coli strain 147 plasmid pTA147, complete sequence.
NZ_CP028601	59888	42.1	Escherichia coli strain 147 plasmid pTA147-2, complete sequence.
NZ_CP028597	94610	47.89	Escherichia coli strain 149 plasmid pTA149, complete sequence.
NZ_CP028599	94607	47.89	Escherichia coli strain 148 plasmid pTA148, complete sequence.
NZ_CP034793	95421	47.98	Escherichia coli strain 2009C-3378 plasmid p2009C-3378, complete sequence.
NZ_CP035769	86875	47.71	Escherichia coli O145 strain RM11626-C1 plasmid pRM11626-C1, complete sequence.
NZ_CP035766	86874	47.71	Escherichia coli O145 strain RM12522-C8 plasmid pRM12522-C8, complete sequence.
NZ_CP017439	92596	47.82	Escherichia coli O157:H7 strain 2159 plasmid pO157, complete sequence.
NZ_CP017435	92624	47.84	Escherichia coli O157:H7 strain 1130 plasmid pO157, complete sequence.
NZ_CP032792	90310	47.62	Escherichia coli strain NZRM4165 plasmid pNZRM4165, complete sequence.
NZ_CP027574	48183	41.16	Escherichia coli strain 2013C-4081 plasmid unnamed1, complete sequence.
NZ_CP027575	95952	47.52	Escherichia coli strain 2013C-4081 plasmid unnamed2.
NZ_CP027576	78427	50.04	Escherichia coli strain 2013C-4081 plasmid unnamed3, complete sequence.
NZ_CP018244	92522	47.82	Escherichia coli strain 350 plasmid pO157, complete sequence.
NZ_CP032205	70275	52.27	Escherichia coli strain AR_0013 plasmid unnamed, complete sequence.
NZ_CP017447	92559	47.82	Escherichia coli O157:H7 strain 9234 plasmid pO157, complete sequence.
NZ_CP049202	167766	48.07	Escherichia coli strain PapRG-04-4 plasmid pIncFIB, complete sequence.
NZ_CP049203	4727	46.99	Escherichia coli strain PapRG-04-4 plasmid pcolRNA2, complete sequence.
NZ_CP038345	92577	47.82	Escherichia coli O157:H7 strain Gim1-1 plasmid pGM11-1, complete sequence.
NZ_CP031340	88744	47.74	Escherichia coli O145 strain RM12275-C1 plasmid pRM12275-C1, complete sequence.
NZ_CP017437	92565	47.82	Escherichia coli O157:H7 strain 2149 plasmid pO157, complete sequence.
NZ_CP038318	92578	47.82	Escherichia coli O157:H7 strain NE92 plasmid pNE92-1, complete sequence.
NZ_CP038317	38815	40.23	Escherichia coli O157:H7 strain NE92 plasmid pNE92-2, complete sequence.
NZ_CP031914	92754	47.55	Escherichia coli O157:H7 strain FWSEC0004 plasmid unnamed13, complete sequence.
NZ_CP031915	6675	50.28	Escherichia coli O157:H7 strain FWSEC0004 plasmid unnamed14, complete sequence.
NZ_CP022688	92032	47.54	Escherichia coli strain CDC#03-98 plasmid p0157, complete sequence.
NZ_CP017443	92583	47.82	Escherichia coli O157:H7 strain 4276 plasmid pO157, complete sequence.
NZ_CP038362	95928	47.97	Escherichia coli O157:H7 strain F7386 plasmid pF7386-1, complete sequence.
NZ_CP038361	58000	42.12	Escherichia coli O157:H7 strain F7386 plasmid pF7386-2.
NZ_CP007135	98067	49.68	Escherichia coli O145:H28 str. RM12761 plasmid pO145-12761, complete sequence.
NZ_CP007134	58666	42.44	Escherichia coli O145:H28 str. RM12761 plasmid pRM12761, complete sequence.
NZ_CP006263	98066	49.68	Escherichia coli O145:H28 str. RM13516 plasmid pO145-13516, complete sequence.
NZ_CP006264	58666	42.43	Escherichia coli O145:H28 str. RM13516 plasmid pRM13516, complete sequence.
NZ_CP040310	93175	47.81	Escherichia coli strain 21B8 plasmid pO157, complete sequence.
NZ_CP027381	24547	49.1	Escherichia coli strain 2013C-3250 plasmid unnamed1.
NZ_CP027382	36491	46.43	Escherichia coli strain 2013C-3250 plasmid unnamed2.
NZ_CP027383	73784	54.25	Escherichia coli strain 2013C-3250 plasmid unnamed3.
NZ_CP027384	27224	52.04	Escherichia coli strain 2013C-3250 plasmid unnamed4.
NZ_CP027385	118259	52.38	Escherichia coli strain 2013C-3250 plasmid unnamed5, complete sequence.
NZ_CP027436	83611	46.32	Escherichia coli strain 2014C-3599 plasmid unnamed, complete sequence.
NZ_CP038350	92716	47.59	Escherichia coli O157:H7 strain F8952 plasmid pF8952-1, complete sequence.
NZ_CP031911	80681	46.22	Escherichia coli O121:H19 strain FWSEC0006 plasmid unnamed15, complete sequence.
NZ_CP031909	73224	48.94	Escherichia coli O103:H2 strain FWSEC0007 plasmid unnamed16, complete sequence.
NZ_CP022408	81950	46.27	Escherichia coli O121:H19 strain 16-9255 plasmid punamed1, complete sequence.
NZ_CP028676	93174	47.8	Escherichia coli strain 115 plasmid pTA115, complete sequence.
NZ_CP028675	6078	46.35	Escherichia coli strain 115 plasmid pTA115-2, complete sequence.
NZ_CP032794	92653	47.72	Escherichia coli strain NZRM3614 plasmid pNZRM3614, complete sequence.
NZ_CP028111	83211	46.31	Escherichia coli O121 str. RM8352 plasmid pRM8352, complete sequence.
NZ_CP032806	92785	47.61	Escherichia coli strain ERL05-0623 plasmid pERL05-0623-1, complete sequence.
NZ_CP032807	3306	43.41	Escherichia coli strain ERL05-0623 plasmid pERL05-0623-2, complete sequence.
NZ_CP063493	101982	51.69	Escherichia coli strain EF5-18-41 plasmid pEF5-18-41_1, complete sequence.
NZ_CP063494	150711	51.36	Escherichia coli strain EF5-18-41 plasmid pEF5-18-41_2, complete sequence.
NZ_CP063495	56980	46.9	Escherichia coli strain EF5-18-41 plasmid pEF5-18-41_3, complete sequence.
NZ_CP063496	63909	42.32	Escherichia coli strain EF5-18-41 plasmid pEF5-18-41_4, complete sequence.
NZ_CP063497	8908	47.04	Escherichia coli strain EF5-18-41 plasmid pEF5-18-41_5, complete sequence.
NZ_CP063498	4237	55.46	Escherichia coli strain EF5-18-41 plasmid pEF5-18-41_6, complete sequence.
NZ_CP027318	81954	46.26	Escherichia coli strain 2015C-3107 plasmid unnamed, complete sequence.
NC_013942	66001	48.87	Escherichia coli O55:H7 str. CB9615 plasmid pO55, complete sequence.
NC_017907	92728	47.6	Escherichia coli Xuzhou21 plasmid pO157, complete sequence.
NC_017903	37785	40.55	Escherichia coli Xuzhou21 plasmid pO157_Sal, complete sequence.
NZ_CP028380	89518	47.57	Escherichia coli O145 str. RM9872 plasmid pRM9872-1, complete sequence.
NZ_CP024660	89518	47.57	Escherichia coli strain RM9872-C1 plasmid pRM9872-C1, complete sequence.
NZ_CP031348	89518	47.57	Escherichia coli O145 strain RM9467-C1 plasmid pRM9467-C1, complete sequence.
NZ_CP031346	89515	47.58	Escherichia coli O145 strain RM9873-C1 plasmid pRM9873-C1, complete sequence.
NZ_CP030765	93169	47.94	Escherichia coli strain 2017C-4109 plasmid p2017C-4109, complete sequence.
NZ_CP030766	59808	42.39	Escherichia coli strain 2017C-4109 plasmid pMCR-1, complete sequence.
NZ_CP040312	92909	47.81	Escherichia coli strain F3398 plasmid pO157, complete sequence.
NZ_CP041625	32726	39.94	Escherichia coli O157:H7 strain ATCC 43888 plasmid p35K_like, complete sequence.
NZ_CP041624	95081	47.82	Escherichia coli O157:H7 strain ATCC 43888 plasmid pO157_like, complete sequence.
NC_013365	204604	46.99	Escherichia coli O111:H- str. 11128 plasmid pO111_1, complete sequence.
NC_013370	97897	48.16	Escherichia coli O111:H- str. 11128 plasmid pO111_2, complete sequence.
NC_013366	77690	49.99	Escherichia coli O111:H- str. 11128 plasmid pO111_3, complete sequence.
NC_013367	8140	49.64	Escherichia coli O111:H- str. 11128 plasmid pO111_4, complete sequence.
NC_013368	6673	50.2	Escherichia coli O111:H- str. 11128 plasmid pO111_5, complete sequence.
NZ_CP018248	91353	47.67	Escherichia coli strain 7784 plasmid pO157, complete sequence.
NZ_CP027356	71714	48.13	Escherichia coli strain 2013C-4991 plasmid unnamed1.
NZ_CP027357	131463	49.89	Escherichia coli strain 2013C-4991 plasmid unnamed2.
NZ_CP027358	110001	46.24	Escherichia coli strain 2013C-4991 plasmid unnamed3, complete sequence.
NZ_CP027341	104198	49.78	Escherichia coli strain 2015C-3121 plasmid unnamed.
NZ_CP027308	63664	50.16	Escherichia coli strain 2015C-3108 plasmid unnamed1.
NZ_CP027309	93724	47.4	Escherichia coli strain 2015C-3108 plasmid unnamed2, complete sequence.
NZ_CP069523	67045	50.9	Escherichia coli strain FDAARGOS_1267 plasmid unnamed1, complete sequence.
NZ_CP069524	2781	51.53	Escherichia coli strain FDAARGOS_1267 plasmid unnamed2.
NZ_CP069525	1247	52.04	Escherichia coli strain FDAARGOS_1267 plasmid unnamed3.
NZ_CP038401	92513	47.82	Escherichia coli O157:H7 strain DEC4E plasmid pDEC4E-1, complete sequence.
NZ_CP038399	4634	42.38	Escherichia coli O157:H7 strain DEC4E plasmid pDEC4E-2, complete sequence.
NZ_CP038400	6675	50.31	Escherichia coli O157:H7 strain DEC4E plasmid pDEC4E-3, complete sequence.
NZ_CP029690	188342	46.29	Escherichia coli strain SD134209 plasmid pSD134209-1, complete sequence.
NZ_CP029691	78329	50.04	Escherichia coli strain SD134209 plasmid pSD134209-2, complete sequence.
NZ_AP018803	124261	53.2	Escherichia coli strain E2863 plasmid pE2863-1, complete sequence.
NZ_AP018804	92925	47.19	Escherichia coli strain E2863 plasmid pE2863-2, complete sequence.
NZ_AP018805	78434	50.03	Escherichia coli strain E2863 plasmid pE2863-3, complete sequence.
NZ_AP018806	60684	42.49	Escherichia coli strain E2863 plasmid pE2863-4, complete sequence.
NZ_AP018807	37917	39.97	Escherichia coli strain E2863 plasmid pE2863-5, complete sequence.
CP051850	7472	48.85	Escherichia coli strain SCU-101 plasmid pSCU-101-1, complete sequence.
CP051851	4980	45.36	Escherichia coli strain SCU-101 plasmid pSCU-101-2, complete sequence.
CP051852	1005	55.12	Escherichia coli strain SCU-101 plasmid pSCU-101-3, complete sequence.
NZ_CP010120	63684	49.53	Escherichia coli strain C3 plasmid A, complete sequence.
NZ_CP021336	86922	47.76	Escherichia coli strain 95JB1 plasmid p95JB1A, complete sequence.
NZ_CP021337	83138	50.32	Escherichia coli strain 95JB1 plasmid p95JB1B, complete sequence.
NZ_CP038506	92027	47.95	Escherichia coli strain 28Eco12 plasmid p28Eco12, complete sequence.
NZ_CP031342	89519	47.57	Escherichia coli O145 strain RM10425-C1 plasmid pRM10425-C1, complete sequence.
NZ_CP027598	74505	49.48	Escherichia coli strain 86-3153 plasmid unnamed.
NZ_CP027455	73262	51.69	Escherichia coli strain 2014C-4423 plasmid unnamed1, complete sequence.
NZ_CP027456	79682	46.21	Escherichia coli strain 2014C-4423 plasmid unnamed2, complete sequence.
NZ_CP045864	95989	47.77	Escherichia coli O157:H7 strain ATCC 43890 plasmid p1CFSAN076619, complete sequence.
NZ_CP045865	3306	43.41	Escherichia coli O157:H7 strain ATCC 43890 plasmid p2CFSAN076619, complete sequence.
NZ_CP024480	77062	48.84	Escherichia coli strain 2011C-4315 plasmid unnamed1, complete sequence.
NZ_CP024481	105489	49.61	Escherichia coli strain 2011C-4315 plasmid unnamed2, complete sequence.
NZ_CP038495	92707	47.6	Escherichia coli O157:H7 strain TT12B plasmid pO157, complete sequence.
NZ_CP010123	214445	47.76	Escherichia coli strain C5 plasmid A, complete sequence.
NZ_CP010124	86032	49.67	Escherichia coli strain C5 plasmid B, complete sequence.
NZ_CP012803	92739	47.6	Escherichia coli O157:H7 strain WS4202 isolate laboratory strain plasmid pO157-WS4202, complete sequence.
NZ_CP012804	3306	43.41	Escherichia coli O157:H7 strain WS4202 isolate laboratory strain plasmid pOSAK1-WS4202, complete sequence.
NZ_CP009051	97258	47.72	Escherichia coli NCCP15648 plasmid p15648-1, complete sequence.
NZ_CP009052	83860	52.93	Escherichia coli NCCP15648 plasmid p15648-2, complete sequence.
NZ_CP009053	78111	46.8	Escherichia coli NCCP15648 plasmid p15648-3, complete sequence.
NZ_CP051689	139635	49.81	Escherichia coli strain SCU-387 plasmid pSCU-387-1, complete sequence.
NZ_CP051690	39292	51.99	Escherichia coli strain SCU-387 plasmid pSCU-387-2, complete sequence.
NZ_CP051691	6216	44.72	Escherichia coli strain SCU-387 plasmid pSCU-387-3, complete sequence.
NZ_AP022816	114953	48.73	Escherichia coli strain JE86-ST05 plasmid JE86-ST05_p1, complete sequence.
NZ_AP022817	85841	53.13	Escherichia coli strain JE86-ST05 plasmid JE86-ST05_p2, complete sequence.
NZ_AP022818	48666	44.54	Escherichia coli strain JE86-ST05 plasmid JE86-ST05_p3, complete sequence.
NZ_AP022819	7939	41.63	Escherichia coli strain JE86-ST05 plasmid JE86-ST05_p4, complete sequence.
NZ_AP022820	5716	42.39	Escherichia coli strain JE86-ST05 plasmid JE86-ST05_p5, complete sequence.
NZ_CP060064	1549	51.07	Escherichia coli strain G6/7 plasmid pSYM10, complete sequence.
NZ_CP060063	7136	48.67	Escherichia coli strain G6/7 plasmid pSYM12, complete sequence.
NZ_CP060062	99817	47.88	Escherichia coli strain G6/7 plasmid unnamed1, complete sequence.
NZ_CP041358	130003	50.86	Escherichia coli strain U1 plasmid unnamed1, complete sequence.
NZ_CP027348	70613	49.87	Escherichia coli strain 2013C-4361 plasmid unnamed.
NC_017647	54289	49.21	Escherichia coli O7:K1 str. CE10 plasmid pCE10A, complete sequence.
NC_017648	5163	47.49	Escherichia coli O7:K1 str. CE10 plasmid pCE10B, complete sequence.
NC_017649	4197	42.36	Escherichia coli O7:K1 str. CE10 plasmid pCE10C, complete sequence.
NC_017650	1549	51.07	Escherichia coli O7:K1 str. CE10 plasmid pCE10D, complete sequence.
NZ_CP027222	48390	50.82	Escherichia coli strain 2015C-3101 plasmid unnamed1, complete sequence.
NZ_CP027223	72543	47.67	Escherichia coli strain 2015C-3101 plasmid unnamed2.
NZ_CP065606	66104	48.9	Escherichia coli strain FDAARGOS_946 plasmid unnamed1, complete sequence.
NZ_CP065608	4011	42.28	Escherichia coli strain FDAARGOS_946 plasmid unnamed2, complete sequence.
NZ_CP065609	6888	48.59	Escherichia coli strain FDAARGOS_946 plasmid unnamed3, complete sequence.
NC_018662	75573	47.17	Escherichia coli O104:H4 str. 2009EL-2071 plasmid pAA-09EL71, complete sequence.
NC_018663	1549	50.81	Escherichia coli O104:H4 str. 2009EL-2071 plasmid pG-09EL71, complete sequence.
NZ_CP023530	75554	47.16	Escherichia coli strain FDAARGOS_401 plasmid unnamed, complete sequence.
NZ_CP009860	121385	51.89	Escherichia coli strain ECONIH1 plasmid pECO-824, complete sequence.
NZ_CP009861	47560	44.56	Escherichia coli strain ECONIH1 plasmid pECO-b75, complete sequence.
NZ_CP009862	80186	53.96	Escherichia coli strain ECONIH1 plasmid pKPC-629, complete sequence.
NZ_CP051656	175089	47.62	Escherichia coli strain RM11911 plasmid pRM11911.
NZ_CP010241	62376	49.46	Escherichia coli strain C7 plasmid A, complete sequence.
NZ_CP053081	103328	50.03	Escherichia coli strain HB37 plasmid pHB37-1, complete sequence.
NZ_CP053082	71222	52.07	Escherichia coli strain HB37 plasmid pHB37-2, complete sequence.
NZ_CP053083	56716	42.45	Escherichia coli strain HB37 plasmid pHB37-3, complete sequence.
NZ_CP046540	72427	50.82	Escherichia coli strain FHI_NMBU_10 plasmid pFHI_NMBU_10_01, complete sequence.
NZ_CP046541	7047	48.26	Escherichia coli strain FHI_NMBU_10 plasmid pFHI_NMBU_10_02, complete sequence.
NZ_CP046542	6754	51.27	Escherichia coli strain FHI_NMBU_10 plasmid pFHI_NMBU_10_03, complete sequence.
NZ_CP046543	5631	47.38	Escherichia coli strain FHI_NMBU_10 plasmid pFHI_NMBU_10_04, complete sequence.
NZ_CP046544	3356	47.56	Escherichia coli strain FHI_NMBU_10 plasmid pFHI_NMBU_10_05, complete sequence.
NZ_CP046545	2571	44.38	Escherichia coli strain FHI_NMBU_10 plasmid pFHI_NMBU_10_06, complete sequence.
NZ_CP027549	94116	48.89	Escherichia coli strain 2014C-3061 plasmid unnamed, complete sequence.
NZ_CP038395	4011	42.28	Escherichia coli O157:H7 strain DEC5A plasmid pDEC5A-2, complete sequence.
NZ_CP038396	6888	48.59	Escherichia coli O157:H7 strain DEC5A plasmid pDEC5A-3, complete sequence.
NZ_CP038397	66091	48.91	Escherichia coli O157:H7 strain DEC5A plasmid pDEC5A-4, complete sequence.
NZ_CP041001	75555	47.16	Escherichia coli strain FDAARGOS_772 plasmid unnamed1, complete sequence.
NZ_CP041003	1549	50.81	Escherichia coli strain FDAARGOS_772 plasmid unnamed2, complete sequence.
NZ_CP041004	1245	28.27	Escherichia coli strain FDAARGOS_772 plasmid unnamed3.
NZ_CP024617	88896	47.89	Escherichia coli strain SMN152SH1 plasmid pO177A1, complete sequence.
NZ_CP024616	48983	42.49	Escherichia coli strain SMN152SH1 plasmid pO177B1, complete sequence.
NZ_CP024615	6675	50.23	Escherichia coli strain SMN152SH1 plasmid pO177C1, complete sequence.
NZ_LS992193	128948	51.63	Escherichia coli isolate Escherichia coli str. TO217 plasmid 2, complete sequence.
NZ_LS992194	86367	51.04	Escherichia coli isolate Escherichia coli str. TO217 plasmid 3, complete sequence.
NZ_AP019762	118827	53.28	Escherichia coli O111:H- strain 110512 plasmid pO111-110512_1, complete sequence.
NZ_AP019763	78470	50.04	Escherichia coli O111:H- strain 110512 plasmid pO111-110512_2, complete sequence.
NZ_AP019764	46350	40.7	Escherichia coli O111:H- strain 110512 plasmid pO111-110512_3, complete sequence.
NZ_AP019765	6795	50.79	Escherichia coli O111:H- strain 110512 plasmid pO111-110512_4, complete sequence.
NZ_AP019766	6674	50.33	Escherichia coli O111:H- strain 110512 plasmid pO111-110512_5, complete sequence.
NZ_AP019767	5423	47.19	Escherichia coli O111:H- strain 110512 plasmid pO111-110512_6, complete sequence.
NZ_AP019768	1546	51.75	Escherichia coli O111:H- strain 110512 plasmid pO111-110512_7, complete sequence.
NZ_CP030770	149680	52.42	Escherichia coli strain 2017C-4173W12 plasmid p2017C-4173W12, complete sequence.
NZ_CP030769	27128	42.54	Escherichia coli strain 2017C-4173W12 plasmid pMCR-1_2017C-4173W12.
NZ_CP042879	132874	50.93	Escherichia coli strain NMBU_W05E18 plasmid pNMBU-W05E18_01, complete sequence.
NZ_CP042880	49825	50.85	Escherichia coli strain NMBU_W05E18 plasmid pNMBU-W05E18_02, complete sequence.
NZ_CP042881	66300	50.23	Escherichia coli strain NMBU_W05E18 plasmid pNMBU-W05E18_03, complete sequence.
NZ_CP045713	114161	49.39	Escherichia coli strain FHI_NMBU_11 plasmid pFHI_NMBU_11_01, complete sequence.
NZ_CP045714	108688	49.02	Escherichia coli strain FHI_NMBU_11 plasmid pFHI_NMBU_11_02, complete sequence.
NZ_CP045715	34329	40.85	Escherichia coli strain FHI_NMBU_11 plasmid pFHI_NMBU_11_03, complete sequence.
NZ_CP045716	7769	48.58	Escherichia coli strain FHI_NMBU_11 plasmid pFHI_NMBU_11_04, complete sequence.
NZ_CP045717	3082	44.91	Escherichia coli strain FHI_NMBU_11 plasmid pFHI_NMBU_11_05, complete sequence.
NZ_CP060060	1549	51.07	Escherichia coli strain G8 plasmid pSYM10, complete sequence.
NZ_CP060059	7136	48.67	Escherichia coli strain G8 plasmid pSYM12, complete sequence.
NZ_CP060058	99817	47.88	Escherichia coli strain G8 plasmid unnamed1, complete sequence.
NZ_CP049078	70739	51.91	Escherichia coli strain p11A plasmid p11A_p1, complete sequence.
NZ_CP049079	180962	52.01	Escherichia coli strain p11A plasmid p11A_p2, complete sequence.
NZ_CP038390	5423	47.17	Escherichia coli O157:H7 strain DEC5B plasmid pDEC5B-2, complete sequence.
NZ_CP038391	9563	53.8	Escherichia coli O157:H7 strain DEC5B plasmid pDEC5B-3, complete sequence.
NZ_CP038392	75328	47.22	Escherichia coli O157:H7 strain DEC5B plasmid pDEC5B-4, complete sequence.
NZ_CP038393	99707	49.4	Escherichia coli O157:H7 strain DEC5B plasmid pDEC5B-5, complete sequence.
NZ_CP011338	14400	47.8	Escherichia coli O104:H4 str. C227-11 isolate 368 shch plasmid unnamed, complete sequence.
NZ_CP011333	16948	47.79	Escherichia coli O104:H4 str. C227-11 isolate 368 shch plasmid unnamed, complete sequence.
NZ_CP011335	7893	50.99	Escherichia coli O104:H4 str. C227-11 isolate 368 shch plasmid unnamed, complete sequence.
NZ_CP011337	17818	50.42	Escherichia coli O104:H4 str. C227-11 isolate 368 shch plasmid unnamed, complete sequence.
NZ_CP011332	75079	47.16	Escherichia coli O104:H4 str. C227-11 isolate 368 shch plasmid unnamed, complete sequence.
NZ_CP011334	2954	39.1	Escherichia coli O104:H4 str. C227-11 isolate 368 shch plasmid unnamed, complete sequence.
NZ_CP011336	18052	46.65	Escherichia coli O104:H4 str. C227-11 isolate 368 shch plasmid unnamed, complete sequence.
NZ_CP023143	228947	46.09	Escherichia coli strain CFSAN061770 plasmid pEGY1-MCR-1, complete sequence.
NZ_CP023144	103234	53.19	Escherichia coli strain CFSAN061770 plasmid pEGY2, complete sequence.
NZ_CP023145	87173	50.97	Escherichia coli strain CFSAN061770 plasmid pEGY3, complete sequence.
NZ_CP015086	130920	52.6	Escherichia coli O25b:H4 plasmid unnamed, complete sequence.
NZ_AP022070	117617	52.5	Escherichia coli strain WP4-W18-ESBL-09 plasmid pWP4-W18-ESBL-09_1, complete sequence.
NZ_AP022071	84553	52.93	Escherichia coli strain WP4-W18-ESBL-09 plasmid pWP4-W18-ESBL-09_2, complete sequence.
NZ_AP022072	77891	51.68	Escherichia coli strain WP4-W18-ESBL-09 plasmid pWP4-W18-ESBL-09_3, complete sequence.
NZ_AP022073	5219	48.8	Escherichia coli strain WP4-W18-ESBL-09 plasmid pWP4-W18-ESBL-09_4, complete sequence.
NZ_AP022074	5167	47.51	Escherichia coli strain WP4-W18-ESBL-09 plasmid pWP4-W18-ESBL-09_5, complete sequence.
NZ_AP022075	3272	45.81	Escherichia coli strain WP4-W18-ESBL-09 plasmid pWP4-W18-ESBL-09_6, complete sequence.
NZ_AP022076	2100	47.19	Escherichia coli strain WP4-W18-ESBL-09 plasmid pWP4-W18-ESBL-09_7, complete sequence.
NZ_CP012500	225292	46.29	Escherichia coli strain 09-00049 plasmid pCFSAN004180G, complete sequence.
NZ_CP064104	145347	51.54	Escherichia coli strain IR53017 plasmid unnamed1, complete sequence.
NZ_CP064105	47492	44.59	Escherichia coli strain IR53017 plasmid unnamed2, complete sequence.
NZ_CP064106	65415	50.81	Escherichia coli strain IR53017 plasmid unnamed3, complete sequence.
NZ_CP064107	86173	53.17	Escherichia coli strain IR53017 plasmid unnamed4, complete sequence.
NZ_CP017632	369298	47.4	Escherichia coli strain SLK172 plasmid pSLK172-1, complete sequence.
NZ_CP017633	120528	52.72	Escherichia coli strain SLK172 plasmid pSLK172-2, complete sequence.
NZ_AP022812	114901	48.73	Escherichia coli strain JE86-ST02 plasmid JE86-ST02_p1, complete sequence.
NZ_AP022813	83276	53.13	Escherichia coli strain JE86-ST02 plasmid JE86-ST02_p2, complete sequence.
NZ_AP022814	48397	44.56	Escherichia coli strain JE86-ST02 plasmid JE86-ST02_p3, complete sequence.
NZ_LR898875	107967	50.92	Escherichia coli isolate MSB1_4I-sc-2280412 plasmid 2, complete sequence.
NZ_LR898876	82205	50.49	Escherichia coli isolate MSB1_4I-sc-2280412 plasmid 3, complete sequence.
NZ_LR898877	7450	48.39	Escherichia coli isolate MSB1_4I-sc-2280412 plasmid 4, complete sequence.
NZ_LR898878	6640	44.02	Escherichia coli isolate MSB1_4I-sc-2280412 plasmid 5, complete sequence.
NZ_LR898879	5631	47.42	Escherichia coli isolate MSB1_4I-sc-2280412 plasmid 6, complete sequence.
NZ_LR898880	5210	48.56	Escherichia coli isolate MSB1_4I-sc-2280412 plasmid 7, complete sequence.
NZ_LR898881	5180	47.22	Escherichia coli isolate MSB1_4I-sc-2280412 plasmid 8, complete sequence.
NZ_LR898882	4082	49.41	Escherichia coli isolate MSB1_4I-sc-2280412 plasmid 9, complete sequence.
NZ_LR898883	4072	43.86	Escherichia coli isolate MSB1_4I-sc-2280412 plasmid 10, complete sequence.
NZ_LR898884	2073	48	Escherichia coli isolate MSB1_4I-sc-2280412 plasmid 11, complete sequence.
NZ_LR898885	1902	44.11	Escherichia coli isolate MSB1_4I-sc-2280412 plasmid 12, complete sequence.
NZ_CP026400	60248	45.36	Escherichia coli strain ECONIH4 plasmid pECO-5e72, complete sequence.
NZ_CP026404	127217	52.89	Escherichia coli strain ECONIH4 plasmid pECO-6357, complete sequence.
NZ_CP026403	103161	50.15	Escherichia coli strain ECONIH4 plasmid pECO-816c, complete sequence.
NZ_CP026405	186884	52.01	Escherichia coli strain ECONIH4 plasmid pECO-c85f, complete sequence.
NZ_CP026402	13542	53.23	Escherichia coli strain ECONIH4 plasmid pECO-e618, complete sequence.
NZ_CP026401	20245	54.51	Escherichia coli strain ECONIH4 plasmid pKPC-b33e, complete sequence.
NC_022742	88546	49.73	Escherichia coli plasmid pHUSEC2011-1, complete sequence.
NC_022743	75569	47.16	Escherichia coli plasmid pHUSEC2011-2, complete sequence.
NC_022741	1549	50.81	Escherichia coli plasmid pHUSEC2011-3, complete sequence.
NZ_CP023534	108679	49.09	Escherichia coli strain FDAARGOS_403 plasmid unnamed1, complete sequence.
NZ_CP023533	75566	47.16	Escherichia coli strain FDAARGOS_403 plasmid unnamed2, complete sequence.
NZ_CP023532	13833	48.92	Escherichia coli strain FDAARGOS_403 plasmid unnamed3, complete sequence.
NZ_CP027395	117229	49.91	Escherichia coli O104:H4 strain FDAARGOS_349 plasmid unnamed1.
NZ_CP027392	75562	47.16	Escherichia coli O104:H4 strain FDAARGOS_349 plasmid unnamed2, complete sequence.
NZ_CP027396	18636	47.33	Escherichia coli O104:H4 strain FDAARGOS_349 plasmid unnamed3.
NZ_CP027393	12402	51.4	Escherichia coli O104:H4 strain FDAARGOS_349 plasmid unnamed4.
NZ_CP031903	88545	49.73	Escherichia coli O104:H4 strain FWSEC0009 plasmid unnamed18, complete sequence.
NZ_CP031904	75669	47.23	Escherichia coli O104:H4 strain FWSEC0009 plasmid unnamed19, complete sequence.
NZ_CP031905	1549	50.81	Escherichia coli O104:H4 strain FWSEC0009 plasmid unnamed20, complete sequence.
NC_018666	74217	47.09	Escherichia coli O104:H4 str. 2011C-3493 plasmid pAA-EA11, complete sequence.
NC_018659	88544	49.73	Escherichia coli O104:H4 str. 2011C-3493 plasmid pESBL-EA11, complete sequence.
NC_018660	1549	50.81	Escherichia coli O104:H4 str. 2011C-3493 plasmid pG-EA11, complete sequence.
NZ_CP065616	155369	47.74	Escherichia coli strain FDAARGOS_943 plasmid unnamed1, complete sequence.
NZ_CP065617	5815	46.67	Escherichia coli strain FDAARGOS_943 plasmid unnamed2, complete sequence.
NZ_CP042296	167256	45.92	Escherichia coli strain RM9088 plasmid p1RM9088, complete sequence.
NZ_CP042297	86529	49.24	Escherichia coli strain RM9088 plasmid p2RM9088, complete sequence.
NZ_CP024055	88839	47.86	Escherichia coli strain SMN197SH3 plasmid pO177A3, complete sequence.
NZ_CP024054	48982	42.49	Escherichia coli strain SMN197SH3 plasmid pO177B3, complete sequence.
NZ_CP024053	6675	50.23	Escherichia coli strain SMN197SH3 plasmid pO177C3, complete sequence.
NZ_CP051654	45063	48.79	Escherichia coli strain RM13745 plasmid pRM13745-1.
NZ_CP051655	70650	48.67	Escherichia coli strain RM13745 plasmid pRM13745-2.
NZ_CP051653	99009	47.2	Escherichia coli strain RM13752 plasmid pRM13752.
NC_017653	94015	48.07	Escherichia coli O55:H7 str. RM12579 plasmid p12579_1, complete sequence.
NC_017657	66078	48.91	Escherichia coli O55:H7 str. RM12579 plasmid p12579_2, complete sequence.
NC_017654	12068	48.93	Escherichia coli O55:H7 str. RM12579 plasmid p12579_3, complete sequence.
NC_017658	6211	52.52	Escherichia coli O55:H7 str. RM12579 plasmid p12579_4, complete sequence.
NC_017655	5954	45.8	Escherichia coli O55:H7 str. RM12579 plasmid p12579_5, complete sequence.
NZ_CP019028	147346	51.09	Escherichia coli strain Ecol_881 plasmid pEC881_1, complete sequence.
NZ_CP019027	109344	46.08	Escherichia coli strain Ecol_881 plasmid pEC881_2, complete sequence.
NZ_CP019025	6647	48.5	Escherichia coli strain Ecol_881 plasmid pEC881_4, complete sequence.
NZ_CP019024	4063	51.49	Escherichia coli strain Ecol_881 plasmid pEC881_5, complete sequence.
NZ_CP019023	3256	47.27	Escherichia coli strain Ecol_881 plasmid pEC881_6, complete sequence.
NZ_CP019022	3087	48.56	Escherichia coli strain Ecol_881 plasmid pEC881_7, complete sequence.
NZ_CP019021	1459	50.93	Escherichia coli strain Ecol_881 plasmid pEC881_8, complete sequence.
NZ_CP019026	59373	52.11	Escherichia coli strain Ecol_881 plasmid pEC881_KPC, complete sequence.
NZ_CP029580	178078	52.2	Escherichia coli strain DA33137 plasmid pDA33137-178, complete sequence.
NZ_CP029581	2101	47.17	Escherichia coli strain DA33137 plasmid pDA33137-2, complete sequence.
NZ_CP018969	82364	50.69	Escherichia coli strain Ecol_542 plasmid pEC542_1, complete sequence.
NZ_CP018967	5167	47.51	Escherichia coli strain Ecol_542 plasmid pEC542_3, complete sequence.
NZ_CP018966	4087	49.89	Escherichia coli strain Ecol_542 plasmid pEC542_4, complete sequence.
NZ_CP018968	44320	56.61	Escherichia coli strain Ecol_542 plasmid pEC542_KPC, complete sequence.
NZ_CP022085	109945	45.31	Escherichia coli O104:H4 strain FDAARGOS_348 plasmid unnamed1, complete sequence.
NZ_CP022087	75559	47.16	Escherichia coli O104:H4 strain FDAARGOS_348 plasmid unnamed2, complete sequence.
NZ_AP022526	123467	52.23	Escherichia coli strain THO-003 plasmid pTHO-003-1, complete sequence.
NZ_CP027460	74247	48.25	Escherichia coli strain 90-3040 plasmid unnamed, complete sequence.
NC_018651	109274	45.31	Escherichia coli O104:H4 str. 2009EL-2050 plasmid p09EL50, complete sequence.
NC_018654	74213	47.08	Escherichia coli O104:H4 str. 2009EL-2050 plasmid pAA-09EL50, complete sequence.
NC_018652	1549	50.81	Escherichia coli O104:H4 str. 2009EL-2050 plasmid pG-09EL50, complete sequence.
NZ_LR890537	158162	52.7	Escherichia coli isolate MSB1_8B-sc-2280300 plasmid 2, complete sequence.
NZ_LR890538	97184	47.97	Escherichia coli isolate MSB1_8B-sc-2280300 plasmid 3, complete sequence.
NZ_LR890539	5164	47.52	Escherichia coli isolate MSB1_8B-sc-2280300 plasmid 4, complete sequence.
NZ_LR890540	2102	47.19	Escherichia coli isolate MSB1_8B-sc-2280300 plasmid 5, complete sequence.
NZ_LR890541	1459	50.93	Escherichia coli isolate MSB1_8B-sc-2280300 plasmid 6, complete sequence.
NZ_CP067308	226468	45.97	Escherichia coli strain ABW_A19 plasmid pABW_A19a, complete sequence.
NZ_CP067309	68410	49.51	Escherichia coli strain ABW_A19 plasmid pABW_A19b, complete sequence.
NZ_CP067310	53474	45.96	Escherichia coli strain ABW_A19 plasmid pABW_A19c, complete sequence.
NZ_CP035754	33827	41.6	Escherichia coli E110019 plasmid pE110019_33, complete sequence.
NZ_CP035756	5681	46.22	Escherichia coli E110019 plasmid pE110019_5, complete sequence.
NZ_CP035753	65378	47.79	Escherichia coli E110019 plasmid pE110019_65, complete sequence.
NZ_CP035752	66171	52.44	Escherichia coli E110019 plasmid pE110019_66, complete sequence.
NZ_CP047610	51704	50.76	Escherichia coli strain NMBU_ W06E18 plasmid pNMBU_W06E18_Str1_1, complete sequence.
NZ_CP047611	39455	40.68	Escherichia coli strain NMBU_ W06E18 plasmid pNMBU_W06E18_Str1_2, complete sequence.
NZ_CP047612	32448	40.77	Escherichia coli strain NMBU_ W06E18 plasmid pNMBU_W06E18_Str1_3, complete sequence.
NZ_CP047613	64483	52.09	Escherichia coli strain NMBU_ W06E18 plasmid pNMBU_W06E18_Str1_4, complete sequence.
NZ_CP041432	80029	50.08	Escherichia coli strain STEC316 plasmid pSTEC316, complete sequence.
NZ_CP023552	77422	46.75	Escherichia coli strain FORC_043 plasmid pFORC43, complete sequence.
NZ_CP053285	1549	51	Escherichia coli strain SCU-104 plasmid pSCU-104-1.
NZ_CP023850	138672	53.03	Escherichia coli strain 4/0 plasmid p4_0.1, complete sequence.
NZ_CP023851	110452	46.47	Escherichia coli strain 4/0 plasmid p4_0.2, complete sequence.
NZ_CP023852	10612	54.66	Escherichia coli strain 4/0 plasmid p4_0.3, complete sequence.
NC_017627	113346	49.55	Escherichia coli 042 plasmid pAA, complete sequence.
NZ_CP028430	117123	46.57	Escherichia coli strain RM9131 plasmid pRM9131-1, complete sequence.
NZ_CP028431	76698	50.19	Escherichia coli strain RM9131 plasmid pRM9131-2, complete sequence.
NZ_CP027588	58109	49.82	Escherichia coli strain 2013C-4974 plasmid unnamed.
NZ_AP022004	131334	50.89	Escherichia coli strain WP3-W18-ESBL-08 plasmid pWP3-W18-ESBL-08_1, complete sequence.
NZ_CP040454	117139	49.05	Escherichia coli strain UPEC132 plasmid unnamed1, complete sequence.
NZ_CP040455	101356	54.04	Escherichia coli strain UPEC132 plasmid unnamed2, complete sequence.
NZ_CP028433	120253	46.53	Escherichia coli strain RM9975 plasmid pRM9975-1, complete sequence.
NZ_CP028434	78526	50.25	Escherichia coli strain RM9975 plasmid pRM9975-2, complete sequence.
NZ_CP012499	223952	46.26	Escherichia coli strain GB089 plasmid pCFSAN004181P, complete sequence.
NZ_AP022288	127169	47.1	Escherichia coli strain WP9-S17-ESBL-11 plasmid pWP9-S17-ESBL-11_1, complete sequence.
NZ_AP022289	82448	50	Escherichia coli strain WP9-S17-ESBL-11 plasmid pWP9-S17-ESBL-11_2, complete sequence.
NZ_CP033847	143865	50.76	Escherichia coli strain FDAARGOS_497 plasmid unnamed1, complete sequence.
NZ_CP033848	97018	48.01	Escherichia coli strain FDAARGOS_497 plasmid unnamed2, complete sequence.
NZ_CP033849	32101	41.35	Escherichia coli strain FDAARGOS_497 plasmid unnamed3, complete sequence.
NZ_CP033851	4082	49.41	Escherichia coli strain FDAARGOS_497 plasmid unnamed4, complete sequence.
NZ_CP033852	1459	50.93	Escherichia coli strain FDAARGOS_497 plasmid unnamed5, complete sequence.
NZ_CP033853	3257	47.25	Escherichia coli strain FDAARGOS_497 plasmid unnamed6, complete sequence.
NZ_LR890715	70350	52.25	Escherichia coli isolate MSB1_6C-sc-2280315 plasmid 2, complete sequence.
NZ_LR890716	36268	61.78	Escherichia coli isolate MSB1_6C-sc-2280315 plasmid 3, complete sequence.
NZ_LR890717	6912	56.47	Escherichia coli isolate MSB1_6C-sc-2280315 plasmid 4, complete sequence.
NZ_LR890718	5165	47.47	Escherichia coli isolate MSB1_6C-sc-2280315 plasmid 5, complete sequence.
NZ_CP018978	117844	52.76	Escherichia coli strain Ecol_656 plasmid pEC656_1, complete sequence.
NZ_CP018977	58431	53.35	Escherichia coli strain Ecol_656 plasmid pEC656_KPC, complete sequence.
NZ_CP066033	97453	47.59	Escherichia coli strain FDAARGOS_1059 plasmid unnamed1, complete sequence.
NZ_CP066034	88626	49.86	Escherichia coli strain FDAARGOS_1059 plasmid unnamed2, complete sequence.
NZ_CP066035	2565	47.33	Escherichia coli strain FDAARGOS_1059 plasmid unnamed3, complete sequence.
NZ_CP066036	2664	45.27	Escherichia coli strain FDAARGOS_1059 plasmid unnamed4.
NZ_CP069529	50009	50.65	Escherichia coli strain FDAARGOS_1252 plasmid unnamed1, complete sequence.
NZ_CP069530	96693	49.74	Escherichia coli strain FDAARGOS_1252 plasmid unnamed2.
NZ_CP069531	68185	50.94	Escherichia coli strain FDAARGOS_1252 plasmid unnamed3.
NZ_CP025402	241162	46.29	Escherichia coli strain MS8345 plasmid pMS8345A, complete sequence.
NZ_CP025403	133281	49.64	Escherichia coli strain MS8345 plasmid pMS8345B, complete sequence.
NZ_CP038296	5423	47.08	Escherichia coli O157:H7 strain TB182A plasmid pTB182A-2, complete sequence.
NZ_CP038297	6211	52.52	Escherichia coli O157:H7 strain TB182A plasmid pTB182A-3, complete sequence.
NZ_CP038298	66022	48.94	Escherichia coli O157:H7 strain TB182A plasmid pTB182A-4, complete sequence.
NZ_CP038299	70894	52.8	Escherichia coli O157:H7 strain TB182A plasmid pTB182A-5, complete sequence.
NZ_CP069481	92886	49.86	Escherichia coli strain FDAARGOS_1257 plasmid unnamed, complete sequence.
NZ_CP038792	129920	48.81	Escherichia coli strain PF9285 plasmid pDW54_1, complete sequence.
NZ_CP038793	87604	52.54	Escherichia coli strain PF9285 plasmid pDW54_2, complete sequence.
NZ_CP038794	4715	41.12	Escherichia coli strain PF9285 plasmid pDW54_3, complete sequence.
NZ_CP038795	4091	49.57	Escherichia coli strain PF9285 plasmid pDW54_4, complete sequence.
NZ_CP031216	98533	52.53	Escherichia coli strain Es_ST80_L1_NDM_10_2017 plasmid pEsST80_L1_NDM, complete sequence.
NZ_CP012501	242187	47.03	Escherichia coli strain 08-00022 plasmid pCFSAN004179G, complete sequence.
NZ_CP069584	206267	52.33	Escherichia coli strain FDAARGOS_1265 plasmid unnamed1, complete sequence.
NZ_CP069585	5251	49.21	Escherichia coli strain FDAARGOS_1265 plasmid unnamed2, complete sequence.
NZ_CP029742	139740	51.5	Escherichia coli strain AR_0085 plasmid unnamed1, complete sequence.
NZ_CP029743	104555	51.47	Escherichia coli strain AR_0085 plasmid unnamed2, complete sequence.
NZ_CP029744	117192	49.35	Escherichia coli strain AR_0085 plasmid unnamed3, complete sequence.
NZ_CP027130	170292	51.65	Escherichia coli strain AR_0372 plasmid unnamed1, complete sequence.
NZ_CP027132	2101	47.17	Escherichia coli strain AR_0372 plasmid unnamed2, complete sequence.
NZ_CP027131	1552	51.74	Escherichia coli strain AR_0372 plasmid unnamed3, complete sequence.
NZ_CP027133	97167	47.56	Escherichia coli strain AR_0372 plasmid unnamed4.
NZ_CP027129	5193	46.54	Escherichia coli strain AR_0372 plasmid unnamed5.
NZ_CP040920	97266	47.2	Escherichia coli strain FC853_EC plasmid p853EC1, complete sequence.
NZ_CP040921	49465	44.79	Escherichia coli strain FC853_EC plasmid p853EC2, complete sequence.
NZ_CP040922	143714	52.45	Escherichia coli strain FC853_EC plasmid p853EC3, complete sequence.
NZ_CP040923	45224	50.2	Escherichia coli strain FC853_EC plasmid p853EC4, complete sequence.
NZ_CP033882	96948	47.57	Escherichia coli strain 50579417 plasmid p50579417_1, complete sequence.
NZ_CP033883	88005	52.73	Escherichia coli strain 50579417 plasmid p50579417_2, complete sequence.
NZ_CP033880	65499	51.43	Escherichia coli strain 50579417 plasmid p50579417_3_OXA-48, complete sequence.
NZ_CP033881	61890	52.1	Escherichia coli strain 50579417 plasmid p50579417_4, complete sequence.
NZ_CP033879	31882	41.49	Escherichia coli strain 50579417 plasmid p50579417_5, complete sequence.
NZ_CP031350	187274	49.4	Escherichia coli O145 strain RM9154-C1 plasmid p1RM9154-C1, complete sequence.
NZ_CP031351	96355	47.86	Escherichia coli O145 strain RM9154-C1 plasmid p2RM9154-C1, complete sequence.
NZ_CP031352	86711	47.72	Escherichia coli O145 strain RM9154-C1 plasmid p3RM9154-C1, complete sequence.
NZ_CP032517	4724	47.44	Escherichia coli strain 118UI plasmid pEco118UIa, complete sequence.
NZ_CP032516	90328	51.31	Escherichia coli strain 118UI plasmid pEco118UIb, complete sequence.
NZ_AP022208	214586	51.57	Escherichia coli strain WP7-S18-ESBL-09 plasmid pWP7-S18-ESBL-09_1, complete sequence.
NZ_AP022209	5163	47.49	Escherichia coli strain WP7-S18-ESBL-09 plasmid pWP7-S18-ESBL-09_2, complete sequence.
NZ_AP022210	4073	51.36	Escherichia coli strain WP7-S18-ESBL-09 plasmid pWP7-S18-ESBL-09_3, complete sequence.
NZ_AP022211	4073	44.05	Escherichia coli strain WP7-S18-ESBL-09 plasmid pWP7-S18-ESBL-09_4, complete sequence.
NZ_AP022212	2089	47.2	Escherichia coli strain WP7-S18-ESBL-09 plasmid pWP7-S18-ESBL-09_5, complete sequence.
NZ_CP013028	74656	48.43	Escherichia coli strain 2012C-4227 plasmid unnamed1, complete sequence.
NZ_CP013030	97704	47.74	Escherichia coli strain 2012C-4227 plasmid unnamed2, complete sequence.
NZ_CP019244	71430	52.54	Escherichia coli strain Combat2C1 plasmid pCombat2C1-1, complete sequence.
NZ_CP069446	36124	41.09	Escherichia coli strain FDAARGOS_1251 plasmid unnamed, complete sequence.
NZ_LR890327	98336	52.85	Escherichia coli isolate MINF_1A-sc-2280431 plasmid 2, complete sequence.
NZ_LR890328	70656	50.91	Escherichia coli isolate MINF_1A-sc-2280431 plasmid 3, complete sequence.
NZ_LR890329	47582	50.16	Escherichia coli isolate MINF_1A-sc-2280431 plasmid 4, complete sequence.
NZ_LR890330	6760	46.26	Escherichia coli isolate MINF_1A-sc-2280431 plasmid 5, complete sequence.
NZ_LR890331	5167	47.57	Escherichia coli isolate MINF_1A-sc-2280431 plasmid 6, complete sequence.
NZ_LR890332	3608	43.15	Escherichia coli isolate MINF_1A-sc-2280431 plasmid 7, complete sequence.
NZ_LR890333	1552	51.74	Escherichia coli isolate MINF_1A-sc-2280431 plasmid 8, complete sequence.
NZ_CP054364	126498	49.17	Escherichia coli strain SCU-171 plasmid pSCU-171-1, complete sequence.
NZ_CP054365	31162	41.75	Escherichia coli strain SCU-171 plasmid pSCU-171-2, complete sequence.
NZ_CP054366	8859	48.5	Escherichia coli strain SCU-171 plasmid pSCU-171-3, complete sequence.
NZ_CP054367	3090	38.41	Escherichia coli strain SCU-171 plasmid pSCU-171-4, complete sequence.
NZ_CP024135	63978	42.58	Escherichia coli strain 14EC017 plasmid p14EC017a, complete sequence.
NZ_CP024136	93781	52.34	Escherichia coli strain 14EC017 plasmid p14EC017b, complete sequence.
NZ_CP024137	107279	48.4	Escherichia coli strain 14EC017 plasmid p14EC017c, complete sequence.
NZ_CP028118	78469	50.04	Escherichia coli O111 str. RM9322 plasmid pRM9322-1, complete sequence.
NZ_CP028119	7072	50.61	Escherichia coli O111 str. RM9322 plasmid pRM9322-2, complete sequence.
NZ_CP025708	184098	51.42	Escherichia coli strain YDC107 plasmid pYDC107_184, complete sequence.
NZ_CP025711	41544	45.34	Escherichia coli strain YDC107 plasmid pYDC107_41, complete sequence.
NZ_CP025710	70372	53.34	Escherichia coli strain YDC107 plasmid pYDC107_70, complete sequence.
NZ_CP024721	111776	53.42	Escherichia coli isolate NQ3 plasmid p1NQ3, complete sequence.
NZ_CP024722	5167	47.53	Escherichia coli isolate NQ3 plasmid p2NQ3, complete sequence.
NZ_CP024718	105940	53.16	Escherichia coli strain LS4 plasmid p1LS4, complete sequence.
NZ_CP024719	5162	47.56	Escherichia coli strain LS4 plasmid p2LS4, complete sequence.
NZ_CP027446	74269	48.26	Escherichia coli strain 2013C-3492 plasmid unnamed, complete sequence.
NZ_CP027364	74659	48.42	Escherichia coli strain 88-3001 plasmid unnamed, complete sequence.
NZ_CP038387	6069	53.65	Escherichia coli O157:H7 strain DEC5D plasmid pDEC5D-2, complete sequence.
NZ_CP038388	57827	48.71	Escherichia coli O157:H7 strain DEC5D plasmid pDEC5D-3, complete sequence.
NZ_CP065610	97745	52.08	Escherichia coli strain FDAARGOS_945 plasmid unnamed1, complete sequence.
NZ_CP065612	277227	46.45	Escherichia coli strain FDAARGOS_945 plasmid unnamed2, complete sequence.
NZ_CP012493	52297	46.61	Escherichia coli strain CFSAN004176 plasmid pCFSAN004176G_02, complete sequence.
NZ_CP012492	34714	49.31	Escherichia coli strain CFSAN004176 plasmid pCFSAN004176P_01, complete sequence.
NZ_CP012491	95721	47.96	Escherichia coli strain CFSAN004176 plasmid pCFSAN004176P_03, complete sequence.
NZ_CP040264	97726	51.39	Escherichia coli strain 631 plasmid pEc631_1, complete sequence.
NZ_CP040265	73952	50.42	Escherichia coli strain 631 plasmid pEc631_2, complete sequence.
NZ_CP040266	30240	41.47	Escherichia coli strain 631 plasmid pEc631_3, complete sequence.
NZ_CP040267	7464	48.63	Escherichia coli strain 631 plasmid pEc631_4, complete sequence.
NZ_CP040268	5165	47.47	Escherichia coli strain 631 plasmid pEc631_5, complete sequence.
NZ_CP013186	77339	46.74	Escherichia coli strain FORC_029 plasmid FORC_029p, complete sequence.
NZ_CP023062	77306	46.74	Escherichia coli strain FORC_069 plasmid pFORC69, complete sequence.
NZ_AP022162	147186	51.71	Escherichia coli strain WP5-S18-ESBL-08 plasmid pWP5-S18-ESBL-08_1, complete sequence.
NZ_AP022163	97833	47.47	Escherichia coli strain WP5-S18-ESBL-08 plasmid pWP5-S18-ESBL-08_2, complete sequence.
NZ_AP022164	47454	44.51	Escherichia coli strain WP5-S18-ESBL-08 plasmid pWP5-S18-ESBL-08_3, complete sequence.
NZ_AP022165	6647	48.62	Escherichia coli strain WP5-S18-ESBL-08 plasmid pWP5-S18-ESBL-08_4, complete sequence.
NZ_AP022166	5277	48.95	Escherichia coli strain WP5-S18-ESBL-08 plasmid pWP5-S18-ESBL-08_5, complete sequence.
NZ_AP022167	5167	47.53	Escherichia coli strain WP5-S18-ESBL-08 plasmid pWP5-S18-ESBL-08_6, complete sequence.
NZ_AP022168	4082	49.41	Escherichia coli strain WP5-S18-ESBL-08 plasmid pWP5-S18-ESBL-08_7, complete sequence.
NZ_AP022169	4062	51.4	Escherichia coli strain WP5-S18-ESBL-08 plasmid pWP5-S18-ESBL-08_8, complete sequence.
NZ_AP022170	2088	47.17	Escherichia coli strain WP5-S18-ESBL-08 plasmid pWP5-S18-ESBL-08_9, complete sequence.
NZ_CP036244	146792	50.77	Escherichia coli strain S65EC plasmid pS65EC, complete sequence.
NZ_CP053235	159399	49.45	Escherichia coli strain SCU-106 plasmid pSCU-106-1, complete sequence.
NZ_CP053244	3131	38.68	Escherichia coli strain SCU-106 plasmid pSCU-106-10, complete sequence.
NZ_CP053236	111501	52.31	Escherichia coli strain SCU-106 plasmid pSCU-106-2, complete sequence.
NZ_CP053237	11467	46.52	Escherichia coli strain SCU-106 plasmid pSCU-106-3, complete sequence.
NZ_CP053238	8138	49.59	Escherichia coli strain SCU-106 plasmid pSCU-106-4, complete sequence.
NZ_CP053239	7618	62.88	Escherichia coli strain SCU-106 plasmid pSCU-106-5, complete sequence.
NZ_CP053240	5689	42.01	Escherichia coli strain SCU-106 plasmid pSCU-106-6, complete sequence.
NZ_CP053241	5237	45.45	Escherichia coli strain SCU-106 plasmid pSCU-106-7, complete sequence.
NZ_CP053242	4067	50.14	Escherichia coli strain SCU-106 plasmid pSCU-106-8, complete sequence.
NZ_CP053243	3863	47.4	Escherichia coli strain SCU-106 plasmid pSCU-106-9, complete sequence.
NC_017645	160573	52.59	Escherichia coli UMNK88 plasmid pUMNK88, complete sequence.
NC_017642	90868	50.34	Escherichia coli UMNK88 plasmid pUMNK88_91, complete sequence.
NC_017640	81475	50.37	Escherichia coli UMNK88 plasmid pUMNK88_Ent, complete sequence.
NC_017643	65549	51.89	Escherichia coli UMNK88 plasmid pUMNK88_Hly, complete sequence.
NC_017639	81883	49.47	Escherichia coli UMNK88 plasmid pUMNK88_K88, complete sequence.
NZ_CP031547	243642	45.72	Escherichia coli strain cq9 plasmid unnamed1, complete sequence.
NZ_CP031548	221041	49.91	Escherichia coli strain cq9 plasmid unnamed2, complete sequence.
NZ_CP031549	189020	52.18	Escherichia coli strain cq9 plasmid unnamed3, complete sequence.
NZ_CP031550	66945	42.54	Escherichia coli strain cq9 plasmid unnamed4, complete sequence.
NZ_LR890406	97983	51.62	Escherichia coli isolate MSB1_7C-sc-2280317 plasmid 2, complete sequence.
NZ_LR890407	5166	47.44	Escherichia coli isolate MSB1_7C-sc-2280317 plasmid 3, complete sequence.
NZ_LR890408	4082	49.44	Escherichia coli isolate MSB1_7C-sc-2280317 plasmid 4, complete sequence.
NZ_LR890409	1552	51.87	Escherichia coli isolate MSB1_7C-sc-2280317 plasmid 5, complete sequence.
NZ_CP068036	45814	40.05	Escherichia coli strain U90 plasmid pU90-1, complete sequence.
NZ_CP068037	18701	50.6	Escherichia coli strain U90 plasmid pU90-2, complete sequence.
NZ_CP068038	5597	46.47	Escherichia coli strain U90 plasmid pU90-3, complete sequence.
NZ_CP068039	75160	49.8	Escherichia coli strain U90 plasmid pU90-4, complete sequence.
NZ_CP068040	126454	49.06	Escherichia coli strain U90 plasmid pU90-5, complete sequence.
NZ_CP016498	151033	51.55	Escherichia coli strain UPEC 26-1 plasmid unnamed1, complete sequence.
NZ_CP021203	183508	49.96	Escherichia coli strain Z1002 plasmid p1002-1, complete sequence.
NZ_CP021204	92438	50.3	Escherichia coli strain Z1002 plasmid p1002-4, complete sequence.
NZ_CP021205	63392	43.01	Escherichia coli strain Z1002 plasmid p1002-MCR1, complete sequence.
NZ_CP021206	111688	52.33	Escherichia coli strain Z1002 plasmid p1002-NDM1, complete sequence.
NZ_CP015835	137565	51.95	Escherichia coli strain MS6198 plasmid pMS6198A, complete sequence.
NZ_CP015836	136327	50.08	Escherichia coli strain MS6198 plasmid pMS6198B, complete sequence.
NZ_CP015837	98242	47.6	Escherichia coli strain MS6198 plasmid pMS6198C, complete sequence.
NZ_CP015838	50899	50.06	Escherichia coli strain MS6198 plasmid pMS6198D, complete sequence.
NZ_CP023854	135053	51.38	Escherichia coli strain 2/0 plasmid p2_0.1, complete sequence.
NZ_CP023855	4063	51.49	Escherichia coli strain 2/0 plasmid p2_0.2, complete sequence.
NZ_CP023856	2331	55.77	Escherichia coli strain 2/0 plasmid p2_0.3, complete sequence.
NZ_CP023857	2101	47.07	Escherichia coli strain 2/0 plasmid p2_0.4, complete sequence.
NZ_CP023858	1552	51.87	Escherichia coli strain 2/0 plasmid p2_0.5, complete sequence.
NZ_LR890300	160467	51.99	Escherichia coli isolate MSB1_3B-sc-2280406 plasmid 2, complete sequence.
NZ_LR890301	70656	50.91	Escherichia coli isolate MSB1_3B-sc-2280406 plasmid 3, complete sequence.
NZ_LR890302	65499	51.43	Escherichia coli isolate MSB1_3B-sc-2280406 plasmid 4, complete sequence.
NZ_LR890303	30638	40.93	Escherichia coli isolate MSB1_3B-sc-2280406 plasmid 5, complete sequence.
NZ_LR890304	5166	47.56	Escherichia coli isolate MSB1_3B-sc-2280406 plasmid 6, complete sequence.
NZ_LR890305	4074	49.95	Escherichia coli isolate MSB1_3B-sc-2280406 plasmid 7, complete sequence.
NZ_LR890306	1552	51.87	Escherichia coli isolate MSB1_3B-sc-2280406 plasmid 8, complete sequence.
NZ_LR890467	160530	51.99	Escherichia coli isolate MSB1_7A-sc-2280394 plasmid 2, complete sequence.
NZ_LR890468	5166	47.56	Escherichia coli isolate MSB1_7A-sc-2280394 plasmid 3, complete sequence.
NZ_LR890469	4074	49.95	Escherichia coli isolate MSB1_7A-sc-2280394 plasmid 4, complete sequence.
NZ_LR890470	1552	51.87	Escherichia coli isolate MSB1_7A-sc-2280394 plasmid 5, complete sequence.
NZ_CP065968	15708	50.26	Escherichia coli strain FDAARGOS_1058 plasmid unnamed1.
NZ_CP065969	83533	49.57	Escherichia coli strain FDAARGOS_1058 plasmid unnamed2, complete sequence.
NZ_CP065971	128137	49.23	Escherichia coli strain FDAARGOS_1058 plasmid unnamed3, complete sequence.
NZ_AP022174	94776	52.41	Escherichia coli strain WP7-S17-ESBL-01 plasmid pWP7-S17-ESBL-01_1, complete sequence.
NZ_AP022175	63140	51.67	Escherichia coli strain WP7-S17-ESBL-01 plasmid pWP7-S17-ESBL-01_2, complete sequence.
NZ_AP022176	4072	49.8	Escherichia coli strain WP7-S17-ESBL-01 plasmid pWP7-S17-ESBL-01_3, complete sequence.
NZ_CP054354	82764	53.22	Escherichia coli strain SCU-172 plasmid pSCU-172-1, complete sequence.
NZ_CP054355	78886	49.9	Escherichia coli strain SCU-172 plasmid pSCU-172-2, complete sequence.
NZ_CP054356	75628	50.45	Escherichia coli strain SCU-172 plasmid pSCU-172-3, complete sequence.
NZ_CP054357	5716	42.3	Escherichia coli strain SCU-172 plasmid pSCU-172-4, complete sequence.
NZ_CP054358	5153	45.76	Escherichia coli strain SCU-172 plasmid pSCU-172-5, complete sequence.
NZ_CP054359	4110	50.44	Escherichia coli strain SCU-172 plasmid pSCU-172-6, complete sequence.
NZ_CP054360	2311	41.19	Escherichia coli strain SCU-172 plasmid pSCU-172-7, complete sequence.
NZ_CP054361	2113	47.14	Escherichia coli strain SCU-172 plasmid pSCU-172-8, complete sequence.
NZ_CP054362	1552	51.87	Escherichia coli strain SCU-172 plasmid pSCU-172-9, complete sequence.
NZ_CP023959	128761	50.83	Escherichia coli strain FDAARGOS_448 plasmid unnamed1, complete sequence.
NZ_CP023961	96807	47.75	Escherichia coli strain FDAARGOS_448 plasmid unnamed2, complete sequence.
NZ_CP023957	48550	49.97	Escherichia coli strain FDAARGOS_448 plasmid unnamed3, complete sequence.
NZ_CP023958	3264	47.09	Escherichia coli strain FDAARGOS_448 plasmid unnamed4, complete sequence.
NZ_CP027448	170848	47.42	Escherichia coli strain 2014C-3075 plasmid unnamed, complete sequence.
NZ_CP027589	75065	46.96	Escherichia coli strain 2014C-3011 plasmid unnamed1.
NZ_CP027590	92449	46.72	Escherichia coli strain 2014C-3011 plasmid unnamed2.
NZ_CP027592	17880	42.09	Escherichia coli strain 2014C-3011 plasmid unnamed3.
NZ_CP021841	118934	49.76	Escherichia coli strain EC974 plasmid pEC974-1, complete sequence.
NZ_CP021842	92385	50.38	Escherichia coli strain EC974 plasmid pEC974-2, complete sequence.
NZ_CP021843	78672	51.3	Escherichia coli strain EC974 plasmid pEC974-3, complete sequence.
NZ_CP021845	125099	50.25	Escherichia coli strain EC1515 plasmid pEC1515-1, complete sequence.
NZ_CP021846	92350	50.37	Escherichia coli strain EC1515 plasmid pEC1515-2, complete sequence.
NZ_CP021847	84091	51.73	Escherichia coli strain EC1515 plasmid pEC1515-3, complete sequence.
NZ_CP051739	172627	49.71	Escherichia coli strain SCU-105 plasmid pSCU-105-1, complete sequence.
NZ_CP051740	9703	53.52	Escherichia coli strain SCU-105 plasmid pSCU-105-2, complete sequence.
NZ_CP051741	7939	41.64	Escherichia coli strain SCU-105 plasmid pSCU-105-3, complete sequence.
NZ_CP051742	6265	44.66	Escherichia coli strain SCU-105 plasmid pSCU-105-4, complete sequence.
NZ_CP051743	4802	41.17	Escherichia coli strain SCU-105 plasmid pSCU-105-5, complete sequence.
NZ_CP062205	144932	47.55	Escherichia coli strain C311 plasmid p1, complete sequence.
NZ_CP062206	48103	44.63	Escherichia coli strain C311 plasmid p2, complete sequence.
NZ_CP042885	167966	46.47	Escherichia coli O10:H32 strain NMBU-W12E19 plasmid pNMBU-W12E19_01, complete sequence.
NZ_CP042886	88772	50.23	Escherichia coli O10:H32 strain NMBU-W12E19 plasmid pNMBU-W12E19_02, complete sequence.
NZ_CP042887	68601	52.2	Escherichia coli O10:H32 strain NMBU-W12E19 plasmid pNMBU-W12E19_03, complete sequence.
NZ_CP042888	57966	42.28	Escherichia coli O10:H32 strain NMBU-W12E19 plasmid pNMBU-W12E19_04, complete sequence.
NZ_CP042889	7939	41.63	Escherichia coli O10:H32 strain NMBU-W12E19 plasmid pNMBU-W12E19_05, complete sequence.
NZ_CP042890	4057	50.11	Escherichia coli O10:H32 strain NMBU-W12E19 plasmid pNMBU-W12E19_06, complete sequence.
NZ_CP042891	3638	52.25	Escherichia coli O10:H32 strain NMBU-W12E19 plasmid pNMBU-W12E19_07, complete sequence.
NZ_CP064848	130181	51.81	Escherichia coli strain 20 plasmid pHK01-1, complete sequence.
NZ_CP064849	5166	47.6	Escherichia coli strain 20 plasmid pHK01-2, complete sequence.
NZ_CP064850	2101	47.12	Escherichia coli strain 20 plasmid pHK01-3, complete sequence.
NZ_CP020519	120667	50.57	Escherichia coli strain 222 plasmid unnamed1, complete sequence.
NZ_CP020518	48175	44.23	Escherichia coli strain 222 plasmid unnamed2, complete sequence.
NZ_CP020517	109864	51.87	Escherichia coli strain 222 plasmid unnamed3, complete sequence.
NZ_CP020496	120668	50.57	Escherichia coli strain 103 plasmid unnamed1, complete sequence.
NZ_CP020497	48172	44.23	Escherichia coli strain 103 plasmid unnamed2, complete sequence.
NZ_CP013024	120611	53.2	Escherichia coli strain 2009C-3133 plasmid unnamed1, complete sequence.
NZ_CP013026	63800	52.11	Escherichia coli strain 2009C-3133 plasmid unnamed2, complete sequence.
NZ_CP013027	174564	49.5	Escherichia coli strain 2009C-3133 plasmid unnamed3, complete sequence.
NC_017721	5175	48.39	Escherichia coli ETEC H10407 plasmid p52, complete sequence.
NC_017723	5800	48.88	Escherichia coli ETEC H10407 plasmid p58, complete sequence.
NC_017722	66681	51.03	Escherichia coli ETEC H10407 plasmid p666, complete sequence.
NC_017724	94797	46.91	Escherichia coli ETEC H10407 plasmid p948, complete sequence.
NZ_CP032087	37009	39.81	Escherichia coli strain ATCC 25922 plasmid pL25922_1, complete sequence.
NZ_CP032088	28563	39.13	Escherichia coli strain ATCC 25922 plasmid pL25922_2, complete sequence.
NZ_CP032086	94204	44.31	Escherichia coli strain ATCC 25922 plasmid pL25922_3.
NZ_CP053248	145015	52.57	Escherichia coli strain SCU-482 plasmid pSCU-482-1, complete sequence.
NZ_CP053249	5168	47.54	Escherichia coli strain SCU-482 plasmid pSCU-482-2, complete sequence.
NZ_CP053250	1538	51.95	Escherichia coli strain SCU-482 plasmid pSCU-482-3, complete sequence.
NZ_LR882998	381858	49.72	Escherichia coli isolate L3_E36_ETEC plasmid 2, complete sequence.
NZ_LR882999	99448	51.59	Escherichia coli isolate L3_E36_ETEC plasmid 3, complete sequence.
NZ_LR130546	112588	53.36	Escherichia coli strain B36 isolate B36 plasmid 2.
NZ_LR130547	1545	51.65	Escherichia coli strain B36 isolate B36 plasmid 3.
NZ_CP054237	131660	52.54	Escherichia coli strain EcPF5 plasmid p1, complete sequence.
NZ_CP054238	1546	51.49	Escherichia coli strain EcPF5 plasmid p2, complete sequence.
NZ_CP025329	286854	50.46	Escherichia coli strain ExPEC XM plasmid unnamed.
NZ_CP010187	146575	49.06	Escherichia coli strain M6 plasmid A, complete sequence.
NZ_CP010188	6039	45.14	Escherichia coli strain M6 plasmid B, complete sequence.
NZ_CP010189	6038	49.27	Escherichia coli strain M6 plasmid C, complete sequence.
NZ_CP010190	5283	46.83	Escherichia coli strain M6 plasmid D, complete sequence.
NZ_CP055257	64941	42.46	Escherichia coli strain AH25 plasmid pAH25-1, complete sequence.
NZ_CP055258	116030	49.15	Escherichia coli strain AH25 plasmid pAH25-2, complete sequence.
NZ_CP058572	109494	49.89	Escherichia coli strain EC2 plasmid pEC2-1, complete sequence.
NZ_CP058573	88589	52.86	Escherichia coli strain EC2 plasmid pEC2-2, complete sequence.
NZ_CP010197	146524	49.06	Escherichia coli strain M9 plasmid A, complete sequence.
NZ_CP010198	6037	49.23	Escherichia coli strain M9 plasmid B, complete sequence.
NZ_CP010199	6039	45.14	Escherichia coli strain M9 plasmid C, complete sequence.
NZ_CP059918	214538	49.84	Escherichia coli strain 64.1 plasmid p1, complete sequence.
NZ_CP059919	122123	52.97	Escherichia coli strain 64.1 plasmid p2, complete sequence.
NZ_CP059920	3140	52.23	Escherichia coli strain 64.1 plasmid p3, complete sequence.
NZ_CP059921	2096	55.58	Escherichia coli strain 64.1 plasmid p4, complete sequence.
NZ_CP023845	181324	51.93	Escherichia coli strain 4/1-1 plasmid p4_1_1.1, complete sequence.
NZ_CP023846	33067	41.37	Escherichia coli strain 4/1-1 plasmid p4_1_1.2, complete sequence.
NZ_CP023847	7939	41.64	Escherichia coli strain 4/1-1 plasmid p4_1_1.3, complete sequence.
NZ_CP023848	5167	47.51	Escherichia coli strain 4/1-1 plasmid p4_1_1.4, complete sequence.
NZ_CP019394	248458	46.49	Escherichia coli strain XH992 plasmid pXH992_1, complete sequence.
NZ_CP019395	91319	52.88	Escherichia coli strain XH992 plasmid pXH992_2, complete sequence.
NZ_CP019393	63530	42.3	Escherichia coli strain XH992 plasmid pXH992_3, complete sequence.
NZ_CP023674	87524	47.78	Escherichia coli strain SMN013SH2 plasmid pO177A2, complete sequence.
NZ_CP023675	46664	41.9	Escherichia coli strain SMN013SH2 plasmid pO177B2, complete sequence.
NZ_AP022099	5344	48.48	Escherichia coli strain WP4-S18-ESBL-09 plasmid pWP4-S18-ESBL-09_1, complete sequence.
NZ_AP022100	5167	47.53	Escherichia coli strain WP4-S18-ESBL-09 plasmid pWP4-S18-ESBL-09_2, complete sequence.
NZ_AP022101	4063	51.42	Escherichia coli strain WP4-S18-ESBL-09 plasmid pWP4-S18-ESBL-09_3, complete sequence.
NZ_AP022102	3855	46.67	Escherichia coli strain WP4-S18-ESBL-09 plasmid pWP4-S18-ESBL-09_4, complete sequence.
NZ_AP022103	2188	40.95	Escherichia coli strain WP4-S18-ESBL-09 plasmid pWP4-S18-ESBL-09_5, complete sequence.
NZ_AP022104	2088	47.17	Escherichia coli strain WP4-S18-ESBL-09 plasmid pWP4-S18-ESBL-09_6, complete sequence.
NZ_CP012626	110808	51.72	Escherichia coli strain SF-468 plasmid pSF-468-1, complete sequence.
NZ_CP012627	92766	49.85	Escherichia coli strain SF-468 plasmid pSF-468-2, complete sequence.
NZ_CP012628	6647	48.61	Escherichia coli strain SF-468 plasmid pSF-468-3, complete sequence.
NZ_CP012629	4072	49.8	Escherichia coli strain SF-468 plasmid pSF-468-4, complete sequence.
NZ_CP012630	1551	51.64	Escherichia coli strain SF-468 plasmid pSF-468-5, complete sequence.
NZ_CP021936	138340	51.96	Escherichia coli strain AR_0055 plasmid unitig_2, complete sequence.
NZ_CP021937	151110	54.5	Escherichia coli strain AR_0055 plasmid unitig_3j3rc_linear, complete sequence.
NZ_CP021938	75318	51.66	Escherichia coli strain AR_0055 plasmid unitig_4, complete sequence.
NZ_CP051745	80332	50.12	Escherichia coli strain SCU-484 plasmid pSCU-484-1, complete sequence.
NZ_CP051746	6754	51.23	Escherichia coli strain SCU-484 plasmid pSCU-484-2, complete sequence.
NZ_CP051747	6320	43.91	Escherichia coli strain SCU-484 plasmid pSCU-484-3, complete sequence.
NZ_CP051748	4082	49.41	Escherichia coli strain SCU-484 plasmid pSCU-484-4, complete sequence.
NZ_CP025841	132527	46.07	Escherichia coli strain 214-4 plasmid p214_4_132, complete sequence.
NZ_CP053298	119964	50.92	Escherichia coli strain M1/5 plasmid pM1-5_120, complete sequence.
NZ_CP053297	29585	46.01	Escherichia coli strain M1/5 plasmid pM1-5_30, complete sequence.
NZ_LS992181	149633	50.61	Escherichia coli isolate Escherichia coli str. TO124 plasmid 2, complete sequence.
NZ_LS992182	133139	53.33	Escherichia coli isolate Escherichia coli str. TO124 plasmid 3, complete sequence.
NZ_CP027326	74671	48.43	Escherichia coli strain 2013C-4830 plasmid unnamed1, complete sequence.
NZ_CP027327	93170	49.99	Escherichia coli strain 2013C-4830 plasmid unnamed2, complete sequence.
NZ_CP016547	86371	43.09	Escherichia coli strain O177:H21 plasmid unnamed1, complete sequence.
NZ_CP016548	90835	52.56	Escherichia coli strain O177:H21 plasmid unnamed2, complete sequence.
NZ_CP016549	126046	47.93	Escherichia coli strain O177:H21 plasmid unnamed3, complete sequence.
NZ_CP016550	49695	42.5	Escherichia coli strain O177:H21 plasmid unnamed4, complete sequence.
NZ_CP016551	7395	44.08	Escherichia coli strain O177:H21 plasmid unnamed5, complete sequence.
NZ_CP023363	134388	51.94	Escherichia coli strain 144 plasmid 134q, complete sequence.
NZ_CP023365	92421	50.16	Escherichia coli strain 144 plasmid p92, complete sequence.
NZ_CP043035	108364	53.18	Escherichia coli strain XDL plasmid pXDL-2, complete sequence.
NZ_CP043037	6731	50.66	Escherichia coli strain XDL plasmid pXDL-4, complete sequence.
NZ_CP043038	4234	55.38	Escherichia coli strain XDL plasmid pXDL-5, complete sequence.
NZ_CP043034	224961	45.76	Escherichia coli strain XDL plasmid pXDL-CTX-M-14, complete sequence.
NZ_CP043036	61603	42.48	Escherichia coli strain XDL plasmid pXDL-MCR-1.18, complete sequence.
NZ_CP026937	131954	53.66	Escherichia coli strain CFS3292 plasmid pCFS3292-2, complete sequence.
NZ_CP026936	192449	46.64	Escherichia coli strain CFS3292 plasmid pCFS3292-1, complete sequence.
NZ_CP026938	99789	48.29	Escherichia coli strain CFS3292 plasmid pCFS3292-3, complete sequence.
NZ_CP044404	114329	50.13	Escherichia coli strain NMBU-W10C18 plasmid pNMBU-W10C18_01, complete sequence.
NZ_CP044402	49118	50.93	Escherichia coli strain NMBU-W10C18 plasmid pNMBU-W10C18_02, complete sequence.
NZ_CP044405	39455	40.67	Escherichia coli strain NMBU-W10C18 plasmid pNMBU-W10C18_03, complete sequence.
NZ_CP044406	32448	40.77	Escherichia coli strain NMBU-W10C18 plasmid pNMBU-W10C18_04, complete sequence.
NZ_CP043415	138121	49.39	Escherichia coli strain EC42405 plasmid pNTEC2-42405, complete sequence.
NZ_CP059005	79323	51.59	Escherichia coli strain 2D plasmid p2D-3, complete sequence.
NZ_CP059007	5163	47.49	Escherichia coli strain 2D plasmid p2D-5, complete sequence.
NZ_CP059008	3174	46.79	Escherichia coli strain 2D plasmid p2D-6, complete sequence.
NZ_CP059004	96499	52.38	Escherichia coli strain 2D plasmid p2D-CTX-M-14, complete sequence.
NZ_CP059006	46161	46.65	Escherichia coli strain 2D plasmid p2D-NDM-5, complete sequence.
NZ_CP066145	48488	44.36	Escherichia coli strain ZLWT plasmid unnamed1, complete sequence.
NZ_CP066146	24185	39.22	Escherichia coli strain ZLWT plasmid unnamed2, complete sequence.
NZ_CP066147	3173	46.9	Escherichia coli strain ZLWT plasmid unnamed3, complete sequence.
NZ_CP066148	1919	51.33	Escherichia coli strain ZLWT plasmid unnamed4, complete sequence.
NZ_CP063984	24185	39.22	Escherichia coli strain 25DN plasmid p25DN-A, complete sequence.
NZ_CP063985	3173	46.93	Escherichia coli strain 25DN plasmid p25DN-B, complete sequence.
NC_017629	1564	50.9	Escherichia coli ABU 83972 plasmid pABU, complete sequence.
NZ_CP025252	33924	57.39	Escherichia coli strain BH100 substr. MG2017 plasmid pApR, complete sequence.
NZ_CP025253	105801	52.02	Escherichia coli strain BH100 substr. MG2017 plasmid pBH100-1, complete sequence.
NZ_CP009073	48488	44.36	Escherichia coli ATCC 25922 plasmid unnamed_1, complete sequence.
NZ_CP009074	24185	39.22	Escherichia coli ATCC 25922 plasmid unnamed_2, complete sequence.
NZ_AP021947	210712	49.8	Escherichia coli strain WP2-S18-ESBL-08 plasmid pWP2-S18-ESBL-08_1, complete sequence.
NZ_AP021948	91630	50.07	Escherichia coli strain WP2-S18-ESBL-08 plasmid pWP2-S18-ESBL-08_2, complete sequence.
NZ_AP021949	4073	51.46	Escherichia coli strain WP2-S18-ESBL-08 plasmid pWP2-S18-ESBL-08_3, complete sequence.
NC_022661	1552	51.87	Escherichia coli JJ1886 plasmid pJJ1886_1, complete sequence.
NC_022649	5167	47.53	Escherichia coli JJ1886 plasmid pJJ1886_2, complete sequence.
NC_022662	5631	47.38	Escherichia coli JJ1886 plasmid pJJ1886_3, complete sequence.
NC_022650	55956	45.88	Escherichia coli JJ1886 plasmid pJJ1886_4, complete sequence.
NC_022651	110040	52.04	Escherichia coli JJ1886 plasmid pJJ1886_5, complete sequence.
NZ_CP054231	7154	48.6	Escherichia coli strain EcPF14 plasmid p1, complete sequence.
NZ_CP023827	125877	52.35	Escherichia coli strain 4/4 plasmid p4_4.1, complete sequence.
NZ_CP023828	67839	52.72	Escherichia coli strain 4/4 plasmid p4_4.2, complete sequence.
NZ_CP023829	33067	41.37	Escherichia coli strain 4/4 plasmid p4_4.3, complete sequence.
NZ_CP023830	7939	41.64	Escherichia coli strain 4/4 plasmid p4_4.4, complete sequence.
NZ_CP023831	5167	47.51	Escherichia coli strain 4/4 plasmid p4_4.5, complete sequence.
NZ_CP023832	4087	49.87	Escherichia coli strain 4/4 plasmid p4_4.6, complete sequence.
NZ_CP023833	4072	51.45	Escherichia coli strain 4/4 plasmid p4_4.7, complete sequence.
NZ_CP013833	126302	52.56	Escherichia coli strain JJ2434 plasmid pJJ2434_1, complete sequence.
NZ_CP013834	62183	50.73	Escherichia coli strain JJ2434 plasmid pJJ2434_2, complete sequence.
NZ_CP023164	122641	49.44	Escherichia coli O22:H8 strain RM10809-3 plasmid pRM10809-3, complete sequence.
NZ_CP043407	122112	52.56	Escherichia coli strain NMBU-W13E19 plasmid pNMBU-W13E19_01, complete sequence.
NZ_CP043408	67044	51.69	Escherichia coli strain NMBU-W13E19 plasmid pNMBU-W13E19_02, complete sequence.
NZ_CP043409	5164	47.5	Escherichia coli strain NMBU-W13E19 plasmid pNMBU-W13E19_03, complete sequence.
NZ_CP043410	4072	49.8	Escherichia coli strain NMBU-W13E19 plasmid pNMBU-W13E19_04, complete sequence.
NZ_CP043411	2101	47.17	Escherichia coli strain NMBU-W13E19 plasmid pNMBU-W13E19_05, complete sequence.
NZ_CP043412	1934	51.45	Escherichia coli strain NMBU-W13E19 plasmid pNMBU-W13E19_06, complete sequence.
NZ_CP043413	1552	51.93	Escherichia coli strain NMBU-W13E19 plasmid pNMBU-W13E19_07, complete sequence.
NZ_CP042245	285922	50.44	Escherichia coli strain PU-1 plasmid pColV-PU1, complete sequence.
NZ_CP024822	118156	50.7	Escherichia coli strain CREC-591 plasmid pCREC-591_1, complete sequence.
NZ_CP024823	64564	52.13	Escherichia coli strain CREC-591 plasmid pCREC-591_2, complete sequence.
NZ_CP024824	62815	52.65	Escherichia coli strain CREC-591 plasmid pCREC-591_3, complete sequence.
NZ_CP024825	46161	46.65	Escherichia coli strain CREC-591 plasmid pCREC-591_4, complete sequence.
NZ_LS992191	133139	53.33	Escherichia coli isolate Escherichia coli str. TO148 plasmid 2, complete sequence.
NZ_CP026933	268664	47.44	Escherichia coli strain CFS3273 plasmid pCFS3273-1, complete sequence.
NZ_CP026934	145001	50.91	Escherichia coli strain CFS3273 plasmid pCFS3273-2, complete sequence.
NZ_LR890335	139312	52.71	Escherichia coli isolate MINF_9A-sc-2280436 plasmid 2, complete sequence.
NZ_LR890336	98796	47.75	Escherichia coli isolate MINF_9A-sc-2280436 plasmid 3, complete sequence.
NZ_LR890337	62993	51.59	Escherichia coli isolate MINF_9A-sc-2280436 plasmid 4, complete sequence.
NZ_LR890338	5167	47.53	Escherichia coli isolate MINF_9A-sc-2280436 plasmid 5, complete sequence.
NZ_LR890339	4237	40.76	Escherichia coli isolate MINF_9A-sc-2280436 plasmid 6, complete sequence.
NZ_LR890340	4062	51.4	Escherichia coli isolate MINF_9A-sc-2280436 plasmid 7, complete sequence.
NZ_LR890341	1552	51.8	Escherichia coli isolate MINF_9A-sc-2280436 plasmid 8, complete sequence.
NZ_LR890342	1433	51.85	Escherichia coli isolate MINF_9A-sc-2280436 plasmid 9, complete sequence.
NZ_CP053253	174260	51.14	Escherichia coli strain SCU-204 plasmid pSCU-204-1, complete sequence.
NZ_CP053252	47276	44.58	Escherichia coli strain SCU-204 plasmid pSCU-204-2, complete sequence.
NZ_CP053254	4060	49.16	Escherichia coli strain SCU-204 plasmid pSCU-204-3, complete sequence.
NZ_CP053255	2113	47.14	Escherichia coli strain SCU-204 plasmid pSCU-204-4, complete sequence.
NZ_AP022299	123266	48.38	Escherichia coli strain BEC1-S17-ESBL-09 plasmid pBEC1-S17-ESBL-09_1, complete sequence.
NZ_AP022300	83140	52.5	Escherichia coli strain BEC1-S17-ESBL-09 plasmid pBEC1-S17-ESBL-09_2, complete sequence.
NZ_AP022301	7936	41.66	Escherichia coli strain BEC1-S17-ESBL-09 plasmid pBEC1-S17-ESBL-09_3, complete sequence.
NZ_CP032258	128033	50.95	Escherichia coli strain AR_0067 plasmid unnamed1, complete sequence.
NZ_CP032259	49921	44.82	Escherichia coli strain AR_0067 plasmid unnamed2, complete sequence.
NZ_CP032260	87423	53.04	Escherichia coli strain AR_0067 plasmid unnamed3, complete sequence.
NZ_CP032262	75026	50.42	Escherichia coli strain AR_0067 plasmid unnamed4, complete sequence.
NZ_CP025921	146395	47.8	Escherichia coli strain 103605 plasmid p103605_146, complete sequence.
NZ_CP025922	83017	51.91	Escherichia coli strain 103605 plasmid p103605_83, complete sequence.
NZ_CP061207	116466	51.46	Escherichia coli strain DA61218 plasmid pDA61218-116, complete sequence.
NZ_AP017618	116529	50.65	Escherichia coli strain MRY15-117 plasmid pMRY15-117_1, complete sequence.
NZ_AP017619	61223	42.44	Escherichia coli strain MRY15-117 plasmid pMRY15-117_2, complete sequence.
NZ_CP014668	101201	51.45	Escherichia coli strain ECONIH2 plasmid pECO-bc6, complete sequence.
NZ_CP014669	113852	53.69	Escherichia coli strain ECONIH2 plasmid pKpQIL-571, complete sequence.
NZ_LR740759	223939	48.76	Escherichia coli strain BEN5202 isolate laying hen 51 weeks old plasmid paAPEC5202.
NZ_LR740760	92214	51.33	Escherichia coli strain BEN5202 isolate laying hen 51 weeks old plasmid pbAPEC5202.
NZ_CP025917	146395	47.8	Escherichia coli strain 120899 plasmid p120899_146, complete sequence.
NZ_CP025919	50268	49.5	Escherichia coli strain 120899 plasmid p120899_50, complete sequence.
NZ_CP025918	76877	52.47	Escherichia coli strain 120899 plasmid p120899_76, complete sequence.
NZ_CP030791	197773	49.13	Escherichia coli strain APEC O2-211 plasmid pAPEC-O2-211A-ColV, complete sequence.
NZ_CP030792	4231	46.09	Escherichia coli strain APEC O2-211 plasmid pAPEC-O2-211B, complete sequence.
NZ_CP030793	2096	55.58	Escherichia coli strain APEC O2-211 plasmid pAPEC-O2-211C, complete sequence.
NZ_CP061765	98015	52.44	Escherichia coli O19:H7 strain 730V1 plasmid unnamed1, complete sequence.
NZ_CP061766	3256	56.11	Escherichia coli O19:H7 strain 730V1 plasmid unnamed2, complete sequence.
NZ_CP061767	3272	51.5	Escherichia coli O19:H7 strain 730V1 plasmid unnamed3.
NZ_CP010158	128612	49.75	Escherichia coli strain D10 plasmid A, complete sequence.
NZ_CP010159	6822	48.8	Escherichia coli strain D10 plasmid B, complete sequence.
NZ_CP069499	118909	49.07	Escherichia coli strain FDAARGOS_1258 plasmid unnamed, complete sequence.
NZ_HG941719	135602	52.48	Escherichia coli O25b:H4-ST131 strain EC958 plasmid pEC958, complete sequence.
NZ_HG941720	4080	49.73	Escherichia coli O25b:H4-ST131 strain EC958 plasmid pEC958B, complete sequence.
NZ_CP059908	193291	49.56	Escherichia coli strain 181.1 plasmid p1, complete sequence.
NZ_CP059909	111912	50.77	Escherichia coli strain 181.1 plasmid p2, complete sequence.
NZ_CP059910	99361	48.19	Escherichia coli strain 181.1 plasmid p3, complete sequence.
NZ_CP059911	3245	35.1	Escherichia coli strain 181.1 plasmid p4, complete sequence.
NZ_CP059912	1079	43.84	Escherichia coli strain 181.1 plasmid p5, complete sequence.
NZ_CP019954	160021	49.21	Escherichia coli M8 plasmid unnamed1, complete sequence.
NZ_CP019955	6075	49.4	Escherichia coli M8 plasmid unnamed2, complete sequence.
NZ_CP019956	4707	45.51	Escherichia coli M8 plasmid unnamed3, complete sequence.
NZ_CP024863	139059	51.53	Escherichia coli strain AR_0015 plasmid unitig_1_pilon, complete sequence.
NZ_CP024864	88768	52.16	Escherichia coli strain AR_0015 plasmid unitig_2_pilon, complete sequence.
NZ_CP024865	48511	44.72	Escherichia coli strain AR_0015 plasmid unitig_3_pilon, complete sequence.
NZ_CP032202	140509	52.04	Escherichia coli strain AR_0086 plasmid unnamed1, complete sequence.
NZ_CP032203	41865	51.14	Escherichia coli strain AR_0086 plasmid unnamed2, complete sequence.
NZ_CP013657	143748	52.75	Escherichia coli strain uk_P46212 plasmid unnamed, complete sequence.
NZ_CP025857	108475	49.69	Escherichia coli strain 504838 plasmid p504838_108, complete sequence.
NZ_CP025858	88871	46.21	Escherichia coli strain 504838 plasmid p504838_88, complete sequence.
NZ_CP010214	146496	49.06	Escherichia coli strain M15 plasmid A, complete sequence.
NZ_CP010215	61058	51.91	Escherichia coli strain M15 plasmid B, complete sequence.
NZ_CP010216	6039	45.16	Escherichia coli strain M15 plasmid C, complete sequence.
NZ_CP010217	6036	49.25	Escherichia coli strain M15 plasmid D, complete sequence.
NZ_CP010218	5312	47.14	Escherichia coli strain M15 plasmid E, complete sequence.
NZ_CP026208	298633	51.65	Escherichia coli strain ECONIH5 plasmid pECO-109b, complete sequence.
NZ_CP026203	35036	49.33	Escherichia coli strain ECONIH5 plasmid pECO-a7e8, complete sequence.
NZ_CP026206	191344	51.6	Escherichia coli strain ECONIH5 plasmid pECO-cbb3, complete sequence.
NZ_CP026207	202687	52.16	Escherichia coli strain ECONIH5 plasmid pECO-dc1b, complete sequence.
NZ_CP026204	76500	46.89	Escherichia coli strain ECONIH5 plasmid pKPC-bca9, complete sequence.
NZ_CP026205	77775	50.19	Escherichia coli strain ECONIH5 plasmid pKPC-e3ee, complete sequence.
NZ_CP026209	42693	34.67	Escherichia coli strain ECONIH5 plasmid unnamed, complete sequence.
NZ_CP010220	57582	42.09	Escherichia coli strain M18 plasmid A, complete sequence.
NZ_CP010222	146552	49.07	Escherichia coli strain M19 plasmid A, complete sequence.
NZ_CP010223	61063	51.93	Escherichia coli strain M19 plasmid B, complete sequence.
NZ_CP010224	6039	45.16	Escherichia coli strain M19 plasmid C, complete sequence.
NZ_CP010225	11321	48.12	Escherichia coli strain M19 plasmid D, complete sequence.
NZ_LR130556	136397	51.88	Escherichia coli strain MS14385 isolate MS14385 plasmid 2.
NZ_LR130557	112419	46.41	Escherichia coli strain MS14385 isolate MS14385 plasmid 3.
NZ_LR130558	52792	49.07	Escherichia coli strain MS14385 isolate MS14385 plasmid 4.
NZ_LR130559	47288	44.59	Escherichia coli strain MS14385 isolate MS14385 plasmid 5.
NZ_LR130560	6850	43.99	Escherichia coli strain MS14385 isolate MS14385 plasmid 6.
NZ_LR130561	5167	47.53	Escherichia coli strain MS14385 isolate MS14385 plasmid 7.
NZ_CP019013	109057	46.52	Escherichia coli strain Ecol_AZ162 plasmid pECAZ162_2, complete sequence.
NZ_CP019014	142829	53.43	Escherichia coli strain Ecol_AZ162 plasmid pECAZ162_KPC, complete sequence.
NZ_CP028585	92537	47.73	Escherichia coli strain WCHEC4533 plasmid p1_000533, complete sequence.
NZ_CP028586	5167	47.51	Escherichia coli strain WCHEC4533 plasmid p2_000533, complete sequence.
NZ_CP028587	150853	51.64	Escherichia coli strain WCHEC4533 plasmid pCTXM15_000533, complete sequence.
NZ_CP028588	42856	50.96	Escherichia coli strain WCHEC4533 plasmid pNDM4_000533, complete sequence.
NZ_CP041434	80039	50.07	Escherichia coli strain STEC313 plasmid pSTEC313, complete sequence.
NZ_CP043951	228062	46.01	Escherichia coli strain ST95-32 plasmid pST95-32-1, complete sequence.
NZ_CP043952	189994	49.2	Escherichia coli strain ST95-32 plasmid pST95-32-2, complete sequence.
NZ_CP023821	113737	52.34	Escherichia coli strain 7/2 plasmid p7_2.1, complete sequence.
NZ_CP023822	42913	40.82	Escherichia coli strain 7/2 plasmid p7_2.2, complete sequence.
NZ_CP023823	34371	48.65	Escherichia coli strain 7/2 plasmid p7_2.3, complete sequence.
NZ_CP023824	4072	49.78	Escherichia coli strain 7/2 plasmid p7_2.4, complete sequence.
NZ_CP023825	1552	51.74	Escherichia coli strain 7/2 plasmid p7_2.5, complete sequence.
NZ_CP025911	146395	47.8	Escherichia coli strain 204446 plasmid p204446_146, complete sequence.
NZ_CP025912	92548	51.8	Escherichia coli strain 204446 plasmid p204446_92, complete sequence.
NZ_LR130565	133379	52.13	Escherichia coli strain MS14387 isolate MS14387 plasmid 2.
NZ_LR130566	4082	49.44	Escherichia coli strain MS14387 isolate MS14387 plasmid 3.
NZ_CP051726	103780	51.72	Escherichia coli strain SCU-112 plasmid pSCU-112-1, complete sequence.
NZ_CP022155	145220	52.87	Escherichia coli strain ABWA45 plasmid pABWA45_1, complete sequence.
NZ_CP022156	113793	54.61	Escherichia coli strain ABWA45 plasmid pABWA45_2, complete sequence.
NZ_CP022157	57232	50.11	Escherichia coli strain ABWA45 plasmid pABWA45_3, complete sequence.
NZ_CP022158	47900	46.56	Escherichia coli strain ABWA45 plasmid pABWA45_4, complete sequence.
NZ_CP022159	7537	57.68	Escherichia coli strain ABWA45 plasmid pABWA45_5.
NZ_CP032875	92538	47.73	Escherichia coli strain WCHEC000837 plasmid p1_000837, complete sequence.
NZ_CP032876	5167	47.51	Escherichia coli strain WCHEC000837 plasmid p2_000837, complete sequence.
NZ_CP032877	150853	51.64	Escherichia coli strain WCHEC000837 plasmid pCTXM15_000837, complete sequence.
NZ_CP032878	45484	51.28	Escherichia coli strain WCHEC000837 plasmid pNDM4_000837, complete sequence.
NZ_AP022160	94990	50.2	Escherichia coli strain WP5-S18-ESBL-07 plasmid pWP5-S18-ESBL-07_1, complete sequence.
NZ_LR890199	125802	51.2	Escherichia coli isolate MINF_1D-sc-2280456 plasmid 2, complete sequence.
NZ_LR890200	95734	48.35	Escherichia coli isolate MINF_1D-sc-2280456 plasmid 3, complete sequence.
NZ_LR890201	29794	41.43	Escherichia coli isolate MINF_1D-sc-2280456 plasmid 4, complete sequence.
NZ_CP041430	80039	50.07	Escherichia coli strain STEC367 plasmid pSTEC367, complete sequence.
NZ_CP023354	62312	51.9	Escherichia coli strain 746 plasmid p62, complete sequence.
NZ_CP023355	72470	51.5	Escherichia coli strain 746 plasmid p72, complete sequence.
NZ_CP023356	94881	50.11	Escherichia coli strain 746 plasmid p95, complete sequence.
NZ_CP023347	142368	47.59	Escherichia coli strain ETEC-2265 plasmid unnamed1, complete sequence.
NZ_CP023348	88757	51.79	Escherichia coli strain ETEC-2265 plasmid unnamed2, complete sequence.
NZ_CP024279	28860	48.98	Escherichia coli strain ATCC 43896 plasmid unnamed1.
NZ_CP024280	52655	45.59	Escherichia coli strain ATCC 43896 plasmid unnamed2.
NZ_CP024281	84894	53.28	Escherichia coli strain ATCC 43896 plasmid unnamed3, complete sequence.
NZ_CP051695	105394	52.36	Escherichia coli strain SCU-313 plasmid pSCU-313-1, complete sequence.
NZ_CP051696	67142	50.89	Escherichia coli strain SCU-313 plasmid pSCU-313-2, complete sequence.
NZ_CP051697	4067	49.86	Escherichia coli strain SCU-313 plasmid pSCU-313-3, complete sequence.
NZ_CP020510	118182	52.99	Escherichia coli strain 165 plasmid unnamed1, complete sequence.
NZ_CP020511	85008	50.01	Escherichia coli strain 165 plasmid unnamed2, complete sequence.
NZ_CP020512	46159	46.65	Escherichia coli strain 165 plasmid unnamed3, complete sequence.
NZ_CP020513	46056	50.99	Escherichia coli strain 165 plasmid unnamed4, complete sequence.
NZ_CP026493	1552	51.8	Escherichia coli strain HS13-1 plasmid pHS13-1-Col, complete sequence.
NZ_CP026494	201203	49.85	Escherichia coli strain HS13-1 plasmid pHS13-1-IncF, complete sequence.
NZ_CP026492	264344	46.78	Escherichia coli strain HS13-1 plasmid pHS13-1-IncHI2, complete sequence.
NZ_CP034390	257270	46.86	Escherichia coli strain RS571 plasmid pRS571-MCR-1.1, complete sequence.
NZ_CP034391	3191	35.19	Escherichia coli strain RS571 plasmid punnamed3.
NZ_CP034392	1369	31.85	Escherichia coli strain RS571 plasmid punnamed4.
NZ_CP024132	35098	41.84	Escherichia coli strain 14EC007 plasmid p14EC007a, complete sequence.
NZ_CP024133	190293	50.93	Escherichia coli strain 14EC007 plasmid p14EC007b, complete sequence.
NZ_CP042247	142705	47.96	Escherichia coli strain BCE049 plasmid pBCE049-1, complete sequence.
NZ_CP042248	102714	49.77	Escherichia coli strain BCE049 plasmid pBCE049-2, complete sequence.
NZ_CP042249	57435	42.59	Escherichia coli strain BCE049 plasmid pBCE049-3, complete sequence.
NZ_CP041299	195702	49.47	Escherichia coli O1:H42 strain CLSC36 plasmid pCys-1, complete sequence.
NZ_CP069452	109644	51.57	Escherichia coli strain FDAARGOS_1256 plasmid unnamed, complete sequence.
NC_009837	174241	49.65	Escherichia coli APEC O1 plasmid pAPEC-O1-ColBM, complete sequence.
NC_009838	241387	46.43	Escherichia coli APEC O1 plasmid pAPEC-O1-R, complete sequence.
NZ_CP014317	1552	51.87	Escherichia coli JJ1887 plasmid pJJ1887-1, complete sequence.
NZ_CP014318	5167	47.53	Escherichia coli JJ1887 plasmid pJJ1887-2, complete sequence.
NZ_CP014319	5631	47.38	Escherichia coli JJ1887 plasmid pJJ1887-3, complete sequence.
NZ_CP014321	107507	52.02	Escherichia coli JJ1887 plasmid pJJ1887-4, complete sequence.
NZ_CP014320	130603	50.82	Escherichia coli JJ1887 plasmid pJJ1887-5, complete sequence.
NZ_CP069590	127965	52.16	Escherichia coli strain FDAARGOS_1266 plasmid unnamed1, complete sequence.
NZ_CP069591	5631	47.38	Escherichia coli strain FDAARGOS_1266 plasmid unnamed2, complete sequence.
NZ_CP069592	1552	51.87	Escherichia coli strain FDAARGOS_1266 plasmid unnamed3, complete sequence.
NZ_CP037450	48403	44.38	Escherichia coli strain ATCC 25922 plasmid unnamed, complete sequence.
NZ_CP071523	49605	51.11	Escherichia coli strain UPEC129 plasmid p1_UPEC129, complete sequence.
NZ_CP071524	5627	47.08	Escherichia coli strain UPEC129 plasmid p2_UPEC129, complete sequence.
NZ_CP058575	122379	52.08	Escherichia coli strain EC1 plasmid pEC1-1, complete sequence.
NZ_CP058576	77194	52.85	Escherichia coli strain EC1 plasmid pEC1-2, complete sequence.
NZ_CP058577	14294	48.06	Escherichia coli strain EC1 plasmid pEC1-3, complete sequence.
NZ_CP027450	34867	39.61	Escherichia coli strain 2014C-3097 plasmid unnamed1, complete sequence.
NZ_CP027451	173649	49.56	Escherichia coli strain 2014C-3097 plasmid unnamed2, complete sequence.
NZ_CP041338	161372	51.71	Escherichia coli strain CCUG 73778 plasmid pSUH-1, complete sequence.
NZ_CP041339	79945	51.63	Escherichia coli strain CCUG 73778 plasmid pSUH-2, complete sequence.
NZ_CP041340	5627	47.04	Escherichia coli strain CCUG 73778 plasmid pSUH-3, complete sequence.
NZ_CP041341	5166	47.56	Escherichia coli strain CCUG 73778 plasmid pSUH-4, complete sequence.
NZ_CP041342	5057	49.06	Escherichia coli strain CCUG 73778 plasmid pSUH-5, complete sequence.
NZ_CP041343	1718	51.69	Escherichia coli strain CCUG 73778 plasmid pSUH-6, complete sequence.
NZ_AP022651	102029	52.46	Escherichia coli strain 09-02E plasmid p1-09-02E, complete sequence.
NZ_AP022652	45497	40.82	Escherichia coli strain 09-02E plasmid p2-09-02E, complete sequence.
NZ_AP022653	5207	48.67	Escherichia coli strain 09-02E plasmid p3-09-02E, complete sequence.
NZ_AP022654	5164	47.44	Escherichia coli strain 09-02E plasmid p4-09-02E, complete sequence.
NZ_AP022655	4082	49.41	Escherichia coli strain 09-02E plasmid p5-09-02E, complete sequence.
NZ_AP022656	2739	52.14	Escherichia coli strain 09-02E plasmid p6-09-02E, complete sequence.
NZ_AP022657	2113	47.14	Escherichia coli strain 09-02E plasmid p7-09-02E, complete sequence.
NZ_AP022658	2029	52.34	Escherichia coli strain 09-02E plasmid p8-09-02E, complete sequence.
NZ_AP022659	1549	51.32	Escherichia coli strain 09-02E plasmid p9-09-02E, complete sequence.
NZ_CP043218	102028	49.17	Escherichia coli O80:H26 strain EC-107 plasmid pET6.1-IncY, complete sequence.
NZ_CP043219	94175	53.86	Escherichia coli O80:H26 strain EC-107 plasmid pET6.2-IncFII, complete sequence.
NZ_CP043220	64997	42.42	Escherichia coli O80:H26 strain EC-107 plasmid pET6.3-IncI2, complete sequence.
NZ_CP043221	1552	51.68	Escherichia coli O80:H26 strain EC-107 plasmid pET6.4-ColRNAI, complete sequence.
NZ_CP021289	147172	51.62	Escherichia coli strain PA45B plasmid pPA45B, complete sequence.
NZ_CP026854	133843	49.29	Escherichia coli strain MS7163 plasmid pMS7163A, complete sequence.
NZ_CP026855	84078	53.21	Escherichia coli strain MS7163 plasmid pMS7163B, complete sequence.
NZ_CP024290	36473	40.99	Escherichia coli O178:H19 strain 2012C-4431 plasmid unnamed1, complete sequence.
NZ_CP024291	111697	48.63	Escherichia coli O178:H19 strain 2012C-4431 plasmid unnamed2, complete sequence.
NZ_CP024292	85054	49.99	Escherichia coli O178:H19 strain 2012C-4431 plasmid unnamed3, complete sequence.
NZ_CP013832	145221	52.87	Escherichia coli strain CD306 plasmid pCD306, complete sequence.
NZ_CP048338	155486	52.19	Escherichia coli strain 142 plasmid p142_A-OXA181, complete sequence.
NZ_CP048339	59239	51.61	Escherichia coli strain 142 plasmid p142_B, complete sequence.
NZ_CP048340	47545	44.6	Escherichia coli strain 142 plasmid p142_C, complete sequence.
NZ_CP048341	7939	41.62	Escherichia coli strain 142 plasmid p142_D, complete sequence.
NZ_CP048342	5164	47.52	Escherichia coli strain 142 plasmid p142_E, complete sequence.
NZ_CP048343	1458	50.89	Escherichia coli strain 142 plasmid p142_F, complete sequence.
NZ_CP024128	50013	47.02	Escherichia coli strain 14EC001 plasmid p14EC001a, complete sequence.
NZ_CP024129	123884	49.47	Escherichia coli strain 14EC001 plasmid p14EC001b, complete sequence.
NZ_CP024130	88460	51.49	Escherichia coli strain 14EC001 plasmid p14EC001c, complete sequence.
NZ_CP024651	14241	53.31	Escherichia coli strain BH100 substr. MG2014 plasmid pAp, complete sequence.
NZ_CP024652	107274	51.91	Escherichia coli strain BH100 substr. MG2014 plasmid pBH100-1, complete sequence.
NZ_AP022479	91989	53.25	Escherichia coli strain STN0717-11 plasmid pSTN0717-11-1, complete sequence.
NZ_AP022480	5627	47.08	Escherichia coli strain STN0717-11 plasmid pSTN0717-11-2, complete sequence.
NZ_AP022481	2866	33.46	Escherichia coli strain STN0717-11 plasmid pSTN0717-11-3, complete sequence.
NZ_AP022537	151109	54.39	Escherichia coli strain THO-008 plasmid pTHO-008-1, complete sequence.
NZ_AP022538	5627	47.08	Escherichia coli strain THO-008 plasmid pTHO-008-2, complete sequence.
NZ_AP022539	2866	33.46	Escherichia coli strain THO-008 plasmid pTHO-008-3, complete sequence.
NZ_LR130563	114230	51.02	Escherichia coli strain MS14384 isolate MS14384 plasmid 2.
NZ_CP028195	68950	47.27	Escherichia coli strain CFSAN018748 plasmid pGMI14-004_1, complete sequence.
NZ_CP028193	52918	49.26	Escherichia coli strain CFSAN018748 plasmid pGMI14-004_2, complete sequence.
NZ_CP028194	48684	44.41	Escherichia coli strain CFSAN018748 plasmid pGMI14-004_3, complete sequence.
NZ_CP065614	261275	46.16	Escherichia coli strain FDAARGOS_944 plasmid unnamed, complete sequence.
NC_010488	130440	50.81	Escherichia coli SMS-3-5 plasmid pSMS35_130, complete sequence.
NC_010487	3565	43.03	Escherichia coli SMS-3-5 plasmid pSMS35_3, complete sequence.
NC_010486	4074	49.56	Escherichia coli SMS-3-5 plasmid pSMS35_4, complete sequence.
NC_010485	8909	46.84	Escherichia coli SMS-3-5 plasmid pSMS35_8, complete sequence.
NZ_AP022050	121254	50.48	Escherichia coli strain WP4-S17-ESBL-08 plasmid pWP4-S17-ESBL-08_1, complete sequence.
NZ_AP022051	5167	47.53	Escherichia coli strain WP4-S17-ESBL-08 plasmid pWP4-S17-ESBL-08_2, complete sequence.
NZ_AP022052	4170	45.85	Escherichia coli strain WP4-S17-ESBL-08 plasmid pWP4-S17-ESBL-08_3, complete sequence.
NZ_AP022053	3373	55.23	Escherichia coli strain WP4-S17-ESBL-08 plasmid pWP4-S17-ESBL-08_4, complete sequence.
NZ_AP022054	2089	47.25	Escherichia coli strain WP4-S17-ESBL-08 plasmid pWP4-S17-ESBL-08_5, complete sequence.
NZ_AP022172	187669	50.74	Escherichia coli strain WP5-S18-ESBL-09 plasmid pWP5-S18-ESBL-09_1, complete sequence.
NZ_CP051610	113351	52.65	Escherichia coli O25b:H4-ST131 strain 2019_APHA plasmid pAPHA_2019.
NZ_CP051611	5775	49.52	Escherichia coli O25b:H4-ST131 strain 2019_APHA plasmid pAPHA_2019_2, complete sequence.
NZ_CP051612	1907	33.09	Escherichia coli O25b:H4-ST131 strain 2019_APHA plasmid pAPHA_2019_3, complete sequence.
NZ_CP051613	1808	32.25	Escherichia coli O25b:H4-ST131 strain 2019_APHA plasmid pAPHA_2019_4, complete sequence.
NZ_CP051614	1549	51	Escherichia coli O25b:H4-ST131 strain 2019_APHA plasmid pAPHA_2019_5, complete sequence.
NZ_CP027367	125561	50.8	Escherichia coli strain 89-3156 plasmid unnamed, complete sequence.
NC_007941	114230	51.03	Escherichia coli UTI89 plasmid pUTI89, complete sequence.
NZ_CP014496	114223	51.02	Escherichia coli strain SaT040 plasmid pSaT040, complete sequence.
NZ_LR740777	152011	49.28	Escherichia coli strain BEN2908 isolate 1 day old chicken plasmid pAPEC2908.
NZ_CP051220	107230	49.72	Escherichia coli strain SFE8 plasmid pSCZP1, complete sequence.
NZ_CP051221	46160	46.65	Escherichia coli strain SFE8 plasmid pSCZP2, complete sequence.
NZ_CP035478	149312	51.82	Escherichia coli strain U13A plasmid pU13A_A, complete sequence.
NZ_CP035479	69518	50.71	Escherichia coli strain U13A plasmid pU13A_B, complete sequence.
NZ_CP035480	5209	48.55	Escherichia coli strain U13A plasmid pU13A_C, complete sequence.
NZ_CP035481	8166	49.4	Escherichia coli strain U13A plasmid pU13A_D, complete sequence.
NZ_CP035482	5632	47.41	Escherichia coli strain U13A plasmid pU13A_E, complete sequence.
NZ_CP035483	1506	50.2	Escherichia coli strain U13A plasmid pU13A_F, complete sequence.
NZ_CP035517	149317	51.82	Escherichia coli strain U14A plasmid pU14A_A, complete sequence.
NZ_CP035518	69473	50.64	Escherichia coli strain U14A plasmid pU14A_B, complete sequence.
NZ_CP035519	5209	48.55	Escherichia coli strain U14A plasmid pU14A_C, complete sequence.
NZ_CP035520	8166	49.4	Escherichia coli strain U14A plasmid pU14A_D, complete sequence.
NZ_CP035521	5632	47.41	Escherichia coli strain U14A plasmid pU14A_E, complete sequence.
NZ_CP035522	1506	50.2	Escherichia coli strain U14A plasmid pU14A_F, complete sequence.
NZ_LR890694	112822	51.05	Escherichia coli isolate MSB1_4E-sc-2280348 plasmid 2, complete sequence.
NZ_LR890695	5167	47.51	Escherichia coli isolate MSB1_4E-sc-2280348 plasmid 3, complete sequence.
NZ_LR890696	4064	49.88	Escherichia coli isolate MSB1_4E-sc-2280348 plasmid 4, complete sequence.
NZ_LR890697	1549	51	Escherichia coli isolate MSB1_4E-sc-2280348 plasmid 5, complete sequence.
NZ_CP010135	91607	49.85	Escherichia coli strain D1 plasmid A, complete sequence.
NZ_CP010136	55203	48.18	Escherichia coli strain D1 plasmid B, complete sequence.
NZ_LR025102	94720	54.09	Escherichia coli isolate EC-1639 plasmid 2, complete sequence.
NZ_LR025103	31016	40.71	Escherichia coli isolate EC-1639 plasmid 4, complete sequence.
NZ_LR025104	21855	42.87	Escherichia coli isolate EC-1639 plasmid 5, complete sequence.
NZ_LR025105	63589	51.22	Escherichia coli isolate EC-1639 plasmid pOXA-48_1639, complete sequence.
NZ_CP012632	93074	53.01	Escherichia coli strain SF-173 plasmid pSF-173-1, complete sequence.
NZ_CP023389	74094	51.18	Escherichia coli strain 1105 plasmid p74, complete sequence.
NZ_LR890271	118421	50.39	Escherichia coli isolate MINF_7C-sc-2280452 plasmid 2, complete sequence.
NZ_LR890272	95130	50.23	Escherichia coli isolate MINF_7C-sc-2280452 plasmid 3, complete sequence.
NZ_LR890273	92830	48.04	Escherichia coli isolate MINF_7C-sc-2280452 plasmid 4, complete sequence.
NZ_LR890274	85915	52.98	Escherichia coli isolate MINF_7C-sc-2280452 plasmid 5, complete sequence.
NZ_LR890275	12424	55.68	Escherichia coli isolate MINF_7C-sc-2280452 plasmid 6, complete sequence.
NZ_LR890276	2136	51.97	Escherichia coli isolate MINF_7C-sc-2280452 plasmid 7, complete sequence.
NZ_CP025848	148526	47.73	Escherichia coli strain 602354 plasmid p602354_148, complete sequence.
NZ_CP067242	144175	51.8	Escherichia coli strain P19_598 plasmid pP19_598a, complete sequence.
NZ_CP067243	3902	43.23	Escherichia coli strain P19_598 plasmid pP19_598b, complete sequence.
NZ_CP067244	1552	51.74	Escherichia coli strain P19_598 plasmid pP19_598c, complete sequence.
NZ_CP063775	58468	51.54	Escherichia coli O25b:H4-ST131 plasmid pHK02-1, complete sequence.
NZ_CP063776	7937	41.63	Escherichia coli O25b:H4-ST131 plasmid pHK02-2, complete sequence.
NZ_CP063777	5167	47.51	Escherichia coli O25b:H4-ST131 plasmid pHK02-3, complete sequence.
NZ_CP063778	4073	51.44	Escherichia coli O25b:H4-ST131 plasmid pHK02-4, complete sequence.
NZ_CP028120	86617	52.77	Escherichia coli O43 str. RM10042 plasmid pRM10042-1, complete sequence.
NZ_CP028121	109466	48.09	Escherichia coli O43 str. RM10042 plasmid pRM10042-2, complete sequence.
NZ_CP028123	8120	49.68	Escherichia coli O43 str. RM10042 plasmid pRM10042-3, complete sequence.
NZ_CP008715	120653	51.69	Escherichia coli strain ST648 isolate Pleural Effusion of Patients with Empyema Thoracis plasmid pEC648_1, complete sequence.
NZ_CP008716	5167	47.46	Escherichia coli strain ST648 isolate Pleural Effusion of Patients with Empyema Thoracis plasmid pEC648_2, complete sequence.
NZ_CP008717	4237	40.76	Escherichia coli strain ST648 isolate Pleural Effusion of Patients with Empyema Thoracis plasmid pEC648_3, complete sequence.
NZ_CP008718	4073	51.61	Escherichia coli strain ST648 isolate Pleural Effusion of Patients with Empyema Thoracis plasmid pEC648_4, complete sequence.
NZ_CP008719	2101	47.17	Escherichia coli strain ST648 isolate Pleural Effusion of Patients with Empyema Thoracis plasmid pEC648_5, complete sequence.
NZ_CP008720	1544	51.49	Escherichia coli strain ST648 isolate Pleural Effusion of Patients with Empyema Thoracis plasmid pEC648_6, complete sequence.
NZ_CP008721	1459	50.93	Escherichia coli strain ST648 isolate Pleural Effusion of Patients with Empyema Thoracis plasmid pEC648_7, complete sequence.
NZ_CP018955	101186	51.95	Escherichia coli strain Ecol_316 plasmid pEC316_2, complete sequence.
NZ_CP018954	97654	53.55	Escherichia coli strain Ecol_316 plasmid pEC316_3, complete sequence.
NZ_CP018956	216226	53.25	Escherichia coli strain Ecol_316 plasmid pEC316_KPC, complete sequence.
NZ_CP035488	3250	47.08	Escherichia coli strain NissleGFP_pZE21 plasmid pMut1, complete sequence.
NZ_CP035487	5591	45.91	Escherichia coli strain NissleGFP_pZE21 plasmid pMut2, complete sequence.
NZ_CP035489	1978	54.35	Escherichia coli strain NissleGFP_pZE21 plasmid pZE21, complete sequence.
NZ_CP023342	5514	46.01	Escherichia coli Nissle 1917 plasmid pMUT2, complete sequence.
NZ_CP022687	11499	45.07	Escherichia coli Nissle 1917 plasmid pNissle1.
NZ_CP051752	5892	46.69	Escherichia coli strain SCU-301 plasmid pSCU-301-1, complete sequence.
NZ_AP021964	105095	52.17	Escherichia coli strain WP3-W18-CRE-03 plasmid pWP3-W18-CRE-03_1, complete sequence.
NZ_AP021965	47584	40.83	Escherichia coli strain WP3-W18-CRE-03 plasmid pWP3-W18-CRE-03_2, complete sequence.
NZ_AP021966	5167	47.51	Escherichia coli strain WP3-W18-CRE-03 plasmid pWP3-W18-CRE-03_3, complete sequence.
NZ_AP021967	4072	51.47	Escherichia coli strain WP3-W18-CRE-03 plasmid pWP3-W18-CRE-03_4, complete sequence.
NZ_AP021968	2113	47.14	Escherichia coli strain WP3-W18-CRE-03 plasmid pWP3-W18-CRE-03_5, complete sequence.
NZ_CP024852	167974	50.15	Escherichia coli strain AR_0006 plasmid tig00000164, complete sequence.
NZ_CP024853	35812	48.8	Escherichia coli strain AR_0006 plasmid tig00000176, complete sequence.
NZ_CP024854	96413	50.27	Escherichia coli strain AR_0006 plasmid tig00000311, complete sequence.
NZ_CP051701	120617	51.26	Escherichia coli strain SCU-125 plasmid pSCU-125-1, complete sequence.
NZ_CP051702	93339	53.44	Escherichia coli strain SCU-125 plasmid pSCU-125-2, complete sequence.
NZ_CP051704	5153	45.78	Escherichia coli strain SCU-125 plasmid pSCU-125-4, complete sequence.
NZ_CP051705	2337	41.68	Escherichia coli strain SCU-125 plasmid pSCU-125-5, complete sequence.
NZ_AP022534	111171	51.22	Escherichia coli strain THO-006 plasmid pTHO-006-1, complete sequence.
NZ_AP022535	101966	51.99	Escherichia coli strain THO-006 plasmid pTHO-006-2, complete sequence.
NZ_CP022228	92538	47.73	Escherichia coli strain WCHEC96200 plasmid p1_000200, complete sequence.
NZ_CP022227	150853	51.64	Escherichia coli strain WCHEC96200 plasmid pCTXM15_000200, complete sequence.
NZ_CP022226	45476	51.29	Escherichia coli strain WCHEC96200 plasmid pNDM4_WCHEC96200, complete sequence.
NZ_CP019274	15162	53.32	Escherichia coli strain 13P477T plasmid p13P477T-1, complete sequence.
NZ_CP021100	6162	54.98	Escherichia coli strain 13P477T plasmid p13P477T-10, complete sequence.
NZ_CP021099	6032	50.88	Escherichia coli strain 13P477T plasmid p13P477T-11, complete sequence.
NZ_CP019275	37446	51.25	Escherichia coli strain 13P477T plasmid p13P477T-2, complete sequence.
NZ_CP019276	91701	52.54	Escherichia coli strain 13P477T plasmid p13P477T-3, complete sequence.
NZ_CP019277	105415	43.08	Escherichia coli strain 13P477T plasmid p13P477T-4, complete sequence.
NZ_CP019278	11397	50.92	Escherichia coli strain 13P477T plasmid p13P477T-5, complete sequence.
NZ_CP019279	22592	53.18	Escherichia coli strain 13P477T plasmid p13P477T-6, complete sequence.
NZ_CP021103	80206	47.36	Escherichia coli strain 13P477T plasmid p13P477T-7, complete sequence.
NZ_CP021102	8639	49.75	Escherichia coli strain 13P477T plasmid p13P477T-8, complete sequence.
NZ_CP021101	8618	48.49	Escherichia coli strain 13P477T plasmid p13P477T-9, complete sequence.
NZ_CP051736	116897	50.87	Escherichia coli strain SCU-108 plasmid pSCU-108-1, complete sequence.
NZ_CP051737	71625	50.68	Escherichia coli strain SCU-108 plasmid pSCU-108-2, complete sequence.
NZ_CP069460	36471	52.01	Escherichia coli strain FDAARGOS_1249 plasmid unnamed1, complete sequence.
NZ_CP069469	9269	45.52	Escherichia coli strain FDAARGOS_1249 plasmid unnamed10.
NZ_CP069461	114299	50.55	Escherichia coli strain FDAARGOS_1249 plasmid unnamed2, complete sequence.
NZ_CP069462	3360	54.94	Escherichia coli strain FDAARGOS_1249 plasmid unnamed3, complete sequence.
NZ_CP069463	2365	40.55	Escherichia coli strain FDAARGOS_1249 plasmid unnamed4.
NZ_CP069464	1935	44.29	Escherichia coli strain FDAARGOS_1249 plasmid unnamed5.
NZ_CP069465	1763	43.39	Escherichia coli strain FDAARGOS_1249 plasmid unnamed6.
NZ_CP069466	1582	51.14	Escherichia coli strain FDAARGOS_1249 plasmid unnamed7.
NZ_CP069467	1096	49.82	Escherichia coli strain FDAARGOS_1249 plasmid unnamed8.
NZ_CP069468	11379	51.17	Escherichia coli strain FDAARGOS_1249 plasmid unnamed9.
NZ_CP051712	116892	50.87	Escherichia coli strain SCU-123 plasmid pSCU-123-1, complete sequence.
NZ_CP051713	94616	52.76	Escherichia coli strain SCU-123 plasmid pSCU-123-2, complete sequence.
NZ_CP063516	149434	51.82	Escherichia coli strain EH01-18-04-A plasmid pEH01-18-04-A_1, complete sequence.
NZ_CP063517	69098	51.06	Escherichia coli strain EH01-18-04-A plasmid pEH01-18-04-A_2, complete sequence.
NZ_CP012636	149683	51.06	Escherichia coli strain SF-088 plasmid pSF-088-1, complete sequence.
NZ_CP012637	5167	47.51	Escherichia coli strain SF-088 plasmid pSF-088-2, complete sequence.
NZ_CP012638	3904	51.02	Escherichia coli strain SF-088 plasmid pSF-088-3, complete sequence.
NZ_AP022550	88121	52.53	Escherichia coli strain THO-015 plasmid pTHO-015-1, complete sequence.
NZ_AP022551	46459	45.02	Escherichia coli strain THO-015 plasmid pTHO-015-2, complete sequence.
NZ_AP022552	46229	43.57	Escherichia coli strain THO-015 plasmid pTHO-015-3, complete sequence.
NZ_CP014498	209768	53.46	Escherichia coli strain ZH193 plasmid pZH193, complete sequence.
NZ_CP043182	64997	42.42	Escherichia coli O2:H6 strain PG20180057 plasmid pPG20180057.1-IncI2, complete sequence.
NZ_CP028382	160675	49.43	Escherichia coli strain RM10466 plasmid pRM10466-1, complete sequence.
NZ_CP028383	67750	50.95	Escherichia coli strain RM10466 plasmid pRM10466-2, complete sequence.
NZ_CP029577	139191	51.85	Escherichia coli strain DA33135 plasmid pDA33135-139, complete sequence.
NZ_CP029578	70197	51.99	Escherichia coli strain DA33135 plasmid pDA33135-70, complete sequence.
NZ_AP017621	116529	50.65	Escherichia coli strain MRY15-131 plasmid pMRY15-131_1, complete sequence.
NZ_AP017622	60722	42.39	Escherichia coli strain MRY15-131 plasmid pMRY15-131_2, complete sequence.
NZ_CP018207	113140	52.14	Escherichia coli strain MRSN346647 plasmid pMRSN346647_113.1, complete sequence.
NZ_CP018208	4074	49.88	Escherichia coli strain MRSN346647 plasmid pMRSN346647_4.1, complete sequence.
NZ_CP021176	60961	42.36	Escherichia coli strain 5CRE51 plasmid p5CRE51-MCR-1, complete sequence.
NZ_CP021177	154099	48.53	Escherichia coli strain 5CRE51 plasmid p5CRE51-NDM-9.
NZ_AP022045	148598	51.26	Escherichia coli strain WP4-S17-ESBL-03 plasmid pWP4-S17-ESBL-03_1, complete sequence.
NZ_AP022046	5210	48.54	Escherichia coli strain WP4-S17-ESBL-03 plasmid pWP4-S17-ESBL-03_2, complete sequence.
NZ_AP022047	5167	47.51	Escherichia coli strain WP4-S17-ESBL-03 plasmid pWP4-S17-ESBL-03_3, complete sequence.
NZ_AP022048	3372	55.13	Escherichia coli strain WP4-S17-ESBL-03 plasmid pWP4-S17-ESBL-03_4, complete sequence.
NZ_CP027343	131410	49.38	Escherichia coli strain 2014C-4587 plasmid unnamed, complete sequence.
NZ_AP022327	139450	51.96	Escherichia coli O25:H4 strain 18044 plasmid p18044_1, complete sequence.
NZ_AP022328	67915	51.54	Escherichia coli O25:H4 strain 18044 plasmid p18044_2, complete sequence.
NZ_AP022329	5167	47.51	Escherichia coli O25:H4 strain 18044 plasmid p18044_3, complete sequence.
NZ_AP022330	4060	51.45	Escherichia coli O25:H4 strain 18044 plasmid p18044_4, complete sequence.
NZ_AP022331	1551	51.64	Escherichia coli O25:H4 strain 18044 plasmid p18044_5, complete sequence.
NZ_CP048648	126964	50.49	Escherichia coli strain GW-AmxH19 plasmid unnamed, complete sequence.
NZ_CP024887	102544	51.46	Escherichia coli strain AR_0017 plasmid unitig_1_pilon, complete sequence.
NZ_CP023358	100008	48.6	Escherichia coli strain 317 plasmid p100, complete sequence.
NZ_CP051734	110400	50.27	Escherichia coli strain SCU-109 plasmid pSCU-109-1, complete sequence.
NZ_CP014523	114223	51.02	Escherichia coli strain ZH063 plasmid pZH063_1, complete sequence.
NZ_CP014524	49467	51.92	Escherichia coli strain ZH063 plasmid pZH063_2, complete sequence.
NZ_CP010207	138950	48.47	Escherichia coli strain M11 plasmid A, complete sequence.
NZ_CP010208	56029	47.22	Escherichia coli strain M11 plasmid B, complete sequence.
NZ_CP010209	61005	51.9	Escherichia coli strain M11 plasmid C, complete sequence.
NZ_CP010210	6038	49.27	Escherichia coli strain M11 plasmid D, complete sequence.
NZ_CP010211	6039	45.16	Escherichia coli strain M11 plasmid E, complete sequence.
NZ_CP010212	5282	46.82	Escherichia coli strain M11 plasmid F, complete sequence.
NC_011747	133853	49.29	Escherichia coli S88 plasmid pECOS88, complete sequence.
NZ_CP018975	95926	49.56	Escherichia coli strain Ecol_545 plasmid pEC545_1, complete sequence.
NZ_CP018973	70152	52.29	Escherichia coli strain Ecol_545 plasmid pEC545_3, complete sequence.
NZ_CP018972	4073	51.46	Escherichia coli strain Ecol_545 plasmid pEC545_4, complete sequence.
NZ_CP018971	3164	46.33	Escherichia coli strain Ecol_545 plasmid pEC545_5, complete sequence.
NZ_CP018974	70876	51.28	Escherichia coli strain Ecol_545 plasmid pEC545_KPC, complete sequence.
NZ_LS992169	172923	51.6	Escherichia coli isolate Escherichia coli str. TO60 plasmid 2, complete sequence.
NZ_LS992170	46051	41.21	Escherichia coli isolate Escherichia coli str. TO60 plasmid 3, complete sequence.
NZ_CP027580	54544	52.76	Escherichia coli strain 2013C-4282 plasmid unnamed1.
NZ_CP027581	118822	48.79	Escherichia coli strain 2013C-4282 plasmid unnamed2, complete sequence.
NZ_CP053232	128584	51.3	Escherichia coli strain SCU-306 plasmid pSCU-306-1, complete sequence.
NZ_CP053233	112229	46.31	Escherichia coli strain SCU-306 plasmid pSCU-306-2, complete sequence.
NZ_CP061750	129153	51.93	Escherichia coli O15:H12 strain 2273-PO3 plasmid unnamed1, complete sequence.
NZ_CP061751	96198	50.1	Escherichia coli O15:H12 strain 2273-PO3 plasmid unnamed2, complete sequence.
NZ_CP061752	5472	47.2	Escherichia coli O15:H12 strain 2273-PO3 plasmid unnamed3, complete sequence.
NZ_CP061753	14381	57.23	Escherichia coli O15:H12 strain 2273-PO3 plasmid unnamed4, complete sequence.
NZ_AP018785	169561	51.06	Escherichia coli strain SK1144 plasmid pSK1144.
NZ_CP021536	244955	51.43	Escherichia coli strain AR_0119 plasmid unitig_2, complete sequence.
NZ_CP021537	97474	47.84	Escherichia coli strain AR_0119 plasmid unitig_3, complete sequence.
NZ_CP021538	64372	50.16	Escherichia coli strain AR_0119 plasmid unitig_4, complete sequence.
NZ_CP016008	40158	41.19	Escherichia coli strain NGF1 plasmid pNGF1_pCROD2_like, complete sequence.
NZ_CP016009	8556	47.46	Escherichia coli strain NGF1 plasmid pNGF1_pCol_let_like, complete sequence.
NZ_CP054215	89178	52.56	Escherichia coli strain EcPF40 plasmid p1, complete sequence.
NZ_CP054216	88657	50.17	Escherichia coli strain EcPF40 plasmid p2, complete sequence.
NZ_CP054217	5167	47.51	Escherichia coli strain EcPF40 plasmid p3, complete sequence.
NZ_CP054218	2113	47.14	Escherichia coli strain EcPF40 plasmid p4, complete sequence.
NZ_CP031707	127578	46.91	Escherichia coli strain R1 plasmid pVirR1, complete sequence.
NZ_CP021727	224039	45.78	Escherichia coli strain Combat11I9 plasmid pCombat11I9-1, complete sequence.
NZ_CP021728	169487	50.17	Escherichia coli strain Combat11I9 plasmid pCombat11I9-2, complete sequence.
NZ_CP021729	114968	47.57	Escherichia coli strain Combat11I9 plasmid pCombat11I9-3, complete sequence.
NZ_CP021730	58890	51.4	Escherichia coli strain Combat11I9 plasmid pCombat11I9-4, complete sequence.
NZ_LS999561	134692	50.83	Escherichia coli isolate EC-TO143 plasmid 2, complete sequence.
NZ_LS999562	102557	49.7	Escherichia coli isolate EC-TO143 plasmid 3, complete sequence.
NZ_LS999563	55148	40.92	Escherichia coli isolate EC-TO143 plasmid 4, complete sequence.
NZ_LS999564	26531	49.77	Escherichia coli isolate EC-TO143 plasmid 5, complete sequence.
NZ_CP030940	257394	47.19	Escherichia coli strain AMSHJX01 plasmid pAMSH1, complete sequence.
NZ_CP061187	157028	46.21	Escherichia coli strain LD67-1 plasmid pLD67-1-157kb, complete sequence.
NZ_CP061188	165427	50.37	Escherichia coli strain LD67-1 plasmid pLD67-1-165kb, complete sequence.
NZ_CP061186	66568	42.57	Escherichia coli strain LD67-1 plasmid pLD67-1-MCR1, complete sequence.
NZ_CP054346	39154	49.74	Escherichia coli strain SCU-176 plasmid pSCU-176-1, complete sequence.
NZ_CP054347	5631	47.36	Escherichia coli strain SCU-176 plasmid pSCU-176-2, complete sequence.
NZ_CP054348	5213	48.55	Escherichia coli strain SCU-176 plasmid pSCU-176-3, complete sequence.
NZ_CP054349	5167	47.57	Escherichia coli strain SCU-176 plasmid pSCU-176-4, complete sequence.
NZ_CP054350	4064	49.88	Escherichia coli strain SCU-176 plasmid pSCU-176-5, complete sequence.
NZ_CP054351	3896	45.82	Escherichia coli strain SCU-176 plasmid pSCU-176-6, complete sequence.
NZ_CP054352	1822	44.57	Escherichia coli strain SCU-176 plasmid pSCU-176-7, complete sequence.
NZ_CP028484	128911	52.21	Escherichia coli strain E41-1 plasmid p1, complete sequence.
NZ_CP028485	86657	50.09	Escherichia coli strain E41-1 plasmid p2, complete sequence.
NZ_CP028486	52864	51.09	Escherichia coli strain E41-1 plasmid p3, complete sequence.
NZ_CP072312	84178	49.02	Escherichia coli strain E105 plasmid pE105-1, complete sequence.
NZ_CP072313	36351	42.89	Escherichia coli strain E105 plasmid pE105-2, complete sequence.
NZ_CP072314	60072	45.31	Escherichia coli strain E105 plasmid pE105-3, complete sequence.
NZ_CP072315	234576	46.65	Escherichia coli strain E105 plasmid pE105-4, complete sequence.
NZ_CP072316	33308	41.84	Escherichia coli strain E105 plasmid pE105-5, complete sequence.
NZ_CP072317	68833	51.08	Escherichia coli strain E105 plasmid pE105-6, complete sequence.
NZ_CP027535	101207	49.88	Escherichia coli strain AR_0081 plasmid unnamed1, complete sequence.
NZ_CP027537	100279	50.7	Escherichia coli strain AR_0081 plasmid unnamed2, complete sequence.
NZ_CP027536	72482	50.73	Escherichia coli strain AR_0081 plasmid unnamed3, complete sequence.
NZ_CP025863	142377	47.59	Escherichia coli strain 504237 plasmid p504237_142, complete sequence.
NZ_CP025864	36127	41.11	Escherichia coli strain 504237 plasmid p504237_36, complete sequence.
NC_017661	5360	46.01	Escherichia coli KO11FL plasmid pRK2, complete sequence.
NZ_CP020546	133639	49.39	Escherichia coli strain ZJ3920 plasmid pZJ3920-1, complete sequence.
NZ_CP020547	127809	50.13	Escherichia coli strain ZJ3920 plasmid pZJ3920-2, complete sequence.
NZ_CP020548	60959	42.35	Escherichia coli strain ZJ3920 plasmid pZJ3920-3, complete sequence.
NZ_CP028321	114229	51.02	Escherichia coli O18:H1 strain CFSAN067215 plasmid p0.1229_1, complete sequence.
NZ_CP028322	96272	53.64	Escherichia coli O18:H1 strain CFSAN067215 plasmid p0.1229_2, complete sequence.
NZ_CP028323	12894	44.63	Escherichia coli O18:H1 strain CFSAN067215 plasmid p0.1229_3, complete sequence.
NZ_CP020049	141885	52.02	Escherichia coli strain AR_0118 plasmid unitig_1, complete sequence.
NZ_CP020050	113431	52.53	Escherichia coli strain AR_0118 plasmid unitig_2, complete sequence.
NZ_CP020051	91291	47.67	Escherichia coli strain AR_0118 plasmid unitig_3, complete sequence.
NZ_CP035468	151747	51.84	Escherichia coli strain U12A plasmid pU12A_A, complete sequence.
NZ_CP035469	87354	50.33	Escherichia coli strain U12A plasmid pU12A_B, complete sequence.
NZ_CP035470	69518	50.71	Escherichia coli strain U12A plasmid pU12A_C, complete sequence.
NZ_CP035471	37447	50.2	Escherichia coli strain U12A plasmid pU12A_D, complete sequence.
NZ_CP035472	5209	48.55	Escherichia coli strain U12A plasmid pU12A_E, complete sequence.
NZ_CP035473	8166	49.4	Escherichia coli strain U12A plasmid pU12A_F, complete sequence.
NZ_CP035474	5632	47.41	Escherichia coli strain U12A plasmid pU12A_G, complete sequence.
NZ_CP035475	1506	50.2	Escherichia coli strain U12A plasmid pU12A_H, complete sequence.
NZ_CP010317	106397	50.7	Escherichia coli strain 789 plasmid pAPEC-O78-2.
NZ_CP010318	4599	50.45	Escherichia coli strain 789 plasmid pAPEC-O78-3.
NZ_CP010316	144859	50.43	Escherichia coli strain 789 plasmid pAPEC-O78-ColV.
NZ_AP021999	105864	51.82	Escherichia coli strain WP3-W18-ESBL-07 plasmid pWP3-W18-ESBL-07_1, complete sequence.
NZ_AP022000	6669	48.58	Escherichia coli strain WP3-W18-ESBL-07 plasmid pWP3-W18-ESBL-07_2, complete sequence.
NZ_AP022001	5167	47.51	Escherichia coli strain WP3-W18-ESBL-07 plasmid pWP3-W18-ESBL-07_3, complete sequence.
NZ_AP022002	4087	49.84	Escherichia coli strain WP3-W18-ESBL-07 plasmid pWP3-W18-ESBL-07_4, complete sequence.
NZ_CP021208	86725	49.55	Escherichia coli strain strain Z247 plasmid p2474-3, complete sequence.
NZ_CP021209	223982	45.83	Escherichia coli strain strain Z247 plasmid p2474-MCR1, complete sequence.
NZ_CP021210	75553	50.78	Escherichia coli strain strain Z247 plasmid p2474-NDM1, complete sequence.
NZ_CP071440	98697	53.02	Escherichia coli strain EcPNK004 plasmid p1, complete sequence.
NZ_CP027438	74904	43.14	Escherichia coli strain 2012C-4221 plasmid unnamed1, complete sequence.
NZ_CP027439	107188	49.48	Escherichia coli strain 2012C-4221 plasmid unnamed2, complete sequence.
NZ_CP049102	168051	50.73	Escherichia coli strain EC28 plasmid p2, complete sequence.
NZ_CP049104	6126	42.1	Escherichia coli strain EC28 plasmid p4, complete sequence.
NZ_CP049105	6063	51.1	Escherichia coli strain EC28 plasmid p5, complete sequence.
NZ_CP049106	4073	51.46	Escherichia coli strain EC28 plasmid p6, complete sequence.
NZ_CP049103	63295	42.18	Escherichia coli strain EC28 plasmid pCTX-M-15, complete sequence.
NZ_CP015161	88023	49.85	Escherichia coli strain Eco889 plasmid pECO-93a, complete sequence.
NZ_CP015160	212180	51.49	Escherichia coli strain Eco889 plasmid pECO-fce, complete sequence.
NZ_CP021180	135720	51.87	Escherichia coli strain 81009 plasmid pEC-81009, complete sequence.
NZ_CP069439	168315	51.02	Escherichia coli strain FDAARGOS_1260 plasmid unnamed.
NZ_CP010877	1506	50.2	Escherichia coli strain MNCRE44 plasmid pMNCRE44_1, complete sequence.
NZ_CP010878	4088	49.88	Escherichia coli strain MNCRE44 plasmid pMNCRE44_2, complete sequence.
NZ_CP010879	5167	47.51	Escherichia coli strain MNCRE44 plasmid pMNCRE44_3, complete sequence.
NZ_CP010880	30855	41.78	Escherichia coli strain MNCRE44 plasmid pMNCRE44_4, complete sequence.
NZ_CP010881	116803	52.16	Escherichia coli strain MNCRE44 plasmid pMNCRE44_5, complete sequence.
NZ_CP010882	122966	51.27	Escherichia coli strain MNCRE44 plasmid pMNCRE44_6, complete sequence.
NZ_CP054220	128954	50.9	Escherichia coli strain EcPF18 plasmid p1, complete sequence.
NZ_CP054221	86740	50.15	Escherichia coli strain EcPF18 plasmid p2, complete sequence.
NZ_CP054222	5167	47.51	Escherichia coli strain EcPF18 plasmid p3, complete sequence.
NZ_CP054223	1506	50.2	Escherichia coli strain EcPF18 plasmid p4, complete sequence.
NZ_CP015140	129154	52.54	Escherichia coli strain Ecol_732 plasmid pEC732_2, complete sequence.
NZ_CP015141	82588	53.28	Escherichia coli strain Ecol_732 plasmid pEC732_3, complete sequence.
NZ_CP015142	4072	49.8	Escherichia coli strain Ecol_732 plasmid pEC732_4, complete sequence.
NZ_CP015143	1549	51	Escherichia coli strain Ecol_732 plasmid pEC732_5, complete sequence.
NZ_CP015144	4204	46.15	Escherichia coli strain Ecol_732 plasmid pEC732_6.
NZ_CP015139	186826	52.13	Escherichia coli strain Ecol_732 plasmid pEC732_IMP14, complete sequence.
NZ_CP069560	67959	52.72	Escherichia coli strain FDAARGOS_1259 plasmid unnamed1, complete sequence.
NZ_CP069561	144098	51.98	Escherichia coli strain FDAARGOS_1259 plasmid unnamed2, complete sequence.
NZ_CP069562	4087	49.87	Escherichia coli strain FDAARGOS_1259 plasmid unnamed3, complete sequence.
NZ_CP051720	83503	52.91	Escherichia coli strain SCU-116 plasmid pSCU-116-1, complete sequence.
NZ_CP051721	65217	49.79	Escherichia coli strain SCU-116 plasmid pSCU-116-2, complete sequence.
NZ_CP051722	5153	45.74	Escherichia coli strain SCU-116 plasmid pSCU-116-3, complete sequence.
NZ_CP051723	4072	49.78	Escherichia coli strain SCU-116 plasmid pSCU-116-4, complete sequence.
NZ_CP051724	1538	51.95	Escherichia coli strain SCU-116 plasmid pSCU-116-5, complete sequence.
NZ_CP062812	109586	51.14	Escherichia coli strain Res13-Sevr-PER07-33 plasmid unnamed476, complete sequence.
NZ_CP062813	97371	50.21	Escherichia coli strain Res13-Sevr-PER07-33 plasmid unnamed529, complete sequence.
NZ_CP062814	114826	45.62	Escherichia coli strain Res13-Sevr-PER07-33 plasmid unnamed920, complete sequence.
NZ_CP015077	133735	52.73	Escherichia coli strain Ecol_448 plasmid pEC448_1, complete sequence.
NZ_CP015078	71170	50.19	Escherichia coli strain Ecol_448 plasmid pEC448_OXA163, complete sequence.
NZ_CP015913	65888	43.11	Escherichia coli strain 210205630 isolate 210205630 plasmid pSLy1, complete sequence.
NZ_CP015914	129035	51.05	Escherichia coli strain 210205630 isolate 210205630 plasmid pSLy2, complete sequence.
NZ_CP015915	114472	46.42	Escherichia coli strain 210205630 isolate 210205630 plasmid pSLy3, complete sequence.
NZ_CP015916	100096	49.94	Escherichia coli strain 210205630 isolate 210205630 plasmid pSLy4, complete sequence.
NZ_CP015917	8972	49.22	Escherichia coli strain 210205630 isolate 210205630 plasmid pSLy5, complete sequence.
NZ_CP020515	158757	51.69	Escherichia coli strain 219 plasmid unnamed, complete sequence.
NZ_CP027458	107796	48.91	Escherichia coli strain 88-3493 plasmid unnamed, complete sequence.
NZ_CP011135	70533	52.33	Escherichia coli VR50 plasmid pVR50A, complete sequence.
NZ_CP011136	97864	49.53	Escherichia coli VR50 plasmid pVR50B, complete sequence.
NZ_CP011137	6989	47.59	Escherichia coli VR50 plasmid pVR50C, complete sequence.
NZ_CP011138	5631	47.33	Escherichia coli VR50 plasmid pVR50D, complete sequence.
NZ_CP011139	5164	47.5	Escherichia coli VR50 plasmid pVR50E, complete sequence.
NZ_CP011140	4075	50.16	Escherichia coli VR50 plasmid pVR50F, complete sequence.
NZ_CP011141	2089	47.15	Escherichia coli VR50 plasmid pVR50G, complete sequence.
NZ_CP011142	1783	56.87	Escherichia coli VR50 plasmid pVR50H, complete sequence.
NZ_CP011143	1552	51.87	Escherichia coli VR50 plasmid pVR50I, complete sequence.
NZ_CP041679	88891	49.94	Escherichia coli strain ESBL 15 plasmid unnamed1, complete sequence.
NZ_CP041680	5330	44.75	Escherichia coli strain ESBL 15 plasmid unnamed2, complete sequence.
NZ_CP041681	4734	47.59	Escherichia coli strain ESBL 15 plasmid unnamed3, complete sequence.
NZ_CP059282	140350	51.55	Escherichia coli strain C9 plasmid pC9, complete sequence.
NZ_LR882058	98997	49.44	Escherichia coli isolate 2014-01-7375 plasmid 2, complete sequence.
NZ_LR882059	82142	47.81	Escherichia coli isolate 2014-01-7375 plasmid 3, complete sequence.
NZ_LR882060	47686	43.13	Escherichia coli isolate 2014-01-7375 plasmid 4, complete sequence.
NZ_LR882061	42660	52.46	Escherichia coli isolate 2014-01-7375 plasmid 5, complete sequence.
NZ_CP059280	141169	51.56	Escherichia coli strain C7 plasmid pC7, complete sequence.
NZ_CP018998	99006	52.37	Escherichia coli strain Ecol_AZ153 plasmid pECAZ153_2, complete sequence.
NZ_CP018997	4921	47.33	Escherichia coli strain Ecol_AZ153 plasmid pECAZ153_3, complete sequence.
NZ_CP018996	4073	51.46	Escherichia coli strain Ecol_AZ153 plasmid pECAZ153_4, complete sequence.
NZ_CP018999	146162	54.13	Escherichia coli strain Ecol_AZ153 plasmid pECAZ153_KPC, complete sequence.
NZ_CP027585	160576	49.43	Escherichia coli strain 00-3076 plasmid unnamed, complete sequence.
NZ_CP054233	129632	51.52	Escherichia coli strain EcPF7 plasmid p1, complete sequence.
NZ_CP054234	4072	51.47	Escherichia coli strain EcPF7 plasmid p2, complete sequence.
NZ_CP054235	1551	51.06	Escherichia coli strain EcPF7 plasmid p3, complete sequence.
NZ_AP022088	183772	48.46	Escherichia coli strain WP4-S18-ESBL-07 plasmid pWP4-S18-ESBL-07_1, complete sequence.
NZ_AP022089	110167	45.94	Escherichia coli strain WP4-S18-ESBL-07 plasmid pWP4-S18-ESBL-07_2, complete sequence.
NZ_AP022090	80029	52.92	Escherichia coli strain WP4-S18-ESBL-07 plasmid pWP4-S18-ESBL-07_3, complete sequence.
NZ_AP022091	74261	51.7	Escherichia coli strain WP4-S18-ESBL-07 plasmid pWP4-S18-ESBL-07_4, complete sequence.
NZ_AP022092	6796	47.5	Escherichia coli strain WP4-S18-ESBL-07 plasmid pWP4-S18-ESBL-07_5, complete sequence.
NZ_AP022093	5344	48.47	Escherichia coli strain WP4-S18-ESBL-07 plasmid pWP4-S18-ESBL-07_6, complete sequence.
NZ_CP029748	276880	49.09	Escherichia coli strain 2016C-3878 plasmid pMCR1-PA, complete sequence.
NZ_CP041997	278067	49.21	Escherichia coli strain AR Bank #0349 plasmid pAR349, complete sequence.
NZ_CP069489	14130	53.17	Escherichia coli strain FDAARGOS_1264 plasmid unnamed1.
NZ_CP069490	11357	50.83	Escherichia coli strain FDAARGOS_1264 plasmid unnamed2.
NZ_CP069491	9318	48	Escherichia coli strain FDAARGOS_1264 plasmid unnamed3.
NZ_CP069492	5251	49.21	Escherichia coli strain FDAARGOS_1264 plasmid unnamed4, complete sequence.
NZ_CP069493	5219	48.67	Escherichia coli strain FDAARGOS_1264 plasmid unnamed5, complete sequence.
NZ_CP069494	1549	51	Escherichia coli strain FDAARGOS_1264 plasmid unnamed6, complete sequence.
NZ_CP015996	93029	50.53	Escherichia coli strain S51 plasmid pS51_1, complete sequence.
NZ_CP015997	98216	47.24	Escherichia coli strain S51 plasmid pS51_2, complete sequence.
NZ_CP066807	131861	47.21	Escherichia coli strain TCM3e1 plasmid unnamed1, complete sequence.
NZ_CP066808	191962	51.72	Escherichia coli strain TCM3e1 plasmid unnamed2, complete sequence.
NC_017630	114550	50.93	Escherichia coli UM146 plasmid pUM146, complete sequence.
NZ_CP053733	141846	50.22	Escherichia coli strain CP55_Sichuan plasmid pCP55-141k, complete sequence.
NZ_CP053732	156025	49.23	Escherichia coli strain CP55_Sichuan plasmid pCP55-IncFIB, complete sequence.
NZ_CP053734	70770	51.66	Escherichia coli strain CP55_Sichuan plasmid pCP55-IncFII, complete sequence.
NZ_CP053735	33309	41.84	Escherichia coli strain CP55_Sichuan plasmid pCP55-IncX4, complete sequence.
NZ_LR882979	112055	48.08	Escherichia coli isolate L3_CS7_E2980 plasmid 2, complete sequence.
NZ_LR882980	72255	52.42	Escherichia coli isolate L3_CS7_E2980 plasmid 3, complete sequence.
NZ_LR882981	48305	50.31	Escherichia coli isolate L3_CS7_E2980 plasmid 4, complete sequence.
NZ_CP020117	107210	52.32	Escherichia coli strain AR_0104 plasmid unitig_5, complete sequence.
NZ_CP020118	111212	46.28	Escherichia coli strain AR_0104 plasmid unitig_6, complete sequence.
NZ_CP020119	51515	52.86	Escherichia coli strain AR_0104 plasmid unitig_7, complete sequence.
NZ_CP062856	4593	50.47	Escherichia coli O20:H12 strain Res13-Lact-PEB17-18 plasmid unnamed259, complete sequence.
NZ_CP062857	44395	41.07	Escherichia coli O20:H12 strain Res13-Lact-PEB17-18 plasmid unnamed47, complete sequence.
NZ_CP062858	150153	51.17	Escherichia coli O20:H12 strain Res13-Lact-PEB17-18 plasmid unnamed973, complete sequence.
NZ_CP030335	75281	52.66	Escherichia coli strain AR_451 plasmid unnamed1, complete sequence.
NZ_CP030340	34927	48.59	Escherichia coli strain AR_451 plasmid unnamed2.
NZ_CP030339	35509	50.91	Escherichia coli strain AR_451 plasmid unnamed3.
NZ_CP030336	16907	48.95	Escherichia coli strain AR_451 plasmid unnamed4.
NZ_CP030338	1549	51	Escherichia coli strain AR_451 plasmid unnamed5, complete sequence.
NZ_CP030333	4082	49.49	Escherichia coli strain AR_451 plasmid unnamed6, complete sequence.
NZ_CP030334	7588	45.03	Escherichia coli strain AR_451 plasmid unnamed7.
NZ_CP051616	134872	51.88	Escherichia coli O25b:H4-ST131 strain 2017_APHA plasmid pAPHA_2017_1, complete sequence.
NZ_CP051617	8554	47.62	Escherichia coli O25b:H4-ST131 strain 2017_APHA plasmid pAPHA_2017_2, complete sequence.
NZ_CP051618	5631	47.38	Escherichia coli O25b:H4-ST131 strain 2017_APHA plasmid pAPHA_2017_3, complete sequence.
NZ_CP051619	5167	47.51	Escherichia coli O25b:H4-ST131 strain 2017_APHA plasmid pAPHA_2017_4, complete sequence.
NZ_CP051620	1549	51	Escherichia coli O25b:H4-ST131 strain 2017_APHA plasmid pAPHA_2017_5, complete sequence.
NZ_CP032263	155784	49.91	Escherichia coli strain AR_0089 plasmid unnamed1, complete sequence.
NZ_CP032264	101614	50.04	Escherichia coli strain AR_0089 plasmid unnamed2, complete sequence.
NZ_CP006633	3319	43.33	Escherichia coli PCN033 plasmid p1PCN033, complete sequence.
NZ_CP006634	4086	49.36	Escherichia coli PCN033 plasmid p2PCN033, complete sequence.
NZ_CP006635	161511	50.43	Escherichia coli PCN033 plasmid p3PCN033, complete sequence.
NZ_CP041412	2916	45.95	Escherichia coli strain STEC719 plasmid pSTEC719_1, complete sequence.
NZ_CP041413	82584	49.78	Escherichia coli strain STEC719 plasmid pSTEC719_2, complete sequence.
NZ_CP041414	84140	51.11	Escherichia coli strain STEC719 plasmid pSTEC719_3, complete sequence.
NZ_CP041415	85426	49.51	Escherichia coli strain STEC719 plasmid pSTEC719_4, complete sequence.
NZ_CP062872	9695	49.69	Escherichia coli strain Res13-Lact-PEA14-20 plasmid unnamed29, complete sequence.
NZ_CP062873	110363	51.15	Escherichia coli strain Res13-Lact-PEA14-20 plasmid unnamed476, complete sequence.
NZ_CP062874	123046	50.02	Escherichia coli strain Res13-Lact-PEA14-20 plasmid unnamed539, complete sequence.
NZ_CP062875	1546	51.42	Escherichia coli strain Res13-Lact-PEA14-20 plasmid unnamednovel_1, complete sequence.
NZ_CP026754	90045	50.75	Escherichia coli strain AR_0077 plasmid tig00000042_pilon, complete sequence.
NZ_CP023367	111523	48.69	Escherichia coli strain 1428 plasmid p111, complete sequence.
NZ_CP023368	48774	44.52	Escherichia coli strain 1428 plasmid p48, complete sequence.
NZ_CP023369	66332	51.19	Escherichia coli strain 1428 plasmid p66, complete sequence.
NZ_CP023370	96402	50.1	Escherichia coli strain 1428 plasmid p96, complete sequence.
NZ_CP025883	100473	47.26	Escherichia coli strain 503440 plasmid p503440_100, complete sequence.
NZ_CP025882	52051	46.43	Escherichia coli strain 503440 plasmid p503440_52, complete sequence.
NZ_CP025885	68971	50.54	Escherichia coli strain 503440 plasmid p503440_68, complete sequence.
NZ_CP025884	78134	45.89	Escherichia coli strain 503440 plasmid p503440_78, complete sequence.
NZ_LR883007	46243	50.47	Escherichia coli isolate L5_E1779_ETEC plasmid 2, complete sequence.
NZ_LR883008	142377	47.59	Escherichia coli isolate L5_E1779_ETEC plasmid 3, complete sequence.
NZ_LR883009	88759	51.8	Escherichia coli isolate L5_E1779_ETEC plasmid 4, complete sequence.
NZ_LR883010	82464	51.02	Escherichia coli isolate L5_E1779_ETEC plasmid 5, complete sequence.
NZ_LR883011	61528	50.49	Escherichia coli isolate L5_E1779_ETEC plasmid 6, complete sequence.
NZ_CP053282	151546	51.22	Escherichia coli strain SCU-308 plasmid pSCU-308-1, complete sequence.
NZ_CP053283	68199	51.66	Escherichia coli strain SCU-308 plasmid pSCU-308-2, complete sequence.
NZ_CP024142	66596	42.71	Escherichia coli strain 14EC029 plasmid p14EC029a, complete sequence.
NZ_CP024143	254423	46.82	Escherichia coli strain 14EC029 plasmid p14EC029b, complete sequence.
NZ_CP024144	96973	51.46	Escherichia coli strain 14EC029 plasmid p14EC029c, complete sequence.
NZ_CP024145	106478	48.6	Escherichia coli strain 14EC029 plasmid p14EC029d, complete sequence.
NZ_CP024146	88553	50.37	Escherichia coli strain 14EC029 plasmid p14EC029e, complete sequence.
NZ_CP025860	101617	47.64	Escherichia coli strain 504239 plasmid p504239_101, complete sequence.
NZ_CP025861	155850	48.92	Escherichia coli strain 504239 plasmid p504239_155, complete sequence.
NC_009787	34367	51.62	Escherichia coli O139:H28 str. E24377A plasmid pETEC_35, complete sequence.
NC_009791	5033	49.63	Escherichia coli O139:H28 str. E24377A plasmid pETEC_5, complete sequence.
NC_009789	6199	52.57	Escherichia coli O139:H28 str. E24377A plasmid pETEC_6, complete sequence.
NC_009788	70609	50.21	Escherichia coli O139:H28 str. E24377A plasmid pETEC_73, complete sequence.
NC_009790	74224	49.85	Escherichia coli O139:H28 str. E24377A plasmid pETEC_74, complete sequence.
NC_009786	79237	47.27	Escherichia coli O139:H28 str. E24377A plasmid pETEC_80, complete sequence.
NZ_CP024244	152012	49.43	Escherichia coli O128:H27 strain 90-9281 plasmid unnamed, complete sequence.
NZ_CP021871	134899	51.87	Escherichia coli strain H105 plasmid pH105, complete sequence.
NZ_CP019908	33304	41.84	Escherichia coli strain MDR_56 plasmid pMCR1-NY, complete sequence.
NZ_CP019904	108340	52.05	Escherichia coli strain MDR_56 plasmid unnamed1, complete sequence.
NZ_CP019907	20225	49.72	Escherichia coli strain MDR_56 plasmid unnamed2, complete sequence.
NZ_CP019909	85009	50.24	Escherichia coli strain MDR_56 plasmid unnamed3, complete sequence.
NZ_CP019910	68786	52.64	Escherichia coli strain MDR_56 plasmid unnamed4, complete sequence.
NZ_CP019906	29168	51.12	Escherichia coli strain MDR_56 plasmid unnamed5, complete sequence.
NZ_CP019905	142304	50.81	Escherichia coli strain MDR_56 plasmid unnamed6, complete sequence.
NZ_AP022223	139020	51.15	Escherichia coli strain WP8-S17-ESBL-12 plasmid pWP8-S17-ESBL-12_1, complete sequence.
NZ_AP022224	87171	52.56	Escherichia coli strain WP8-S17-ESBL-12 plasmid pWP8-S17-ESBL-12_2, complete sequence.
NZ_AP022225	70764	50.85	Escherichia coli strain WP8-S17-ESBL-12 plasmid pWP8-S17-ESBL-12_3, complete sequence.
NZ_AP022226	5631	47.24	Escherichia coli strain WP8-S17-ESBL-12 plasmid pWP8-S17-ESBL-12_4, complete sequence.
NZ_CP033761	111938	52.22	Escherichia coli strain FDAARGOS_536 plasmid unnamed1, complete sequence.
NZ_CP033763	3272	45.84	Escherichia coli strain FDAARGOS_536 plasmid unnamed2, complete sequence.
NZ_CP033764	5430	51.03	Escherichia coli strain FDAARGOS_536 plasmid unnamed3, complete sequence.
NZ_CP033765	4074	51.6	Escherichia coli strain FDAARGOS_536 plasmid unnamed4, complete sequence.
NZ_CP033766	2101	47.17	Escherichia coli strain FDAARGOS_536 plasmid unnamed5, complete sequence.
NZ_CP015075	63544	51.21	Escherichia coli strain Ecol_745 plasmid pEC745_OXA48, complete sequence.
NZ_CP031295	245305	51.37	Escherichia coli strain EC17GD31 plasmid pGD31-F1928, complete sequence.
NZ_CP031294	110686	45.7	Escherichia coli strain EC17GD31 plasmid pGD31-F25, complete sequence.
NZ_CP031296	60038	42.28	Escherichia coli strain EC17GD31 plasmid pGD31-MCR, complete sequence.
NZ_CP031297	188230	51.62	Escherichia coli strain EC17GD31 plasmid pGD31-NDM, complete sequence.
NZ_CP065153	237102	50.49	Escherichia coli O150:H6 strain FEX669 plasmid unnamed1, complete sequence.
NZ_CP023350	112045	48.08	Escherichia coli strain ETEC-2264 plasmid unnamed1, complete sequence.
NZ_CP023351	77345	51.86	Escherichia coli strain ETEC-2264 plasmid unnamed2, complete sequence.
NZ_CP023352	45777	49.94	Escherichia coli strain ETEC-2264 plasmid unnamed3, complete sequence.
NZ_CP031907	121036	49.03	Escherichia coli O91:H21 strain FWSEC0008 plasmid unnamed17, complete sequence.
NZ_AP022065	134864	51.88	Escherichia coli strain WP4-W18-ESBL-08 plasmid pWP4-W18-ESBL-08_1, complete sequence.
NZ_AP022066	95805	49.36	Escherichia coli strain WP4-W18-ESBL-08 plasmid pWP4-W18-ESBL-08_2, complete sequence.
NZ_AP022067	5167	47.51	Escherichia coli strain WP4-W18-ESBL-08 plasmid pWP4-W18-ESBL-08_3, complete sequence.
NZ_AP022068	4087	49.82	Escherichia coli strain WP4-W18-ESBL-08 plasmid pWP4-W18-ESBL-08_4, complete sequence.
NZ_CP010141	174041	50.09	Escherichia coli strain D3 plasmid A, complete sequence.
NZ_CP010142	90974	49.66	Escherichia coli strain D3 plasmid B, complete sequence.
NZ_CP067236	122982	49.81	Escherichia coli strain SBF22 plasmid pSBF22a, complete sequence.
NZ_CP067237	96901	47.78	Escherichia coli strain SBF22 plasmid pSBF22b, complete sequence.
NZ_CP067238	25897	49.6	Escherichia coli strain SBF22 plasmid pSBF22c, complete sequence.
NZ_CP067239	3131	45.58	Escherichia coli strain SBF22 plasmid pSBF22d, complete sequence.
NZ_CP067240	2295	49.32	Escherichia coli strain SBF22 plasmid pSBF22e, complete sequence.
NZ_CP021719	128094	51.59	Escherichia coli strain AR_0128 plasmid tig00000792, complete sequence.
NZ_CP021720	216378	50.69	Escherichia coli strain AR_0128 plasmid tig00000793, complete sequence.
NZ_CP021721	9396	46.57	Escherichia coli strain AR_0128 plasmid tig00000856, complete sequence.
NZ_CP024241	104674	47.56	Escherichia coli O114:H49 strain 90-9280 plasmid unnamed1.
NZ_CP024242	74644	52.92	Escherichia coli O114:H49 strain 90-9280 plasmid unnamed2, complete sequence.
NZ_CP027369	109641	45.8	Escherichia coli strain 2014C-3307 plasmid unnamed1, complete sequence.
NZ_CP027370	176149	49.81	Escherichia coli strain 2014C-3307 plasmid unnamed2.
NC_011602	6147	52.76	Escherichia coli O127:H6 str. E2348/69 plasmid pE2348-2, complete sequence.
NC_011603	97978	48.01	Escherichia coli O127:H6 str. E2348/69 plasmid pMAR2, complete sequence.
NZ_LR890350	300631	48.58	Escherichia coli isolate MSB1_9D-sc-2280338 plasmid 2, complete sequence.
NZ_LR890351	59604	50.91	Escherichia coli isolate MSB1_9D-sc-2280338 plasmid 3, complete sequence.
NZ_LR890352	5509	43.76	Escherichia coli isolate MSB1_9D-sc-2280338 plasmid 4, complete sequence.
NZ_AP022541	211336	47.15	Escherichia coli strain THO-010 plasmid pTHO-010-1, complete sequence.
NZ_AP022542	113269	45.8	Escherichia coli strain THO-010 plasmid pTHO-010-2, complete sequence.
NZ_AP022543	111439	49.64	Escherichia coli strain THO-010 plasmid pTHO-010-3, complete sequence.
NZ_AP022544	84757	47.7	Escherichia coli strain THO-010 plasmid pTHO-010-4, complete sequence.
NZ_AP022545	27490	50.09	Escherichia coli strain THO-010 plasmid pTHO-010-5, complete sequence.
NZ_AP022546	3121	51.78	Escherichia coli strain THO-010 plasmid pTHO-010-6, complete sequence.
NZ_CP058224	162608	52.53	Escherichia coli strain 550 plasmid p550_IncA_VIM_1, complete sequence.
NZ_CP058225	100306	51.61	Escherichia coli strain 550 plasmid p550_IncB_O_K_Z, complete sequence.
NZ_CP062911	6647	48.52	Escherichia coli O112ab:H8 strain Res13-Lact-EA06-22 plasmid unnamed23, complete sequence.
NZ_CP062912	4073	44.12	Escherichia coli O112ab:H8 strain Res13-Lact-EA06-22 plasmid unnamed32, complete sequence.
NZ_CP062913	110368	51.15	Escherichia coli O112ab:H8 strain Res13-Lact-EA06-22 plasmid unnamed476, complete sequence.
NZ_CP062914	120310	46.86	Escherichia coli O112ab:H8 strain Res13-Lact-EA06-22 plasmid unnamed920, complete sequence.
NZ_CP062915	151873	49.49	Escherichia coli O112ab:H8 strain Res13-Lact-EA06-22 plasmid unnamed973, complete sequence.
NZ_CP070592	1549	51.13	Escherichia coli strain ESC53083 plasmid p53083_1, complete sequence.
NZ_CP070591	4087	49.87	Escherichia coli strain ESC53083 plasmid p53083_2, complete sequence.
NZ_CP070590	101334	52.73	Escherichia coli strain ESC53083 plasmid p53083_3, complete sequence.
NZ_CP070589	6895	48.99	Escherichia coli strain ESC53083 plasmid p53083_4.
NZ_CP070588	18779	51.36	Escherichia coli strain ESC53083 plasmid p53083_IncFII.
NZ_CP070587	88947	52.95	Escherichia coli strain ESC53083 plasmid p53083_KPC, complete sequence.
NZ_CP048305	159959	52.61	Escherichia coli strain 9 plasmid p009_A, complete sequence.
NZ_CP048306	110182	45.98	Escherichia coli strain 9 plasmid p009_B, complete sequence.
NZ_CP048307	94239	51.68	Escherichia coli strain 9 plasmid p009_C, complete sequence.
NZ_CP048308	26999	50.53	Escherichia coli strain 9 plasmid p009_D, complete sequence.
NZ_CP048309	24518	51.01	Escherichia coli strain 9 plasmid p009_E, complete sequence.
NZ_CP022165	233149	45.54	Escherichia coli strain M160133 plasmid pM160133_p1, complete sequence.
NZ_CP022166	173624	50.83	Escherichia coli strain M160133 plasmid pM160133_p2, complete sequence.
NZ_CP022167	113428	46.25	Escherichia coli strain M160133 plasmid pM160133_p3, complete sequence.
NZ_CP031899	160712	49.43	Escherichia coli O113:H21 strain FWSEC0010 plasmid unnamed1, complete sequence.
NZ_CP031900	7769	48.56	Escherichia coli O113:H21 strain FWSEC0010 plasmid unnamed2, complete sequence.
NZ_CP031901	7117	50.4	Escherichia coli O113:H21 strain FWSEC0010 plasmid unnamed3, complete sequence.
NZ_CP060077	50572	44.61	Escherichia coli strain G3/10 plasmid pSYM1, complete sequence.
NZ_CP060078	4197	42.98	Escherichia coli strain G3/10 plasmid pSYM2, complete sequence.
NZ_CP060079	1934	51.4	Escherichia coli strain G3/10 plasmid pSYM3, complete sequence.
NZ_CP060081	1304	51.53	Escherichia coli strain G3/10 plasmid pSYM4, complete sequence.
NZ_CP060076	100783	50.8	Escherichia coli strain G3/10 plasmid pSYM5/6, complete sequence.
NZ_CP060080	1887	51.93	Escherichia coli strain G3/10 plasmid unnamed1, complete sequence.
NZ_CP060082	1240	46.13	Escherichia coli strain G3/10 plasmid unnamed2, complete sequence.
NZ_CP025868	100473	47.26	Escherichia coli strain 504211 plasmid p504211_100, complete sequence.
NZ_CP025867	50529	46.54	Escherichia coli strain 504211 plasmid p504211_50, complete sequence.
NZ_CP025866	78116	45.88	Escherichia coli strain 504211 plasmid p504211_78, complete sequence.
NZ_CP061915	68025	51.85	Escherichia coli strain SMBL plasmid p1, complete sequence.
NZ_CP061916	6754	51.24	Escherichia coli strain SMBL plasmid p2, complete sequence.
NZ_AP022033	105867	51.82	Escherichia coli strain WP3-S18-ESBL-08 plasmid pWP3-S18-ESBL-08_1, complete sequence.
NZ_AP022034	5167	47.51	Escherichia coli strain WP3-S18-ESBL-08 plasmid pWP3-S18-ESBL-08_2, complete sequence.
NZ_AP022035	4087	49.84	Escherichia coli strain WP3-S18-ESBL-08 plasmid pWP3-S18-ESBL-08_3, complete sequence.
NZ_CP027311	133438	50.35	Escherichia coli strain 2014C-4135 plasmid unnamed, complete sequence.
NZ_CP009167	108501	47.78	Escherichia coli 1303 plasmid p1303_109, complete sequence.
NZ_CP009169	4671	45.75	Escherichia coli 1303 plasmid p1303_5, complete sequence.
NZ_CP009168	94959	48.08	Escherichia coli 1303 plasmid p1303_95, complete sequence.
NZ_CP018982	100168	51.72	Escherichia coli strain Ecol_867 plasmid pEC867_1, complete sequence.
NZ_CP018980	4074	49.85	Escherichia coli strain Ecol_867 plasmid pEC867_3, complete sequence.
NZ_CP018981	14029	59.26	Escherichia coli strain Ecol_867 plasmid pEC867_KPC, complete sequence.
NZ_CP011417	293826	46.62	Escherichia coli strain CFSAN029787 plasmid pCFSAN029787_01, complete sequence.
NZ_CP011418	47606	51.85	Escherichia coli strain CFSAN029787 plasmid pCFSAN029787_02, complete sequence.
NZ_CP069448	114237	51.02	Escherichia coli strain FDAARGOS_1255 plasmid unnamed1, complete sequence.
NZ_CP069449	2159	44.05	Escherichia coli strain FDAARGOS_1255 plasmid unnamed2.
NZ_CP041303	157660	49.83	Escherichia coli strain MSHS 133 plasmid pCys-11, complete sequence.
NZ_CP033159	146286	52.88	Escherichia coli strain CM IVRI KOL-1 plasmid p1ESCUMpO83_CORR.
NZ_CP033160	62055	49.77	Escherichia coli strain CM IVRI KOL-1 plasmid pESBL-EA11p1ESCUM.
NZ_CP033161	6346	51.02	Escherichia coli strain CM IVRI KOL-1 plasmid unnamed.
NZ_LR890652	207369	49.6	Escherichia coli isolate MINF_2E-sc-2280463 plasmid 2, complete sequence.
NZ_LR890653	114568	51.41	Escherichia coli isolate MINF_2E-sc-2280463 plasmid 3, complete sequence.
NZ_LR890654	6062	47.31	Escherichia coli isolate MINF_2E-sc-2280463 plasmid 4, complete sequence.
NZ_LR890655	4618	49.94	Escherichia coli isolate MINF_2E-sc-2280463 plasmid 5, complete sequence.
NZ_LR890656	1506	50.2	Escherichia coli isolate MINF_2E-sc-2280463 plasmid 6, complete sequence.
NZ_CP045207	194162	49.85	Escherichia coli strain DE17 plasmid unnamed1, complete sequence.
NZ_CP045208	2312	41.09	Escherichia coli strain DE17 plasmid unnamed2, complete sequence.
NZ_CP059842	5218	49.37	Escherichia coli strain E2348/69 plasmid p5217, complete sequence.
NZ_CP059841	96603	47.99	Escherichia coli strain E2348/69 plasmid pMAR2, complete sequence.
NZ_CP024224	20005	52.18	Escherichia coli O169:H41 strain 2014EL-1345-2 plasmid unnamed1.
NZ_CP024225	27947	52.75	Escherichia coli O169:H41 strain 2014EL-1345-2 plasmid unnamed2.
NZ_CP024226	85864	50.22	Escherichia coli O169:H41 strain 2014EL-1345-2 plasmid unnamed3.
NZ_CP024227	145086	46.15	Escherichia coli O169:H41 strain 2014EL-1345-2 plasmid unnamed4, complete sequence.
NZ_CP019052	65533	42.49	Escherichia coli strain CRE1540 plasmid p1540-1, complete sequence.
NZ_CP019053	155802	52.58	Escherichia coli strain CRE1540 plasmid p1540-2, complete sequence.
NZ_CP019054	116028	49.15	Escherichia coli strain CRE1540 plasmid p1540-3, complete sequence.
NZ_CP019055	184166	49.14	Escherichia coli strain CRE1540 plasmid p1540-4, complete sequence.
NZ_CP010181	201930	47.14	Escherichia coli strain M1 plasmid A, complete sequence.
NZ_CP010182	4980	45.4	Escherichia coli strain M1 plasmid B, complete sequence.
NZ_CP021690	163045	51.06	Escherichia coli strain AR_0058 plasmid tig00007555j7554, complete sequence.
NZ_CP010184	200925	47.1	Escherichia coli strain M3 plasmid A, complete sequence.
NZ_CP010185	4980	45.4	Escherichia coli strain M3 plasmid B, complete sequence.
NZ_CP065623	123793	48.14	Escherichia coli strain FDAARGOS_941 plasmid unnamed, complete sequence.
NZ_CP030112	88421	50.57	Escherichia coli strain MCJCHV-1 plasmid pNMEC-O75A, complete sequence.
NZ_CP030113	6465	42.57	Escherichia coli strain MCJCHV-1 plasmid pNMEC-O75B, complete sequence.
NZ_CP030114	4082	49.41	Escherichia coli strain MCJCHV-1 plasmid pNMEC-O75C, complete sequence.
NZ_CP030115	2113	47.14	Escherichia coli strain MCJCHV-1 plasmid pNMEC-O75D, complete sequence.
NZ_CP030116	1983	56.08	Escherichia coli strain MCJCHV-1 plasmid pNMEC-O75E, complete sequence.
NZ_CP034396	134635	50.84	Escherichia coli strain CRE1 plasmid pCRE1.1, complete sequence.
NZ_CP034397	93642	49.22	Escherichia coli strain CRE1 plasmid pCRE1.2, complete sequence.
NZ_CP034400	61553	42.45	Escherichia coli strain CRE1 plasmid pCRE1.3, complete sequence.
NZ_CP034398	41185	50.81	Escherichia coli strain CRE1 plasmid pCRE1.4, complete sequence.
NZ_CP024816	176274	51.09	Escherichia coli strain CREC-629 plasmid pCREC-629_1, complete sequence.
NZ_CP024817	96990	47.63	Escherichia coli strain CREC-629 plasmid pCREC-629_2, complete sequence.
NZ_CP024818	46161	46.65	Escherichia coli strain CREC-629 plasmid pCREC-629_3, complete sequence.
NZ_CP068153	80453	50.34	Escherichia coli strain FDAARGOS_1077 plasmid unnamed1, complete sequence.
NZ_CP068154	72354	49.22	Escherichia coli strain FDAARGOS_1077 plasmid unnamed2, complete sequence.
NZ_CP041438	89435	48.89	Escherichia coli strain STEC005 plasmid pSTEC005, complete sequence.
NZ_CP023816	145883	51.67	Escherichia coli strain IMT16316 plasmid pEcIMT16316, complete sequence.
NZ_CP026940	155172	51.49	Escherichia coli strain CFS3313 plasmid pCFS3313-1, complete sequence.
NZ_CP026941	111813	50.93	Escherichia coli strain CFS3313 plasmid pCFS3313-2, complete sequence.
NZ_CP026942	31764	41.34	Escherichia coli strain CFS3313 plasmid pCFS3313-3, complete sequence.
NZ_CP024264	72060	45.8	Escherichia coli O169:H41 strain F6326-C1 plasmid unnamed1.
NZ_CP024265	150389	46.38	Escherichia coli O169:H41 strain F6326-C1 plasmid unnamed2, complete sequence.
NZ_CP040884	145272	52.22	Escherichia coli strain K71-77 plasmid pK71-77-1-NDM, complete sequence.
NZ_CP040885	117590	51.35	Escherichia coli strain K71-77 plasmid pK71-77-2, complete sequence.
NZ_CP027256	103336	48.08	Escherichia coli strain EC11 plasmid unnamed1, complete sequence.
NZ_CP027257	31229	41.74	Escherichia coli strain EC11 plasmid unnamed2, complete sequence.
NZ_CP027258	31467	48.41	Escherichia coli strain EC11 plasmid unnamed3, complete sequence.
NZ_CP027259	6812	47.7	Escherichia coli strain EC11 plasmid unnamed4, complete sequence.
NZ_CP048293	269306	47.01	Escherichia coli strain CVM N18EC0432 plasmid pN18EC0432-1, complete sequence.
NZ_CP048296	137411	50.78	Escherichia coli strain CVM N18EC0432 plasmid pN18EC0432-2, complete sequence.
NZ_CP048295	99802	49.93	Escherichia coli strain CVM N18EC0432 plasmid pN18EC0432-3, complete sequence.
NZ_CP048291	47739	41.24	Escherichia coli strain CVM N18EC0432 plasmid pN18EC0432-4, complete sequence.
NZ_CP048292	7010	53.59	Escherichia coli strain CVM N18EC0432 plasmid pN18EC0432-5, complete sequence.
NZ_CP048294	2461	40.35	Escherichia coli strain CVM N18EC0432 plasmid pN18EC0432-6, complete sequence.
NZ_CP062212	177038	50.82	Escherichia coli strain L3Cip3 plasmid unnamed1, complete sequence.
NZ_CP062213	88924	49.76	Escherichia coli strain L3Cip3 plasmid unnamed2, complete sequence.
NZ_CP062214	83974	52.49	Escherichia coli strain L3Cip3 plasmid unnamed3, complete sequence.
NZ_CP062215	44671	43.92	Escherichia coli strain L3Cip3 plasmid unnamed4, complete sequence.
NZ_CP062216	2255	42.75	Escherichia coli strain L3Cip3 plasmid unnamed5.
NZ_CP062217	1565	50.86	Escherichia coli strain L3Cip3 plasmid unnamed6.
NZ_CP034401	134611	50.84	Escherichia coli strain CRE10 plasmid pCRE10.1, complete sequence.
NZ_CP034402	92446	49.28	Escherichia coli strain CRE10 plasmid pCRE10.2, complete sequence.
NZ_CP034405	61684	42.45	Escherichia coli strain CRE10 plasmid pCRE10.3, complete sequence.
NZ_CP034403	41191	50.8	Escherichia coli strain CRE10 plasmid pCRE10.4, complete sequence.
NZ_CP025751	110160	49.39	Escherichia coli strain CV839-06 plasmid pCV839-06-p1, complete sequence.
NZ_CP025752	63821	43.86	Escherichia coli strain CV839-06 plasmid pCV839-06-p2, complete sequence.
NZ_CP010173	94395	48.12	Escherichia coli strain H8 plasmid A, complete sequence.
NZ_CP010174	106274	52.63	Escherichia coli strain H8 plasmid B, complete sequence.
NZ_CP010175	6647	48.5	Escherichia coli strain H8 plasmid C, complete sequence.
NZ_LR890411	52208	49.75	Escherichia coli isolate MSB2_1A-sc-2280429 plasmid 2, complete sequence.
NZ_LR890412	5878	47.41	Escherichia coli isolate MSB2_1A-sc-2280429 plasmid 3, complete sequence.
NZ_LR890413	4072	51.47	Escherichia coli isolate MSB2_1A-sc-2280429 plasmid 4, complete sequence.
NZ_LR890414	2113	47.14	Escherichia coli isolate MSB2_1A-sc-2280429 plasmid 5, complete sequence.
NZ_CP005931	194170	49.84	Escherichia coli APEC IMT5155 plasmid p1ColV5155, complete sequence.
NZ_CP005932	2836	42.21	Escherichia coli APEC IMT5155 plasmid p25155, complete sequence.
NZ_CP035721	109023	51.72	Escherichia coli strain U15A plasmid pU15A_A, complete sequence.
NZ_CP035722	69541	50.72	Escherichia coli strain U15A plasmid pU15A_B, complete sequence.
NZ_CP035723	5209	48.55	Escherichia coli strain U15A plasmid pU15A_C, complete sequence.
NZ_CP035724	8166	49.4	Escherichia coli strain U15A plasmid pU15A_D, complete sequence.
NZ_CP035725	5632	47.41	Escherichia coli strain U15A plasmid pU15A_E, complete sequence.
NZ_CP035726	1506	50.2	Escherichia coli strain U15A plasmid pU15A_F, complete sequence.
NZ_AP021934	105973	50.33	Escherichia coli strain WP2-W18-ESBL-08 plasmid pWP2-W18-ESBL-08_1, complete sequence.
NZ_CP041426	114158	46.06	Escherichia coli strain STEC388 plasmid pSTEC388_1, complete sequence.
NZ_CP041427	67518	47.71	Escherichia coli strain STEC388 plasmid pSTEC388_2, complete sequence.
NZ_CP041428	67626	52.22	Escherichia coli strain STEC388 plasmid pSTEC388_3, complete sequence.
NZ_CP069502	77233	51.6	Escherichia coli strain FDAARGOS_1268 plasmid unnamed1, complete sequence.
NZ_CP069503	4072	51.45	Escherichia coli strain FDAARGOS_1268 plasmid unnamed2, complete sequence.
NZ_LR882991	146433	46.13	Escherichia coli isolate L7_E1373_ETEC plasmid 2, complete sequence.
NZ_LR882992	109318	46.43	Escherichia coli isolate L7_E1373_ETEC plasmid 3, complete sequence.
NZ_CP063477	113297	49.97	Escherichia coli strain EM10-18-28 plasmid pEM10-18-28_1, complete sequence.
NZ_CP063478	47841	47.19	Escherichia coli strain EM10-18-28 plasmid pEM10-18-28_2, complete sequence.
NZ_CP019007	128248	49.76	Escherichia coli strain Ecol_AZ159 plasmid pECAZ159_1, complete sequence.
NZ_CP019006	47531	51.15	Escherichia coli strain Ecol_AZ159 plasmid pECAZ159_2, complete sequence.
NZ_CP011916	110961	50.04	Escherichia coli strain PSUO2 plasmid pPSUO2, complete sequence.
NZ_CP063480	5330	44.75	Escherichia coli strain EM06-18-14 plasmid pEM06-18-14_1, complete sequence.
NZ_CP063481	91066	52.33	Escherichia coli strain EM06-18-14 plasmid pEM06-18-14_2, complete sequence.
NZ_CP063482	2347	41.54	Escherichia coli strain EM06-18-14 plasmid pEM06-18-14_3, complete sequence.
NZ_CP031139	25446	28.1	Escherichia coli strain CFSAN064035 plasmid pGMI17-003, complete sequence.
NZ_CP031135	310064	51.2	Escherichia coli strain CFSAN064035 plasmid pGMI17-003_1, complete sequence.
NZ_CP031136	109442	46.04	Escherichia coli strain CFSAN064035 plasmid pGMI17-003_2, complete sequence.
NZ_CP031137	77958	50.13	Escherichia coli strain CFSAN064035 plasmid pGMI17-003_3, complete sequence.
NZ_CP031138	46157	46.65	Escherichia coli strain CFSAN064035 plasmid pGMI17-003_4, complete sequence.
NZ_LS992186	164477	49.98	Escherichia coli isolate Escherichia coli str. 3426 plasmid 2, complete sequence.
NZ_LS992187	99072	50.31	Escherichia coli isolate Escherichia coli str. 3426 plasmid 3, complete sequence.
NZ_LS992188	96986	52.62	Escherichia coli isolate Escherichia coli str. 3426 plasmid 4, complete sequence.
NZ_LS992189	64687	42.05	Escherichia coli isolate Escherichia coli str. 3426 plasmid 5.
NZ_CP047406	142890	51.5	Escherichia coli strain MS6193 plasmid pMS6193A-NDM, complete sequence.
NZ_CP047407	76661	51.91	Escherichia coli strain MS6193 plasmid pMS6193B, complete sequence.
NZ_CP047408	4367	54.39	Escherichia coli strain MS6193 plasmid pMS6193C, complete sequence.
NZ_CP025915	35753	48.61	Escherichia coli strain 203740 plasmid p203740_35, complete sequence.
NZ_CP025914	80861	46.27	Escherichia coli strain 203740 plasmid p203740_80, complete sequence.
NZ_AP017611	168972	47.7	Escherichia coli strain 20Ec-P-124 plasmid pMRY16-002_1, complete sequence.
NZ_AP017612	108986	46.09	Escherichia coli strain 20Ec-P-124 plasmid pMRY16-002_2, complete sequence.
NZ_AP017613	108957	53.05	Escherichia coli strain 20Ec-P-124 plasmid pMRY16-002_3, complete sequence.
NZ_AP017614	61805	42.49	Escherichia coli strain 20Ec-P-124 plasmid pMRY16-002_4, complete sequence.
NZ_AP017615	6078	49.1	Escherichia coli strain 20Ec-P-124 plasmid pMRY16-002_5, complete sequence.
NZ_AP017616	4073	51.46	Escherichia coli strain 20Ec-P-124 plasmid pMRY16-002_6, complete sequence.
NZ_AP022096	158292	50.09	Escherichia coli strain WP4-S18-ESBL-08 plasmid pWP4-S18-ESBL-08_1, complete sequence.
NZ_AP022097	93398	49.96	Escherichia coli strain WP4-S18-ESBL-08 plasmid pWP4-S18-ESBL-08_2, complete sequence.
NZ_CP025870	100470	47.26	Escherichia coli strain 503829 plasmid p503829_100, complete sequence.
NZ_CP025871	52054	46.43	Escherichia coli strain 503829 plasmid p503829_52, complete sequence.
NZ_CP025872	77635	45.82	Escherichia coli strain 503829 plasmid p503829_77, complete sequence.
NC_016904	103795	49.98	Escherichia coli KO11FL plasmid pEKO1101, complete sequence.
NC_016903	5360	46.03	Escherichia coli KO11FL plasmid pEKO1102, complete sequence.
NZ_CP069543	50632	52.45	Escherichia coli strain FDAARGOS_1248 plasmid unnamed1, complete sequence.
NZ_CP069544	80965	45.24	Escherichia coli strain FDAARGOS_1248 plasmid unnamed2, complete sequence.
NZ_CP069545	3347	46.55	Escherichia coli strain FDAARGOS_1248 plasmid unnamed3, complete sequence.
NZ_CP069546	6211	52.52	Escherichia coli strain FDAARGOS_1248 plasmid unnamed4, complete sequence.
NZ_CP069547	3816	54.8	Escherichia coli strain FDAARGOS_1248 plasmid unnamed5.
NZ_CP069548	2099	39.45	Escherichia coli strain FDAARGOS_1248 plasmid unnamed6.
NZ_CP024975	86835	51.07	Escherichia coli strain CV839-15 plasmid pCV839-15-p1, complete sequence.
NZ_CP024976	195578	48.86	Escherichia coli strain CV839-15 plasmid pCV839-15-p2, complete sequence.
NZ_CP024977	62669	51.61	Escherichia coli strain CV839-15 plasmid pCV839-15-p3, complete sequence.
NZ_CP041436	88727	49.25	Escherichia coli strain STEC309 plasmid pSTEC309, complete sequence.
NZ_CP024139	64765	42.91	Escherichia coli strain 14EC020 plasmid p14EC020a, complete sequence.
NZ_CP024140	166233	50.61	Escherichia coli strain 14EC020 plasmid p14EC020b, complete sequence.
NZ_CP024254	107732	52.14	Escherichia coli strain ATCC 43886 plasmid unnamed1, complete sequence.
NZ_CP024255	95515	47.23	Escherichia coli strain ATCC 43886 plasmid unnamed2, complete sequence.
NZ_CP032991	83867	51.13	Escherichia coli strain W2-5 plasmid p2_W2-5, complete sequence.
NZ_CP032990	66380	42.92	Escherichia coli strain W2-5 plasmid pMCR_W2-5, complete sequence.
NZ_CP019019	199671	45.49	Escherichia coli strain Ecol_244 plasmid pEC244_1, complete sequence.
NZ_CP019018	158911	49.73	Escherichia coli strain Ecol_244 plasmid pEC244_2, complete sequence.
NZ_CP019016	37756	41.16	Escherichia coli strain Ecol_244 plasmid pEC244_4, complete sequence.
NZ_CP019017	73464	54.73	Escherichia coli strain Ecol_244 plasmid pEC244_KPC, complete sequence.
NZ_CP019011	74891	52.77	Escherichia coli strain Ecol_AZ161 plasmid pECAZ161_1, complete sequence.
NZ_CP019009	130905	52.13	Escherichia coli strain Ecol_AZ161 plasmid pECAZ161_3, complete sequence.
NZ_CP019010	55746	49.59	Escherichia coli strain Ecol_AZ161 plasmid pECAZ161_KPC, complete sequence.
NZ_CP025894	100473	47.26	Escherichia coli strain 503025 plasmid p503025_100, complete sequence.
NZ_CP025893	105440	46.9	Escherichia coli strain 503025 plasmid p503025_105, complete sequence.
NZ_CP025895	52054	46.43	Escherichia coli strain 503025 plasmid p503025_52, complete sequence.
NZ_CP051715	114224	51.02	Escherichia coli strain SCU-122 plasmid pSCU-122-1, complete sequence.
NZ_CP012634	114221	51.02	Escherichia coli strain SF-166 plasmid pSF-166-1, complete sequence.
NZ_CP029421	101340	46.3	Escherichia coli strain 3385 plasmid unnamed1, complete sequence.
NZ_CP029422	89323	50.48	Escherichia coli strain 3385 plasmid unnamed2, complete sequence.
NZ_CP012377	125121	50.58	Escherichia coli strain GE3 isolate human faeces plasmid pGE3, complete sequence.
NZ_CP032420	2959	46.57	Escherichia coli strain SCEC020001 plasmid p1_020001, complete sequence.
NZ_CP032421	2444	48.9	Escherichia coli strain SCEC020001 plasmid p2_020001, complete sequence.
NZ_CP032422	1989	53.14	Escherichia coli strain SCEC020001 plasmid p3_020001, complete sequence.
NZ_CP032423	1521	51.94	Escherichia coli strain SCEC020001 plasmid p4_020001, complete sequence.
NZ_CP032424	46161	46.65	Escherichia coli strain SCEC020001 plasmid pNDM5_020001, complete sequence.
NZ_CP032425	88392	52.07	Escherichia coli strain SCEC020001 plasmid pOXA1_020001, complete sequence.
NZ_AP022262	126588	44.31	Escherichia coli strain WP8-S18-ESBL-07 plasmid pWP8-S18-ESBL-07_1, complete sequence.
NZ_AP022263	91233	50.73	Escherichia coli strain WP8-S18-ESBL-07 plasmid pWP8-S18-ESBL-07_2, complete sequence.
NZ_CP022280	191691	45.51	Escherichia coli strain STEC299 plasmid pSTEC299_1, complete sequence.
NZ_CP022281	59190	42.99	Escherichia coli strain STEC299 plasmid pSTEC299_2, complete sequence.
NZ_CP020524	177196	51.29	Escherichia coli strain 190 plasmid unnamed1, complete sequence.
NZ_CP020523	113880	52.01	Escherichia coli strain 190 plasmid unnamed2, complete sequence.
NZ_CP020522	95146	47.75	Escherichia coli strain 190 plasmid unnamed3, complete sequence.
NZ_CP020521	13689	44.36	Escherichia coli strain 190 plasmid unnamed4, complete sequence.
NZ_CP039405	85191	47.75	Escherichia coli strain 377323_2f plasmid unnamed, complete sequence.
NZ_CP024270	35769	48.15	Escherichia coli strain F8111-1SC3 plasmid unnamed1.
NZ_CP024271	103618	46.36	Escherichia coli strain F8111-1SC3 plasmid unnamed2.
NZ_CP024272	147766	46.11	Escherichia coli strain F8111-1SC3 plasmid unnamed3, complete sequence.
NZ_CP027374	91648	49.51	Escherichia coli strain 05-3629 plasmid unnamed1, complete sequence.
NZ_CP027375	118863	48.8	Escherichia coli strain 05-3629 plasmid unnamed2, complete sequence.
NZ_LT883139	118720	49.93	Escherichia coli isolate 6666666.257727.embl plasmid I.
NZ_LT883140	30364	54.95	Escherichia coli isolate 6666666.257727.embl plasmid II.
NZ_LT883141	123705	51.94	Escherichia coli isolate 6666666.257727.embl plasmid III.
NZ_CP015245	8122	49.69	Escherichia coli O91 str. RM7190 plasmid pRM7190-1, complete sequence.
NZ_CP015246	118513	48.96	Escherichia coli O91 str. RM7190 plasmid pRM7190-2, complete sequence.
NZ_CP024827	122937	50.55	Escherichia coli strain CREC-544 plasmid pCREC-544_1, complete sequence.
NZ_CP024828	51455	48.13	Escherichia coli strain CREC-544 plasmid pCREC-544_2, complete sequence.
NZ_CP024829	32182	43.06	Escherichia coli strain CREC-544 plasmid pCREC-544_3, complete sequence.
[truncated: 1,787 more rows]
